# Supplementary material for: Parallel Genomic Alterations of Antigen and Payload Targets Mediate Polyclonal Acquired Clinical Resistance to Sacituzumab Govitecan in Triple-Negative Breast Cancer
Source: PubMed Central journal article supplement — Cancer Discov. 2021 Aug 17;11(10):2436–45. doi: 10.1158/2159-8290.CD-21-0702 (PMC8495771; doi:10.1158/2159-8290.cd-21-0702), 2021-08-17
Supplement: candisc-11-2436-s001.pdf [file candisc-11-2436-s001.pdf]

Figure S1.

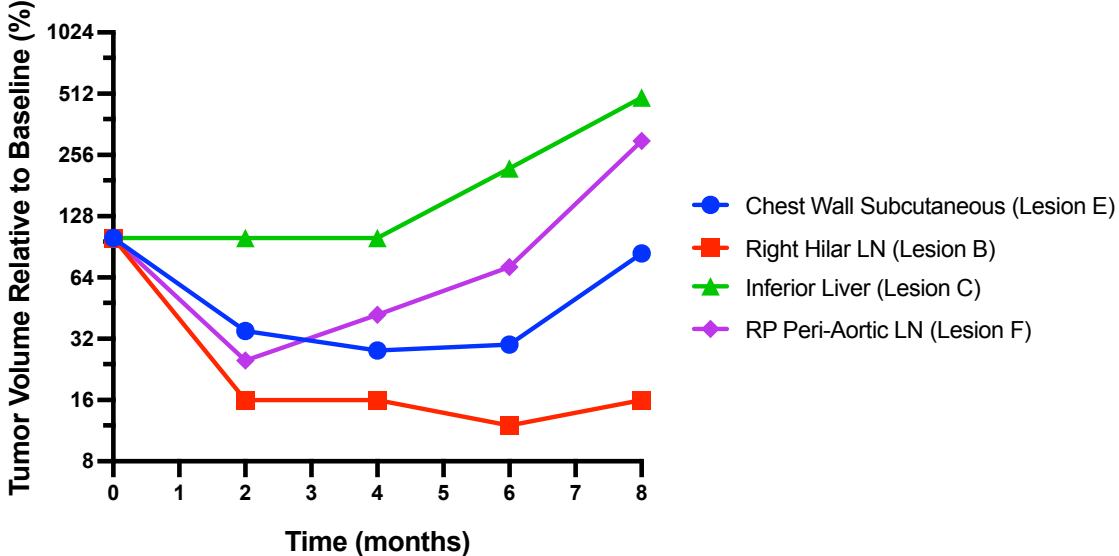

Supplementary Figure S1. Volumetric changes for *TOP1* and *TACSTD2/TROP2* mutation-harboring metastatic lesions of patient MGH-18. Volumes calculated from bi-dimensional measurement of standardized CT images at the indicated times. Time 0 indicates metastatic diagnosis. The indicated lesions correspond to those shown in Figure 2C.

# Figure S2.

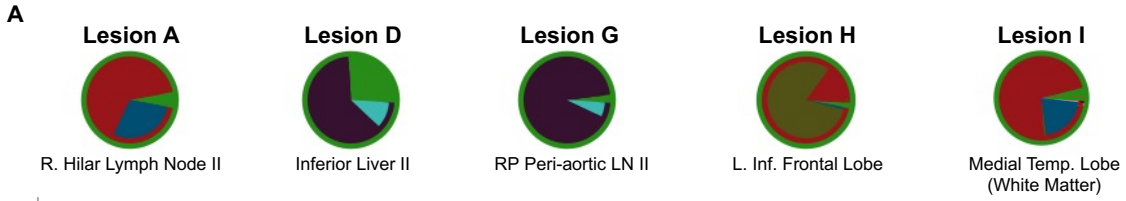

0% TACSTD2/TROP2 T256R  
 0% TOP1 p.-122fs  
 0% TOP1 E418K

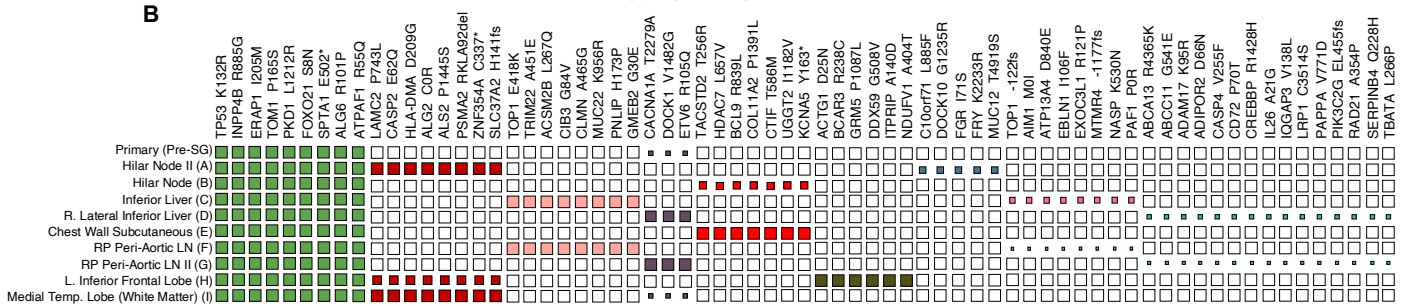

**C**

| Case Series      | Phylogenic          | Hugo        | Reference | Tumor Seq | t_ref_count | t_alt_count | Protein  | Variant Classification | Variant | Cancer Cell    |
|------------------|---------------------|-------------|-----------|-----------|-------------|-------------|----------|------------------------|---------|----------------|
| Lesion/Sample ID | Tree Cluster/Branch | Gene Symbol | Allele    | Allele    | Reads       | Reads       | Change   | Type                   | Type    | Fraction (CCF) |
| Pre-SG           | 3                   | TOP1        | G         | A         | 47          | 0           | p.E418K  | Missense_Mutation      | SNP     | 0              |
| C                | 3                   | TOP1        | G         | A         | 88          | 49          | p.E418K  | Missense_Mutation      | SNP     | 0.98           |
| F                | 3                   | TOP1        | G         | A         | 79          | 30          | p.E418K  | Missense_Mutation      | SNP     | 0.97           |
| Pre-SG           | 5                   | TACSTD2     | G         | C         | 62          | 0           | p.T256R  | Missense_Mutation      | SNP     | 0              |
| B                | 5                   | TACSTD2     | G         | C         | 362         | 155         | p.T256R  | Missense_Mutation      | SNP     | 0.53           |
| E                | 5                   | TACSTD2     | G         | C         | 429         | 76          | p.T256R  | Missense_Mutation      | SNP     | 0.65           |
| Pre-SG           | 8                   | TOP1        | -         | AGATGATT  | 35          | 0           | p.-122fs | Frame_Shift_ins        | INS     | 0              |
| C                | 8                   | TOP1        | -         | AGATGATT  | 118         | 19          | p.-122fs | Frame_Shift_ins        | INS     | 0.34           |
| F                | 8                   | TOP1        | -         | AGATGATT  | 65          | 9           | p.-122fs | Frame_Shift_ins        | INS     | 0.04           |

**D**

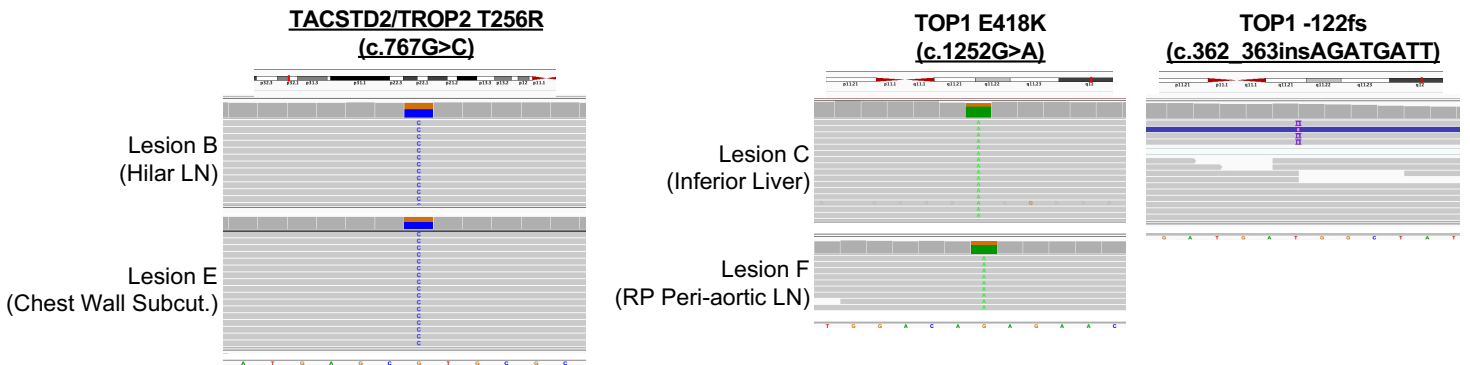

**Supplementary Figure S2. Extended Lesion Data for Index patient (MGH-18).** (A) Pie charts for remaining lesions from MGH-18 that were not included in main text (Fig. 2C). Colors correspond to phylogenetic tree of index patient in Fig. 2B. These five lesions were found not to harbor *TOP1* nor *TACSTD2/TROP2* mutations at any frequency. (B) Representative clonal and subclonal somatic alterations detected in the indicated tissue specimens. The size of each square represents the estimated tumor proportion of each alteration, with an empty box indicating no detection. A complete list of all somatic mutations for MGH-18 lesions is in Table S3. (C) Further details of reported *TOP1* and *TACSTD2/TROP2* mutation frequencies in index patient lesions as per Fig. 2. Pre-SG (Primary, Pre-Treatment) was not found to harbor any *TOP1* nor *TACSTD2/TROP2* mutations. Lesions not shown in the table contained  $\leq 1$  read counts of *TOP1* or *TACSTD2/TROP2* mutations. (D) IGV snapshots of RNAseq reads (rows) for the indicated Figure 2 lesions of interest from MGH-18. For *TACSTD2/TROP2* and *TOP1* point mutations, the colored boxes at top indicate the tumor cell proportion of the wild-type (top) or mutant (bottom) reads, with the color corresponding to the mutant sequence shown. Reference nucleotide sequences are shown at the bottom. Note, for *TACSTD2/TROP2* and *TOP1* point mutations, only mutant reads are shown.

**Figure S3.**

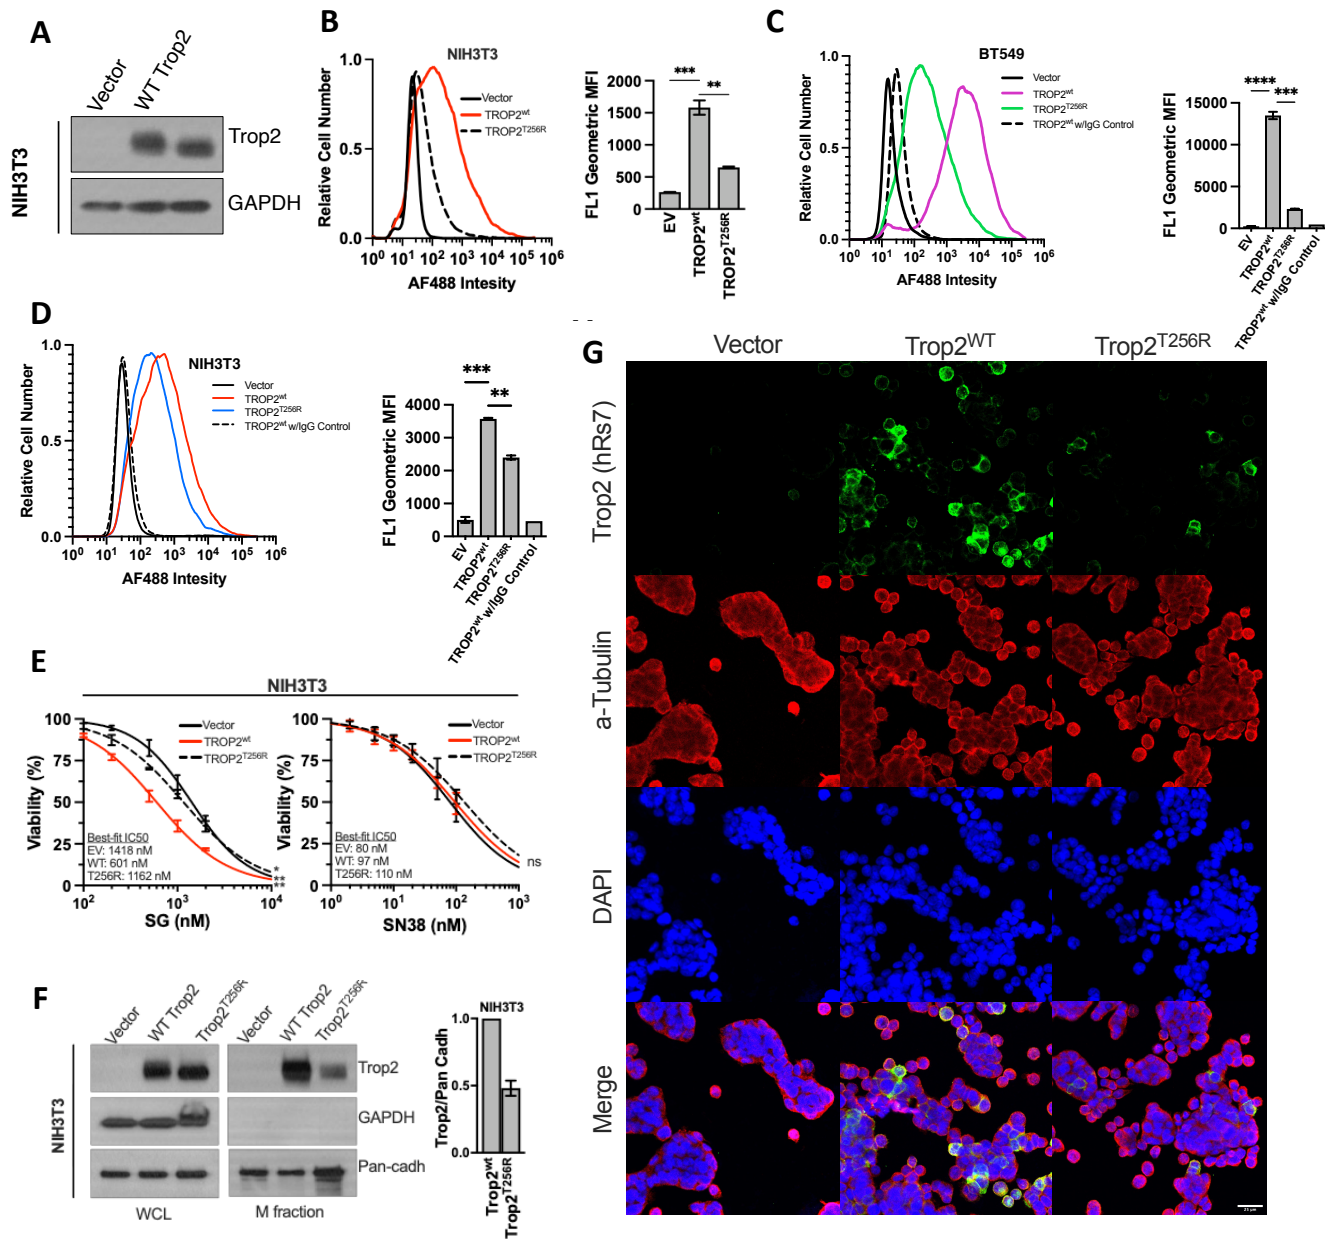



**Supplementary Figure S3. *TACSTD2/TROP2* T256R confers resistance to SG via altered localization and decreased binding to hRS7.** **A**, Western blot of lentivirally-expressed control vector or TROP2 cDNAs in TROP2-negative NIH3T3 cells, showing equivalent expression levels of wild-type (WT) and mutant proteins. **B**, Live-cell flow cytometry of NIH3T3 cells stained with hRS7 reveals a marked decrease in signal intensity for cells harboring TROP2 T256R compared to wild-type. Bar graphs to the right represent geometric mean fluorescent intensity (MFI). Data representative of three independent experiments, and error bars show SD. **C, D**, Live-cell flow cytometry of BT549 (C) and NIH3T3 (D) cells stained with anti-Trop2 polyclonal antibody (AF650) from R&D Systems reveals a marked decrease in signal intensity for cells harboring TROP2 T256R compared to wild-type. Bar graphs to the right represent geometric mean fluorescent intensity (MFI). Data representative of three independent experiments, and error bars show SD. TROP2 T256R mutant confers resistance to SG but not SN38. \*\*\*P<0.001; \*\*P<0.01. \*\*\*\*P<0.0001. **E**, NIH3T3 cells expressing empty vector, WT TROP2, or T256R mutant TROP2 were treated with SG or SN38 at the indicated doses for 4 h and then cultured in fresh medium for 96h before assessing cell viability by using CellTiter Glo. Values plotted represent the mean of quadruplicate wells and an average of three independent experiments. Error bars indicate SD. P-value calculated by two-way ANOVA (cell line, concentration). \*\*P<0.01 (WT vs. Vector); \*P<0.05 (WT vs. T256R); ns, non-significant. **F**, TROP2 T256R has significantly decreased plasma membrane association, shown by comparing WCL and plasma membrane fraction of NIH3T3 cells expressing the vector, WT TROP2, or T256R mutant TROP2. GAPDH and pan-cadherin serve as controls for cytosol and membrane fractions, respectively. Bar graphs at right represent the mean of at least two independent experiments. **G**, hRS7 reveals substantially decreased staining. Vector, WT TROP2, or T256R mutant TROP2. Error bars indicate range. Confocal immunofluorescence using of TROP2 T256R compared to wild-type. BT549 cells on glass coverslip in high-performance plates were washed, then fixed, permeabilized, and blocked prior to staining for TROP2 using hRS7. The samples were maintained in PBS and examined at 40x using a Nikon A1R confocal microscope. Scale bar, 25µm.

**Figure S4.**

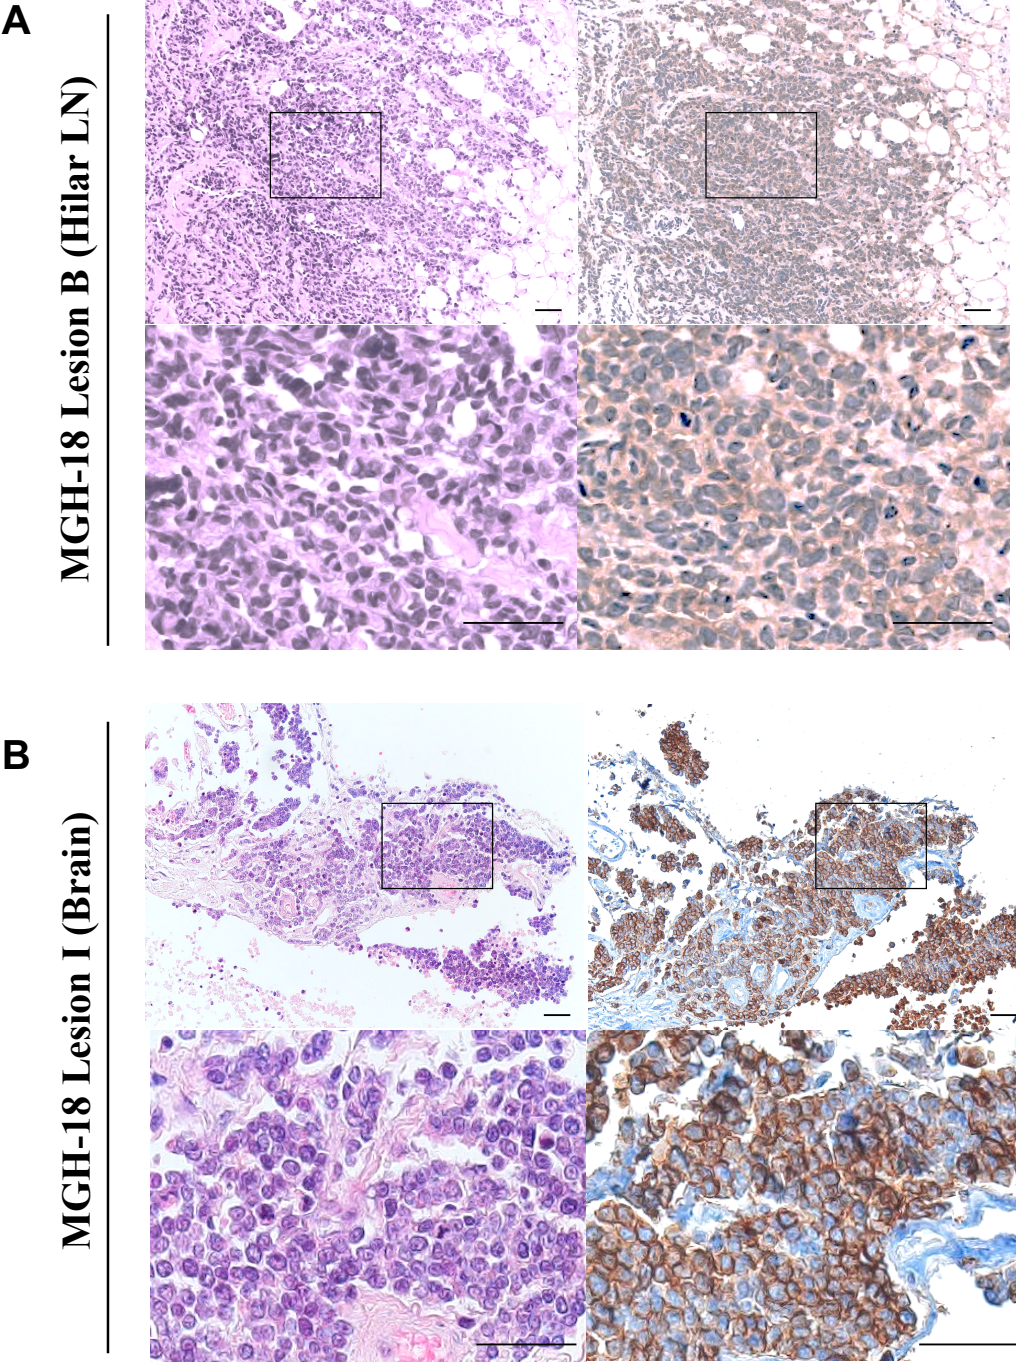

**Supplementary Figure S4. TROP2 IHC Staining Comparison of Lesions from MGH-18.** Hematoxylin and eosin (H&E, left) and TROP2 immunohistochemistry (right) revealing tumor TROP2 protein expression is diffusely cytoplasmic in (A) Hilar Lymph Node (Lesion B) metastasis harboring mutant *TACSTD2/TROP2* T256R, but shows intense membrane staining in (B) Brain metastasis with wild-type TROP2 expression (Lesion I). Scale bars, 50um.

**Table S1. Detailed Patient Cohort Characteristics**

| Patient ID | Age at primary breast cancer diagnosis | Stage at primary breast cancer diagnosis | Grade of primary breast cancer diagnosis | HER2 IHC Score at Metastatic Diagnosis | HER2 FISH Score at Metastatic Diagnosis | Receptor status of primary breast cancer diagnosis | Receptor status at metastatic breast cancer diagnosis | Age at metastatic breast cancer diagnosis | Overall metastatic breast cancer survival (days) |
|------------|----------------------------------------|------------------------------------------|------------------------------------------|----------------------------------------|-----------------------------------------|----------------------------------------------------|-------------------------------------------------------|-------------------------------------------|--------------------------------------------------|
| MGH-18     | 42                                     | 2                                        | 3                                        | 0 (Liver)                              | -                                       | ER-/PR-/HER2-                                      | ER-/PR-/HER2-                                         | 43                                        | 642                                              |
| MGH-19     | 45                                     | 3                                        | 2                                        | 2+ (Liver)                             | 1.1                                     | ER+/PR-/HER2-                                      | ER-/PR-/HER2-                                         | 59                                        | 1738                                             |
| MGH-20     | 61                                     | 2                                        | 3                                        | 0-1+ (Lung)                            | 1.0                                     | ER-/PR-/HER2-                                      | ER-/PR-/HER2-                                         | 62                                        | 793                                              |

**Table S2. Patient Treatment History (from Metastatic Diagnosis)**

| <b>Participant ID</b> | <b>Treatment Categories</b>              | <b>Treatment Regimen</b>    | <b>Start Date</b> | <b>End Date</b> |
|-----------------------|------------------------------------------|-----------------------------|-------------------|-----------------|
| MGH-18                | Chemotherapy, Precision/Targeted therapy | eribulin, PD-1 inhibitor    | 34                | 125             |
|                       | Chemotherapy                             | Platinum, ATR inhibitor     | 157               | 178             |
|                       | Chemotherapy                             | ADC (trop-2)                | 252               | 504             |
|                       | Chemotherapy                             | navelbine                   | 511               | 553             |
|                       | Chemotherapy                             | doxorubicin                 | 567               | 567             |
|                       | Chemotherapy                             | capecitabine                | 575               | 595             |
| MGH-19                | Hormone/Endocrine therapy                | SERD                        | 133               | 225             |
|                       | Chemotherapy                             | doxorubicin                 | 255               | 437             |
|                       | Chemotherapy                             | capecitabine, herceptin     | 498               | 1016            |
|                       | Chemotherapy                             | CMF                         | 1016              | 1108            |
|                       | Chemotherapy                             | paclitaxel                  | 1108              | 1188            |
|                       | Chemotherapy                             | ADC (trop-2)                | 1244              | 1393            |
|                       | Chemotherapy                             | eribulin                    | 1428              | 1456            |
|                       | Precision/Targeted therapy               | PI3K inhibitor              | 1477              | 1587            |
|                       | Chemotherapy                             | eribulin                    | 1589              | 1638            |
| Chemotherapy          | cisplatin                                | 1659                        | 1659              |                 |
| MGH-20                | Precision/Targeted therapy               | mTOR inhibitor              | 0                 | 396             |
|                       | Chemotherapy, Precision/Targeted therapy | doxorubicin, mTOR inhibitor | 410               | 473             |
|                       | Chemotherapy, Precision/Targeted therapy | carboplatin, mTOR inhibitor | 473               | 562             |
|                       | Precision/Targeted therapy               | mTOR inhibitor              | 606               | 685             |
|                       | Chemotherapy                             | ADC (trop-2)                | 713               | 746             |

**Table S3. Somatic mutations by phylogeny cluster (see Fig. 2B)**

| Case Series | Phylogenic Tree Cluster | Branch                           | Lesion Site/Location | Hugo Gene Symbol | Chromoso me | Start_positi on | Reference Allele | Tumor_Se q_Allele | t_ref_count Reads | t_alt_count Reads | Protein_chang e | Variant_Classification | Variant_Type | Cancer Cell Fraction (CCF) |
|-------------|-------------------------|----------------------------------|----------------------|------------------|-------------|-----------------|------------------|-------------------|-------------------|-------------------|-----------------|------------------------|--------------|----------------------------|
| Pre-SG      | 1                       | Primary Breast                   | ACPP                 | 3                | 132036379   | G               | T                |                   | 17                | 9                 | p.D27Y          | Missense_Mutation      | SNP          | 0.99                       |
| A           | 1                       | Hilar LN II                      | ACPP                 | 3                | 132036379   | G               | T                |                   | 125               | 70                | p.D27Y          | Missense_Mutation      | SNP          | 1                          |
| B           | 1                       | Hilar LN                         | ACPP                 | 3                | 132036379   | G               | T                |                   | 160               | 61                | p.D27Y          | Missense_Mutation      | SNP          | 0.98                       |
| C           | 1                       | Inferior Liver                   | ACPP                 | 3                | 132036379   | G               | T                |                   | 178               | 64                | p.D27Y          | Missense_Mutation      | SNP          | 0.99                       |
| D           | 1                       | Inferior Liver II                | ACPP                 | 3                | 132036379   | G               | T                |                   | 207               | 120               | p.D27Y          | Missense_Mutation      | SNP          | 1                          |
| E           | 1                       | Chest Wall Subcutaneous          | ACPP                 | 3                | 132036379   | G               | T                |                   | 225               | 37                | p.D27Y          | Missense_Mutation      | SNP          | 1                          |
| F           | 1                       | RP Peri-aortic LN                | ACPP                 | 3                | 132036379   | G               | T                |                   | 123               | 55                | p.D27Y          | Missense_Mutation      | SNP          | 1                          |
| G           | 1                       | RP Peri-aortic LN II             | ACPP                 | 3                | 132036379   | G               | T                |                   | 154               | 76                | p.D27Y          | Missense_Mutation      | SNP          | 1                          |
| H           | 1                       | L. Inf. Frontal Lobe             | ACPP                 | 3                | 132036379   | G               | T                |                   | 196               | 44                | p.D27Y          | Missense_Mutation      | SNP          | 1                          |
| I           | 1                       | Medial Temp. Lobe (White Matter) | ACPP                 | 3                | 132036379   | G               | T                |                   | 192               | 140               | p.D27Y          | Missense_Mutation      | SNP          | 1                          |
| Pre-SG      | 1                       | Primary Breast                   | ALG6                 | 1                | 63870168    | G               | C                |                   | 24                | 21                | p.R101P         | Missense_Mutation      | SNP          | 0.99                       |
| A           | 1                       | Hilar LN II                      | ALG6                 | 1                | 63870168    | G               | C                |                   | 136               | 91                | p.R101P         | Missense_Mutation      | SNP          | 1                          |
| B           | 1                       | Hilar LN                         | ALG6                 | 1                | 63870168    | G               | C                |                   | 155               | 61                | p.R101P         | Missense_Mutation      | SNP          | 0.98                       |
| C           | 1                       | Inferior Liver                   | ALG6                 | 1                | 63870168    | G               | C                |                   | 121               | 60                | p.R101P         | Missense_Mutation      | SNP          | 0.99                       |
| D           | 1                       | Inferior Liver II                | ALG6                 | 1                | 63870168    | G               | C                |                   | 231               | 141               | p.R101P         | Missense_Mutation      | SNP          | 1                          |
| E           | 1                       | Chest Wall Subcutaneous          | ALG6                 | 1                | 63870168    | G               | C                |                   | 215               | 45                | p.R101P         | Missense_Mutation      | SNP          | 1                          |
| F           | 1                       | RP Peri-aortic LN                | ALG6                 | 1                | 63870168    | G               | C                |                   | 78                | 28                | p.R101P         | Missense_Mutation      | SNP          | 1                          |
| G           | 1                       | RP Peri-aortic LN II             | ALG6                 | 1                | 63870168    | G               | C                |                   | 134               | 78                | p.R101P         | Missense_Mutation      | SNP          | 1                          |
| H           | 1                       | L. Inf. Frontal Lobe             | ALG6                 | 1                | 63870168    | G               | C                |                   | 239               | 38                | p.R101P         | Missense_Mutation      | SNP          | 1                          |
| I           | 1                       | Medial Temp. Lobe (White Matter) | ALG6                 | 1                | 63870168    | G               | C                |                   | 109               | 77                | p.R101P         | Missense_Mutation      | SNP          | 1                          |
| Pre-SG      | 1                       | Primary Breast                   | ATPAF1               | 1                | 47133831    | C               | T                |                   | 62                | 8                 | p.R55Q          | Missense_Mutation      | SNP          | 0.99                       |
| A           | 1                       | Hilar LN II                      | ATPAF1               | 1                | 47133831    | C               | T                |                   | 147               | 37                | p.R55Q          | Missense_Mutation      | SNP          | 1                          |
| B           | 1                       | Hilar LN                         | ATPAF1               | 1                | 47133831    | C               | T                |                   | 112               | 31                | p.R55Q          | Missense_Mutation      | SNP          | 0.98                       |
| C           | 1                       | Inferior Liver                   | ATPAF1               | 1                | 47133831    | C               | T                |                   | 158               | 30                | p.R55Q          | Missense_Mutation      | SNP          | 0.99                       |
| D           | 1                       | Inferior Liver II                | ATPAF1               | 1                | 47133831    | C               | T                |                   | 109               | 63                | p.R55Q          | Missense_Mutation      | SNP          | 1                          |
| E           | 1                       | Chest Wall Subcutaneous          | ATPAF1               | 1                | 47133831    | C               | T                |                   | 116               | 13                | p.R55Q          | Missense_Mutation      | SNP          | 1                          |
| F           | 1                       | RP Peri-aortic LN                | ATPAF1               | 1                | 47133831    | C               | T                |                   | 173               | 31                | p.R55Q          | Missense_Mutation      | SNP          | 1                          |
| G           | 1                       | RP Peri-aortic LN II             | ATPAF1               | 1                | 47133831    | C               | T                |                   | 189               | 47                | p.R55Q          | Missense_Mutation      | SNP          | 1                          |
| H           | 1                       | L. Inf. Frontal Lobe             | ATPAF1               | 1                | 47133831    | C               | T                |                   | 126               | 27                | p.R55Q          | Missense_Mutation      | SNP          | 1                          |
| I           | 1                       | Medial Temp. Lobe (White Matter) | ATPAF1               | 1                | 47133831    | C               | T                |                   | 343               | 100               | p.R55Q          | Missense_Mutation      | SNP          | 1                          |
| Pre-SG      | 1                       | Primary Breast                   | ATXN1                | 6                | 16328229    | C               | T                |                   | 6                 | 2                 | p.A105T         | Missense_Mutation      | SNP          | 0.99                       |
| A           | 1                       | Hilar LN II                      | ATXN1                | 6                | 16328229    | C               | T                |                   | 59                | 49                | p.A105T         | Missense_Mutation      | SNP          | 1                          |
| B           | 1                       | Hilar LN                         | ATXN1                | 6                | 16328229    | C               | T                |                   | 76                | 36                | p.A105T         | Missense_Mutation      | SNP          | 0.98                       |
| C           | 1                       | Inferior Liver                   | ATXN1                | 6                | 16328229    | C               | T                |                   | 92                | 46                | p.A105T         | Missense_Mutation      | SNP          | 0.99                       |
| D           | 1                       | Inferior Liver II                | ATXN1                | 6                | 16328229    | C               | T                |                   | 71                | 55                | p.A105T         | Missense_Mutation      | SNP          | 1                          |
| E           | 1                       | Chest Wall Subcutaneous          | ATXN1                | 6                | 16328229    | C               | T                |                   | 121               | 15                | p.A105T         | Missense_Mutation      | SNP          | 1                          |
| F           | 1                       | RP Peri-aortic LN                | ATXN1                | 6                | 16328229    | C               | T                |                   | 70                | 52                | p.A105T         | Missense_Mutation      | SNP          | 1                          |
| G           | 1                       | RP Peri-aortic LN II             | ATXN1                | 6                | 16328229    | C               | T                |                   | 73                | 47                | p.A105T         | Missense_Mutation      | SNP          | 1                          |
| H           | 1                       | L. Inf. Frontal Lobe             | ATXN1                | 6                | 16328229    | C               | T                |                   | 87                | 21                | p.A105T         | Missense_Mutation      | SNP          | 1                          |
| I           | 1                       | Medial Temp. Lobe (White Matter) | ATXN1                | 6                | 16328229    | C               | T                |                   | 177               | 65                | p.A105T         | Missense_Mutation      | SNP          | 1                          |
| Pre-SG      | 1                       | Primary Breast                   | BAG1                 | 9                | 33264679    | A               | C                |                   | 4                 | 4                 | NA              | 5'UTR                  | SNP          | 0.99                       |
| A           | 1                       | Hilar LN II                      | BAG1                 | 9                | 33264679    | A               | C                |                   | 5                 | 4                 | NA              | 5'UTR                  | SNP          | 1                          |
| B           | 1                       | Hilar LN                         | BAG1                 | 9                | 33264679    | A               | C                |                   | 9                 | 3                 | NA              | 5'UTR                  | SNP          | 0.98                       |
| C           | 1                       | Inferior Liver                   | BAG1                 | 9                | 33264679    | A               | C                |                   | 11                | 4                 | NA              | 5'UTR                  | SNP          | 0.99                       |
| D           | 1                       | Inferior Liver II                | BAG1                 | 9                | 33264679    | A               | C                |                   | 6                 | 13                | NA              | 5'UTR                  | SNP          | 1                          |
| E           | 1                       | Chest Wall Subcutaneous          | BAG1                 | 9                | 33264679    | A               | C                |                   | 14                | 2                 | NA              | 5'UTR                  | SNP          | 1                          |
| F           | 1                       | RP Peri-aortic LN                | BAG1                 | 9                | 33264679    | A               | C                |                   | 9                 | 5                 | NA              | 5'UTR                  | SNP          | 1                          |
| G           | 1                       | RP Peri-aortic LN II             | BAG1                 | 9                | 33264679    | A               | C                |                   | 6                 | 9                 | NA              | 5'UTR                  | SNP          | 1                          |
| H           | 1                       | L. Inf. Frontal Lobe             | BAG1                 | 9                | 33264679    | A               | C                |                   | 18                | 1                 | NA              | 5'UTR                  | SNP          | 1                          |
| I           | 1                       | Medial Temp. Lobe (White Matter) | BAG1                 | 9                | 33264679    | A               | C                |                   | 23                | 11                | NA              | 5'UTR                  | SNP          | 1                          |
| Pre-SG      | 1                       | Primary Breast                   | C12orf36             | 12               | 13527829    | C               | A                |                   | 10                | 5                 | NA              | Intron                 | SNP          | 0.99                       |
| A           | 1                       | Hilar LN II                      | C12orf36             | 12               | 13527829    | C               | A                |                   | 56                | 34                | NA              | Intron                 | SNP          | 1                          |
| B           | 1                       | Hilar LN                         | C12orf36             | 12               | 13527829    | C               | A                |                   | 86                | 25                | NA              | Intron                 | SNP          | 0.98                       |
| C           | 1                       | Inferior Liver                   | C12orf36             | 12               | 13527829    | C               | A                |                   | 82                | 14                | NA              | Intron                 | SNP          | 0.99                       |
| D           | 1                       | Inferior Liver II                | C12orf36             | 12               | 13527829    | C               | A                |                   | 67                | 12                | NA              | Intron                 | SNP          | 1                          |
| E           | 1                       | Chest Wall Subcutaneous          | C12orf36             | 12               | 13527829    | C               | A                |                   | 109               | 13                | NA              | Intron                 | SNP          | 1                          |
| F           | 1                       | RP Peri-aortic LN                | C12orf36             | 12               | 13527829    | C               | A                |                   | 54                | 28                | NA              | Intron                 | SNP          | 1                          |
| G           | 1                       | RP Peri-aortic LN II             | C12orf36             | 12               | 13527829    | C               | A                |                   | 59                | 30                | NA              | Intron                 | SNP          | 1                          |
| H           | 1                       | L. Inf. Frontal Lobe             | C12orf36             | 12               | 13527829    | C               | A                |                   | 96                | 15                | NA              | Intron                 | SNP          | 1                          |
| I           | 1                       | Medial Temp. Lobe (White Matter) | C12orf36             | 12               | 13527829    | C               | A                |                   | 84                | 51                | NA              | Intron                 | SNP          | 1                          |
| Pre-SG      | 1                       | Primary Breast                   | C2orf74              | 2                | 61390218    | C               | T                |                   | 13                | 3                 | p.P88S          | Missense_Mutation      | SNP          | 0.99                       |
| A           | 1                       | Hilar LN II                      | C2orf74              | 2                | 61390218    | C               | T                |                   | 54                | 47                | p.P88S          | Missense_Mutation      | SNP          | 1                          |
| B           | 1                       | Hilar LN                         | C2orf74              | 2                | 61390218    | C               | T                |                   | 102               | 41                | p.P88S          | Missense_Mutation      | SNP          | 0.98                       |
| C           | 1                       | Inferior Liver                   | C2orf74              | 2                | 61390218    | C               | T                |                   | 81                | 27                | p.P88S          | Missense_Mutation      | SNP          | 0.99                       |
| D           | 1                       | Inferior Liver II                | C2orf74              | 2                | 61390218    | C               | T                |                   | 93                | 62                | p.P88S          | Missense_Mutation      | SNP          | 1                          |
| E           | 1                       | Chest Wall Subcutaneous          | C2orf74              | 2                | 61390218    | C               | T                |                   | 130               | 19                | p.P88S          | Missense_Mutation      | SNP          | 1                          |
| F           | 1                       | RP Peri-aortic LN                | C2orf74              | 2                | 61390218    | C               | T                |                   | 46                | 34                | p.P88S          | Missense_Mutation      | SNP          | 1                          |
| G           | 1                       | RP Peri-aortic LN II             | C2orf74              | 2                | 61390218    | C               | T                |                   | 80                | 43                | p.P88S          | Missense_Mutation      | SNP          | 1                          |
| H           | 1                       | L. Inf. Frontal Lobe             | C2orf74              | 2                | 61390218    | C               | T                |                   | 101               | 24                | p.P88S          | Missense_Mutation      | SNP          | 1                          |
| I           | 1                       | Medial Temp. Lobe (White Matter) | C2orf74              | 2                | 61390218    | C               | T                |                   | 84                | 49                | p.P88S          | Missense_Mutation      | SNP          | 1                          |
| Pre-SG      | 1                       | Primary Breast                   | CDON                 | 11               | 125853949   | T               | C                |                   | 5                 | 14                | p.D938G         | Missense_Mutation      | SNP          | 0.99                       |
| A           | 1                       | Hilar LN II                      | CDON                 | 11               | 125853949   | T               | C                |                   | 46                | 136               | p.D938G         | Missense_Mutation      | SNP          | 1                          |
| B           | 1                       | Hilar LN                         | CDON                 | 11               | 125853949   | T               | C                |                   | 165               | 48                | p.D938G         | Missense_Mutation      | SNP          | 0.98                       |
| C           | 1                       | Inferior Liver                   | CDON                 | 11               | 125853949   | T               | C                |                   | 127               | 65                | p.D938G         | Missense_Mutation      | SNP          | 0.99                       |
| D           | 1                       | Inferior Liver II                | CDON                 | 11               | 125853949   | T               | C                |                   | 97                | 216               | p.D938G         | Missense_Mutation      | SNP          | 1                          |
| E           | 1                       | Chest Wall Subcutaneous          | CDON                 | 11               | 125853949   | T               | C                |                   | 295               | 38                | p.D938G         | Missense_Mutation      | SNP          | 1                          |
| F           | 1                       | RP Peri-aortic LN                | CDON                 | 11               | 125853949   | T               | C                |                   | 108               | 80                | p.D938G         | Missense_Mutation      | SNP          | 1                          |
| G           | 1                       | RP Peri-aortic LN II             | CDON                 | 11               | 125853949   | T               | C                |                   | 98                | 134               | p.D938G         | Missense_Mutation      | SNP          | 1                          |
| H           | 1                       | L. Inf. Frontal Lobe             | CDON                 | 11               | 125853949   | T               | C                |                   | 233               | 80                | p.D938G         | Missense_Mutation      | SNP          | 1                          |
| I           | 1                       | Medial Temp. Lobe (White Matter) | CDON                 | 11               | 125853949   | T               | C                |                   | 74                | 187               | p.D938G         | Missense_Mutation      | SNP          | 1                          |
| Pre-SG      | 1                       | Primary Breast                   | CDON                 | 11               | 125853950   | C               | A                |                   | 7                 | 13                | p.D938Y         | Missense_Mutation      | SNP          | 0.99                       |
| A           | 1                       | Hilar LN II                      | CDON                 | 11               | 125853950   | C               | A                |                   | 47                | 134               | p.D938Y         | Missense_Mutation      | SNP          | 1                          |
| B           | 1                       | Hilar LN                         | CDON                 | 11               | 125853950   | C               | A                |                   | 162               | 49                | p.D938Y         | Missense_Mutation      | SNP          | 0.98                       |
| C           | 1                       | Inferior Liver                   | CDON                 | 11               | 125853950   | C               | A                |                   | 124               | 67                | p.D938Y         | Missense_Mutation      | SNP          | 0.99                       |
| D           | 1                       | Inferior Liver II                | CDON                 | 11               | 125853950   | C               | A                |                   | 99                | 216               | p.D938Y         | Missense_Mutation      | SNP          | 1                          |
| E           | 1                       | Chest Wall Subcutaneous          | CDON                 | 11               | 125853950   | C               | A                |                   | 303               | 37                | p.D938Y         | Missense_Mutation      | SNP          | 1                          |
| F           | 1                       | RP Peri-aortic LN                | CDON                 | 11               | 125853950   | C               | A                |                   | 107               | 79                | p.D938Y         | Missense_Mutation      | SNP          | 1                          |
| G           | 1                       | RP Peri-aortic LN II             | CDON                 | 11               | 125853950   | C               | A                |                   | 99                | 132               | p.D938Y         | Missense_Mutation      | SNP          | 1                          |
| H           | 1                       | L. Inf. Frontal Lobe             | CDON                 | 11               | 125853950   | C               | A                |                   | 232               | 85                | p.D938Y         | Missense_Mutation      | SNP          | 1                          |
| I           | 1                       | Medial Temp. Lobe (White Matter) | CDON                 | 11               | 125853950   | C               | A                |                   | 75                | 186               | p.D938Y         | Missense_Mutation      | SNP          | 1                          |
| Pre-SG      | 1                       | Primary Breast                   | CFHR1                | 1                | 196801077   | G               | T                |                   | 54                | 21                | p.R314L         | Missense_Mutation      | SNP          | 0.99                       |
| A           | 1                       | Hilar LN II                      | CFHR1                | 1                | 196801077   | G               | T                |                   | 394               | 162               | p.R314L         | Missense_Mutation      | SNP          | 1                          |
| B           | 1                       | Hilar LN                         | CFHR1                | 1                | 196801077   | G               | T                |                   | 288               | 71                | p.R314L         | Missense_Mutation      | SNP          | 0.98                       |
| C           | 1                       | Inferior Liver                   | CFHR1                | 1                | 196801077   | G               | T                |                   | 261               | 118               | p.R314L         | Missense_Mutation      | SNP          | 0.99                       |
| D           | 1                       | Inferior Liver II                | CFHR1                | 1                | 196801077   | G               | T                |                   | 464               | 125               | p.R314L         | Missense_Mutation      | SNP          | 1                          |
| E           | 1                       | Chest Wall Subcutaneous          | CFHR1                | 1                | 196801077   | G               | T                |                   | 431               | 33                | p.R314L         | Missense_Mutation      | SNP          | 1                          |
| F           | 1                       | RP Peri-aortic LN                | CFHR1                | 1                | 196801077   | G               | T                |                   | 207               | 40                | p.R314L         | Missense_Mutation      | SNP          | 1                          |
| G           | 1                       | RP Peri-aortic LN II             | CFHR1                | 1                | 196801077   | G               | T                |                   | 294               | 117               | p.R314L         | Missense_Mutation      | SNP          | 1                          |
| H           | 1                       | L. Inf. Frontal Lobe             | CFHR1                | 1                | 196801077   | G               | T                |                   | 404               | 117               | p.R314L         | Missense_Mutation      | SNP          | 1                          |
| I           | 1                       | Medial Temp. Lobe (White Matter) | CFHR1                | 1                | 196801077   | G               | T                |                   | 297               | 130               | p.R314L         | Missense_Mutation      | SNP          | 1                          |
| Pre-SG      | 1                       | Primary Breast                   | COL3A1               | 2                | 189859303   | G               | A                |                   | 37                | 20                | p.G444R         | Missense_Mutation      | SNP          | 0.99                       |

|        |   |                                  |          |    |           |   |   |     |     |         |                   |     |      |
|--------|---|----------------------------------|----------|----|-----------|---|---|-----|-----|---------|-------------------|-----|------|
| A      | 1 | Hilar LN II                      | COL3A1   | 2  | 189859303 | G | A | 200 | 144 | p.G444R | Missense_Mutation | SNP | 1    |
| B      | 1 | Hilar LN                         | COL3A1   | 2  | 189859303 | G | A | 252 | 93  | p.G444R | Missense_Mutation | SNP | 0.98 |
| C      | 1 | Inferior Liver                   | COL3A1   | 2  | 189859303 | G | A | 252 | 62  | p.G444R | Missense_Mutation | SNP | 0.99 |
| D      | 1 | Inferior Liver II                | COL3A1   | 2  | 189859303 | G | A | 250 | 151 | p.G444R | Missense_Mutation | SNP | 1    |
| E      | 1 | Chest Wall Subcutaneous          | COL3A1   | 2  | 189859303 | G | A | 365 | 39  | p.G444R | Missense_Mutation | SNP | 1    |
| F      | 1 | RP Peri-aortic LN                | COL3A1   | 2  | 189859303 | G | A | 231 | 96  | p.G444R | Missense_Mutation | SNP | 1    |
| G      | 1 | RP Peri-aortic LN II             | COL3A1   | 2  | 189859303 | G | A | 210 | 105 | p.G444R | Missense_Mutation | SNP | 1    |
| H      | 1 | L. Inf. Frontal Lobe             | COL3A1   | 2  | 189859303 | G | A | 309 | 51  | p.G444R | Missense_Mutation | SNP | 1    |
| I      | 1 | Medial Temp. Lobe (White Matter) | COL3A1   | 2  | 189859303 | G | A | 218 | 139 | p.G444R | Missense_Mutation | SNP | 1    |
| Pre-SG | 1 | Primary Breast                   | EFHC1    | 6  | 52357317  | C | T | 15  | 6   | NA      | 3'UTR             | SNP | 0.99 |
| A      | 1 | Hilar LN II                      | EFHC1    | 6  | 52357317  | C | T | 44  | 31  | NA      | 3'UTR             | SNP | 1    |
| B      | 1 | Hilar LN                         | EFHC1    | 6  | 52357317  | C | T | 80  | 10  | NA      | 3'UTR             | SNP | 0.98 |
| C      | 1 | Inferior Liver                   | EFHC1    | 6  | 52357317  | C | T | 63  | 19  | NA      | 3'UTR             | SNP | 0.99 |
| D      | 1 | Inferior Liver II                | EFHC1    | 6  | 52357317  | C | T | 76  | 48  | NA      | 3'UTR             | SNP | 1    |
| E      | 1 | Chest Wall Subcutaneous          | EFHC1    | 6  | 52357317  | C | T | 85  | 11  | NA      | 3'UTR             | SNP | 1    |
| F      | 1 | RP Peri-aortic LN                | EFHC1    | 6  | 52357317  | C | T | 32  | 15  | NA      | 3'UTR             | SNP | 1    |
| G      | 1 | RP Peri-aortic LN II             | EFHC1    | 6  | 52357317  | C | T | 49  | 29  | NA      | 3'UTR             | SNP | 1    |
| H      | 1 | L. Inf. Frontal Lobe             | EFHC1    | 6  | 52357317  | C | T | 68  | 9   | NA      | 3'UTR             | SNP | 1    |
| I      | 1 | Medial Temp. Lobe (White Matter) | EFHC1    | 6  | 52357317  | C | T | 39  | 26  | NA      | 3'UTR             | SNP | 1    |
| Pre-SG | 1 | Primary Breast                   | ERAP1    | 5  | 96136613  | G | C | 14  | 25  | p.I205M | Missense_Mutation | SNP | 0.99 |
| A      | 1 | Hilar LN II                      | ERAP1    | 5  | 96136613  | G | C | 90  | 154 | p.I205M | Missense_Mutation | SNP | 1    |
| B      | 1 | Hilar LN                         | ERAP1    | 5  | 96136613  | G | C | 187 | 149 | p.I205M | Missense_Mutation | SNP | 0.98 |
| C      | 1 | Inferior Liver                   | ERAP1    | 5  | 96136613  | G | C | 109 | 121 | p.I205M | Missense_Mutation | SNP | 0.99 |
| D      | 1 | Inferior Liver II                | ERAP1    | 5  | 96136613  | G | C | 110 | 229 | p.I205M | Missense_Mutation | SNP | 1    |
| E      | 1 | Chest Wall Subcutaneous          | ERAP1    | 5  | 96136613  | G | C | 387 | 85  | p.I205M | Missense_Mutation | SNP | 1    |
| F      | 1 | RP Peri-aortic LN                | ERAP1    | 5  | 96136613  | G | C | 103 | 95  | p.I205M | Missense_Mutation | SNP | 1    |
| G      | 1 | RP Peri-aortic LN II             | ERAP1    | 5  | 96136613  | G | C | 99  | 120 | p.I205M | Missense_Mutation | SNP | 1    |
| H      | 1 | L. Inf. Frontal Lobe             | ERAP1    | 5  | 96136613  | G | C | 283 | 68  | p.I205M | Missense_Mutation | SNP | 1    |
| I      | 1 | Medial Temp. Lobe (White Matter) | ERAP1    | 5  | 96136613  | G | C | 75  | 156 | p.I205M | Missense_Mutation | SNP | 1    |
| Pre-SG | 1 | Primary Breast                   | FBXO21   | 12 | 117628239 | C | T | 12  | 6   | p.S8N   | Missense_Mutation | SNP | 0.99 |
| A      | 1 | Hilar LN II                      | FBXO21   | 12 | 117628239 | C | T | 50  | 46  | p.S8N   | Missense_Mutation | SNP | 1    |
| B      | 1 | Hilar LN                         | FBXO21   | 12 | 117628239 | C | T | 71  | 25  | p.S8N   | Missense_Mutation | SNP | 0.98 |
| C      | 1 | Inferior Liver                   | FBXO21   | 12 | 117628239 | C | T | 71  | 36  | p.S8N   | Missense_Mutation | SNP | 0.99 |
| D      | 1 | Inferior Liver II                | FBXO21   | 12 | 117628239 | C | T | 95  | 63  | p.S8N   | Missense_Mutation | SNP | 1    |
| E      | 1 | Chest Wall Subcutaneous          | FBXO21   | 12 | 117628239 | C | T | 112 | 21  | p.S8N   | Missense_Mutation | SNP | 1    |
| F      | 1 | RP Peri-aortic LN                | FBXO21   | 12 | 117628239 | C | T | 72  | 33  | p.S8N   | Missense_Mutation | SNP | 1    |
| G      | 1 | RP Peri-aortic LN II             | FBXO21   | 12 | 117628239 | C | T | 90  | 35  | p.S8N   | Missense_Mutation | SNP | 1    |
| H      | 1 | L. Inf. Frontal Lobe             | FBXO21   | 12 | 117628239 | C | T | 104 | 25  | p.S8N   | Missense_Mutation | SNP | 1    |
| I      | 1 | Medial Temp. Lobe (White Matter) | FBXO21   | 12 | 117628239 | C | T | 119 | 83  | p.S8N   | Missense_Mutation | SNP | 1    |
| Pre-SG | 1 | Primary Breast                   | FCRL2    | 1  | 157737370 | A | G | 19  | 4   | NA      | Intron            | SNP | 0.99 |
| A      | 1 | Hilar LN II                      | FCRL2    | 1  | 157737370 | A | G | 133 | 65  | NA      | Intron            | SNP | 1    |
| B      | 1 | Hilar LN                         | FCRL2    | 1  | 157737370 | A | G | 123 | 30  | NA      | Intron            | SNP | 0.98 |
| C      | 1 | Inferior Liver                   | FCRL2    | 1  | 157737370 | A | G | 152 | 58  | NA      | Intron            | SNP | 0.99 |
| D      | 1 | Inferior Liver II                | FCRL2    | 1  | 157737370 | A | G | 200 | 80  | NA      | Intron            | SNP | 1    |
| E      | 1 | Chest Wall Subcutaneous          | FCRL2    | 1  | 157737370 | A | G | 148 | 13  | NA      | Intron            | SNP | 1    |
| F      | 1 | RP Peri-aortic LN                | FCRL2    | 1  | 157737370 | A | G | 148 | 22  | NA      | Intron            | SNP | 1    |
| G      | 1 | RP Peri-aortic LN II             | FCRL2    | 1  | 157737370 | A | G | 157 | 52  | NA      | Intron            | SNP | 1    |
| H      | 1 | L. Inf. Frontal Lobe             | FCRL2    | 1  | 157737370 | A | G | 171 | 47  | NA      | Intron            | SNP | 1    |
| I      | 1 | Medial Temp. Lobe (White Matter) | FCRL2    | 1  | 157737370 | A | G | 174 | 83  | NA      | Intron            | SNP | 1    |
| Pre-SG | 1 | Primary Breast                   | GPR162   | 12 | 6933422   | C | T | 7   | 6   | NA      | 3'UTR             | SNP | 0.99 |
| A      | 1 | Hilar LN II                      | GPR162   | 12 | 6933422   | C | T | 142 | 87  | NA      | 3'UTR             | SNP | 1    |
| B      | 1 | Hilar LN                         | GPR162   | 12 | 6933422   | C | T | 173 | 80  | NA      | 3'UTR             | SNP | 0.98 |
| C      | 1 | Inferior Liver                   | GPR162   | 12 | 6933422   | C | T | 111 | 81  | NA      | 3'UTR             | SNP | 0.99 |
| D      | 1 | Inferior Liver II                | GPR162   | 12 | 6933422   | C | T | 108 | 133 | NA      | 3'UTR             | SNP | 1    |
| E      | 1 | Chest Wall Subcutaneous          | GPR162   | 12 | 6933422   | C | T | 200 | 42  | NA      | 3'UTR             | SNP | 1    |
| F      | 1 | RP Peri-aortic LN                | GPR162   | 12 | 6933422   | C | T | 177 | 67  | NA      | 3'UTR             | SNP | 1    |
| G      | 1 | RP Peri-aortic LN II             | GPR162   | 12 | 6933422   | C | T | 154 | 89  | NA      | 3'UTR             | SNP | 1    |
| H      | 1 | L. Inf. Frontal Lobe             | GPR162   | 12 | 6933422   | C | T | 218 | 53  | NA      | 3'UTR             | SNP | 1    |
| I      | 1 | Medial Temp. Lobe (White Matter) | GPR162   | 12 | 6933422   | C | T | 212 | 146 | NA      | 3'UTR             | SNP | 1    |
| Pre-SG | 1 | Primary Breast                   | INPP4B   | 4  | 142950057 | G | C | 1   | 8   | p.R885G | Missense_Mutation | SNP | 0.99 |
| A      | 1 | Hilar LN II                      | INPP4B   | 4  | 142950057 | G | C | 18  | 55  | p.R885G | Missense_Mutation | SNP | 1    |
| B      | 1 | Hilar LN                         | INPP4B   | 4  | 142950057 | G | C | 52  | 37  | p.R885G | Missense_Mutation | SNP | 0.98 |
| C      | 1 | Inferior Liver                   | INPP4B   | 4  | 142950057 | G | C | 32  | 36  | p.R885G | Missense_Mutation | SNP | 0.99 |
| D      | 1 | Inferior Liver II                | INPP4B   | 4  | 142950057 | G | C | 36  | 61  | p.R885G | Missense_Mutation | SNP | 1    |
| E      | 1 | Chest Wall Subcutaneous          | INPP4B   | 4  | 142950057 | G | C | 80  | 17  | p.R885G | Missense_Mutation | SNP | 1    |
| F      | 1 | RP Peri-aortic LN                | INPP4B   | 4  | 142950057 | G | C | 14  | 17  | p.R885G | Missense_Mutation | SNP | 1    |
| G      | 1 | RP Peri-aortic LN II             | INPP4B   | 4  | 142950057 | G | C | 22  | 28  | p.R885G | Missense_Mutation | SNP | 1    |
| H      | 1 | L. Inf. Frontal Lobe             | INPP4B   | 4  | 142950057 | G | C | 71  | 12  | p.R885G | Missense_Mutation | SNP | 1    |
| I      | 1 | Medial Temp. Lobe (White Matter) | INPP4B   | 4  | 142950057 | G | C | 19  | 38  | p.R885G | Missense_Mutation | SNP | 1    |
| Pre-SG | 1 | Primary Breast                   | KIAA2018 | 3  | 113378370 | T | A | 9   | 12  | NA      | Intron            | SNP | 0.99 |
| A      | 1 | Hilar LN II                      | KIAA2018 | 3  | 113378370 | T | A | 112 | 67  | NA      | Intron            | SNP | 1    |
| B      | 1 | Hilar LN                         | KIAA2018 | 3  | 113378370 | T | A | 189 | 27  | NA      | Intron            | SNP | 0.98 |
| C      | 1 | Inferior Liver                   | KIAA2018 | 3  | 113378370 | T | A | 142 | 58  | NA      | Intron            | SNP | 0.99 |
| D      | 1 | Inferior Liver II                | KIAA2018 | 3  | 113378370 | T | A | 163 | 88  | NA      | Intron            | SNP | 1    |
| E      | 1 | Chest Wall Subcutaneous          | KIAA2018 | 3  | 113378370 | T | A | 237 | 15  | NA      | Intron            | SNP | 1    |
| F      | 1 | RP Peri-aortic LN                | KIAA2018 | 3  | 113378370 | T | A | 71  | 48  | NA      | Intron            | SNP | 1    |
| G      | 1 | RP Peri-aortic LN II             | KIAA2018 | 3  | 113378370 | T | A | 113 | 80  | NA      | Intron            | SNP | 1    |
| H      | 1 | L. Inf. Frontal Lobe             | KIAA2018 | 3  | 113378370 | T | A | 181 | 34  | NA      | Intron            | SNP | 1    |
| I      | 1 | Medial Temp. Lobe (White Matter) | KIAA2018 | 3  | 113378370 | T | A | 122 | 85  | NA      | Intron            | SNP | 1    |
| Pre-SG | 1 | Primary Breast                   | KLF12    | 13 | 74420101  | T | C | 19  | 12  | p.N178S | Missense_Mutation | SNP | 0.99 |
| A      | 1 | Hilar LN II                      | KLF12    | 13 | 74420101  | T | C | 41  | 86  | p.N178S | Missense_Mutation | SNP | 1    |
| B      | 1 | Hilar LN                         | KLF12    | 13 | 74420101  | T | C | 129 | 29  | p.N178S | Missense_Mutation | SNP | 0.98 |
| C      | 1 | Inferior Liver                   | KLF12    | 13 | 74420101  | T | C | 87  | 79  | p.N178S | Missense_Mutation | SNP | 0.99 |
| D      | 1 | Inferior Liver II                | KLF12    | 13 | 74420101  | T | C | 72  | 83  | p.N178S | Missense_Mutation | SNP | 1    |
| E      | 1 | Chest Wall Subcutaneous          | KLF12    | 13 | 74420101  | T | C | 230 | 15  | p.N178S | Missense_Mutation | SNP | 1    |
| F      | 1 | RP Peri-aortic LN                | KLF12    | 13 | 74420101  | T | C | 83  | 96  | p.N178S | Missense_Mutation | SNP | 1    |
| G      | 1 | RP Peri-aortic LN II             | KLF12    | 13 | 74420101  | T | C | 156 | 67  | p.N178S | Missense_Mutation | SNP | 1    |
| H      | 1 | L. Inf. Frontal Lobe             | KLF12    | 13 | 74420101  | T | C | 156 | 34  | p.N178S | Missense_Mutation | SNP | 1    |
| I      | 1 | Medial Temp. Lobe (White Matter) | KLF12    | 13 | 74420101  | T | C | 45  | 107 | p.N178S | Missense_Mutation | SNP | 1    |
| Pre-SG | 1 | Primary Breast                   | KLHL36   | 16 | 84690684  | G | A | 4   | 10  | p.G91S  | Missense_Mutation | SNP | 0.99 |
| A      | 1 | Hilar LN II                      | KLHL36   | 16 | 84690684  | G | A | 30  | 143 | p.G91S  | Missense_Mutation | SNP | 1    |
| B      | 1 | Hilar LN                         | KLHL36   | 16 | 84690684  | G | A | 78  | 136 | p.G91S  | Missense_Mutation | SNP | 0.98 |
| C      | 1 | Inferior Liver                   | KLHL36   | 16 | 84690684  | G | A | 59  | 69  | p.G91S  | Missense_Mutation | SNP | 0.99 |
| D      | 1 | Inferior Liver II                | KLHL36   | 16 | 84690684  | G | A | 40  | 163 | p.G91S  | Missense_Mutation | SNP | 1    |
| E      | 1 | Chest Wall Subcutaneous          | KLHL36   | 16 | 84690684  | G | A | 145 | 53  | p.G91S  | Missense_Mutation | SNP | 1    |
| F      | 1 | RP Peri-aortic LN                | KLHL36   | 16 | 84690684  | G | A | 50  | 93  | p.G91S  | Missense_Mutation | SNP | 1    |
| G      | 1 | RP Peri-aortic LN II             | KLHL36   | 16 | 84690684  | G | A | 54  | 152 | p.G91S  | Missense_Mutation | SNP | 1    |
| H      | 1 | L. Inf. Frontal Lobe             | KLHL36   | 16 | 84690684  | G | A | 105 | 71  | p.G91S  | Missense_Mutation | SNP | 1    |
| I      | 1 | Medial Temp. Lobe (White Matter) | KLHL36   | 16 | 84690684  | G | A | 71  | 237 | p.G91S  | Missense_Mutation | SNP | 1    |
| Pre-SG | 1 | Primary Breast                   | MCMD2    | 8  | 67803085  | - | T | 19  | 9   | NA      | Intron            | INS | 0.99 |
| A      | 1 | Hilar LN II                      | MCMD2    | 8  | 67803085  | - | T | 29  | 58  | NA      | Intron            | INS | 1    |
| B      | 1 | Hilar LN                         | MCMD2    | 8  | 67803085  | - | T | 84  | 33  | NA      | Intron            | INS | 0.98 |
| C      | 1 | Inferior Liver                   | MCMD2    | 8  | 67803085  | - | T | 121 | 37  | NA      | Intron            | INS | 0.99 |
| D      | 1 | Inferior Liver II                | MCMD2    | 8  | 67803085  | - | T | 151 | 71  | NA      | Intron            | INS | 1    |
| E      | 1 | Chest Wall Subcutaneous          | MCMD2    | 8  | 67803085  | - | T | 165 | 17  | NA      | Intron            | INS | 1    |
| F      | 1 | RP Peri-aortic LN                | MCMD2    | 8  | 67803085  | - | T | 82  | 28  | NA      | Intron            | INS | 1    |

|        |   |                                  |         |    |           |   |   |     |      |          |                   |     |      |
|--------|---|----------------------------------|---------|----|-----------|---|---|-----|------|----------|-------------------|-----|------|
| G      | 1 | RP Peri-aortic LN II             | CMCDD2  | 8  | 67803085  | - | T | 122 | 45   | NA       | Intron            | INS | 1    |
| H      | 1 | L. Inf. Frontal Lobe             | CMCDD2  | 8  | 67803085  | - | T | 89  | 20   | NA       | Intron            | INS | 1    |
| I      | 1 | Medial Temp. Lobe (White Matter) | CMCDD2  | 8  | 67803085  | - | T | 31  | 29   | NA       | Intron            | INS | 1    |
| Pre-SG | 1 | Primary Breast                   | MELK    | 9  | 36583674  | G | A | 10  | 5    | p.V37I   | Missense_Mutation | SNP | 0.99 |
| A      | 1 | Hilar LN II                      | MELK    | 9  | 36583674  | G | A | 60  | 33   | p.V37I   | Missense_Mutation | SNP | 1    |
| B      | 1 | Hilar LN                         | MELK    | 9  | 36583674  | G | A | 67  | 27   | p.V37I   | Missense_Mutation | SNP | 0.98 |
| C      | 1 | Inferior Liver                   | MELK    | 9  | 36583674  | G | A | 63  | 12   | p.V37I   | Missense_Mutation | SNP | 0.99 |
| D      | 1 | Inferior Liver II                | MELK    | 9  | 36583674  | G | A | 109 | 98   | p.V37I   | Missense_Mutation | SNP | 1    |
| E      | 1 | Chest Wall Subcutaneous          | MELK    | 9  | 36583674  | G | A | 97  | 20   | p.V37I   | Missense_Mutation | SNP | 1    |
| F      | 1 | RP Peri-aortic LN                | MELK    | 9  | 36583674  | G | A | 34  | 19   | p.V37I   | Missense_Mutation | SNP | 1    |
| G      | 1 | RP Peri-aortic LN II             | MELK    | 9  | 36583674  | G | A | 66  | 52   | p.V37I   | Missense_Mutation | SNP | 1    |
| H      | 1 | L. Inf. Frontal Lobe             | MELK    | 9  | 36583674  | G | A | 112 | 15   | p.V37I   | Missense_Mutation | SNP | 1    |
| I      | 1 | Medial Temp. Lobe (White Matter) | MELK    | 9  | 36583674  | G | A | 57  | 32   | p.V37I   | Missense_Mutation | SNP | 1    |
| Pre-SG | 1 | Primary Breast                   | MROH5   | 8  | 142487972 | G | A | 9   | 13   | NA       | RNA               | SNP | 0.99 |
| A      | 1 | Hilar LN II                      | MROH5   | 8  | 142487972 | G | A | 98  | 64   | NA       | RNA               | SNP | 1    |
| B      | 1 | Hilar LN                         | MROH5   | 8  | 142487972 | G | A | 143 | 42   | NA       | RNA               | SNP | 0.98 |
| C      | 1 | Inferior Liver                   | MROH5   | 8  | 142487972 | G | A | 166 | 63   | NA       | RNA               | SNP | 0.99 |
| D      | 1 | Inferior Liver II                | MROH5   | 8  | 142487972 | G | A | 160 | 76   | NA       | RNA               | SNP | 1    |
| E      | 1 | Chest Wall Subcutaneous          | MROH5   | 8  | 142487972 | G | A | 170 | 30   | NA       | RNA               | SNP | 1    |
| F      | 1 | RP Peri-aortic LN                | MROH5   | 8  | 142487972 | G | A | 144 | 49   | NA       | RNA               | SNP | 1    |
| G      | 1 | RP Peri-aortic LN II             | MROH5   | 8  | 142487972 | G | A | 130 | 81   | NA       | RNA               | SNP | 1    |
| H      | 1 | L. Inf. Frontal Lobe             | MROH5   | 8  | 142487972 | G | A | 165 | 36   | NA       | RNA               | SNP | 1    |
| I      | 1 | Medial Temp. Lobe (White Matter) | MROH5   | 8  | 142487972 | G | A | 175 | 128  | NA       | RNA               | SNP | 1    |
| Pre-SG | 1 | Primary Breast                   | MROH7   | 1  | 55139729  | G | T | 21  | 37   | p.R614I  | Missense_Mutation | SNP | 0.99 |
| A      | 1 | Hilar LN II                      | MROH7   | 1  | 55139729  | G | T | 77  | 224  | p.R614I  | Missense_Mutation | SNP | 1    |
| B      | 1 | Hilar LN                         | MROH7   | 1  | 55139729  | G | T | 131 | 111  | p.R614I  | Missense_Mutation | SNP | 0.98 |
| C      | 1 | Inferior Liver                   | MROH7   | 1  | 55139729  | G | T | 112 | 165  | p.R614I  | Missense_Mutation | SNP | 0.99 |
| D      | 1 | Inferior Liver II                | MROH7   | 1  | 55139729  | G | T | 118 | 148  | p.R614I  | Missense_Mutation | SNP | 1    |
| E      | 1 | Chest Wall Subcutaneous          | MROH7   | 1  | 55139729  | G | T | 171 | 53   | p.R614I  | Missense_Mutation | SNP | 1    |
| F      | 1 | RP Peri-aortic LN                | MROH7   | 1  | 55139729  | G | T | 105 | 177  | p.R614I  | Missense_Mutation | SNP | 1    |
| G      | 1 | RP Peri-aortic LN II             | MROH7   | 1  | 55139729  | G | T | 107 | 224  | p.R614I  | Missense_Mutation | SNP | 1    |
| H      | 1 | L. Inf. Frontal Lobe             | MROH7   | 1  | 55139729  | G | T | 161 | 93   | p.R614I  | Missense_Mutation | SNP | 1    |
| I      | 1 | Medial Temp. Lobe (White Matter) | MROH7   | 1  | 55139729  | G | T | 111 | 294  | p.R614I  | Missense_Mutation | SNP | 1    |
| Pre-SG | 1 | Primary Breast                   | MYH13   | 17 | 10248867  | G | C | 8   | 9    | p.R444G  | Missense_Mutation | SNP | 0.99 |
| A      | 1 | Hilar LN II                      | MYH13   | 17 | 10248867  | G | C | 76  | 133  | p.R444G  | Missense_Mutation | SNP | 1    |
| B      | 1 | Hilar LN                         | MYH13   | 17 | 10248867  | G | C | 195 | 105  | p.R444G  | Missense_Mutation | SNP | 0.98 |
| C      | 1 | Inferior Liver                   | MYH13   | 17 | 10248867  | G | C | 135 | 136  | p.R444G  | Missense_Mutation | SNP | 0.99 |
| D      | 1 | Inferior Liver II                | MYH13   | 17 | 10248867  | G | C | 102 | 137  | p.R444G  | Missense_Mutation | SNP | 1    |
| E      | 1 | Chest Wall Subcutaneous          | MYH13   | 17 | 10248867  | G | C | 316 | 71   | p.R444G  | Missense_Mutation | SNP | 1    |
| F      | 1 | RP Peri-aortic LN                | MYH13   | 17 | 10248867  | G | C | 138 | 113  | p.R444G  | Missense_Mutation | SNP | 1    |
| G      | 1 | RP Peri-aortic LN II             | MYH13   | 17 | 10248867  | G | C | 121 | 126  | p.R444G  | Missense_Mutation | SNP | 1    |
| H      | 1 | L. Inf. Frontal Lobe             | MYH13   | 17 | 10248867  | G | C | 257 | 65   | p.R444G  | Missense_Mutation | SNP | 1    |
| I      | 1 | Medial Temp. Lobe (White Matter) | MYH13   | 17 | 10248867  | G | C | 67  | 148  | p.R444G  | Missense_Mutation | SNP | 1    |
| Pre-SG | 1 | Primary Breast                   | PHLDA1  | 12 | 76424565  | G | A | 4   | 4    | p.P319P  | Silent            | SNP | 0.99 |
| A      | 1 | Hilar LN II                      | PHLDA1  | 12 | 76424565  | G | A | 11  | 29   | p.P319P  | Silent            | SNP | 1    |
| B      | 1 | Hilar LN                         | PHLDA1  | 12 | 76424565  | G | A | 68  | 11   | p.P319P  | Silent            | SNP | 0.98 |
| C      | 1 | Inferior Liver                   | PHLDA1  | 12 | 76424565  | G | A | 49  | 17   | p.P319P  | Silent            | SNP | 0.99 |
| D      | 1 | Inferior Liver II                | PHLDA1  | 12 | 76424565  | G | A | 82  | 15   | p.P319P  | Silent            | SNP | 1    |
| E      | 1 | Chest Wall Subcutaneous          | PHLDA1  | 12 | 76424565  | G | A | 73  | 12   | p.P319P  | Silent            | SNP | 1    |
| F      | 1 | RP Peri-aortic LN                | PHLDA1  | 12 | 76424565  | G | A | 58  | 21   | p.P319P  | Silent            | SNP | 1    |
| G      | 1 | RP Peri-aortic LN II             | PHLDA1  | 12 | 76424565  | G | A | 39  | 19   | p.P319P  | Silent            | SNP | 1    |
| H      | 1 | L. Inf. Frontal Lobe             | PHLDA1  | 12 | 76424565  | G | A | 54  | 16   | p.P319P  | Silent            | SNP | 1    |
| I      | 1 | Medial Temp. Lobe (White Matter) | PHLDA1  | 12 | 76424565  | G | A | 18  | 55   | p.P319P  | Silent            | SNP | 1    |
| Pre-SG | 1 | Primary Breast                   | PKD1    | 16 | 2161533   | A | C | 7   | 66   | p.L1212R | Missense_Mutation | SNP | 0.99 |
| A      | 1 | Hilar LN II                      | PKD1    | 16 | 2161533   | A | C | 110 | 472  | p.L1212R | Missense_Mutation | SNP | 1    |
| B      | 1 | Hilar LN                         | PKD1    | 16 | 2161533   | A | C | 326 | 248  | p.L1212R | Missense_Mutation | SNP | 0.98 |
| C      | 1 | Inferior Liver                   | PKD1    | 16 | 2161533   | A | C | 242 | 353  | p.L1212R | Missense_Mutation | SNP | 0.99 |
| D      | 1 | Inferior Liver II                | PKD1    | 16 | 2161533   | A | C | 175 | 500  | p.L1212R | Missense_Mutation | SNP | 1    |
| E      | 1 | Chest Wall Subcutaneous          | PKD1    | 16 | 2161533   | A | C | 523 | 147  | p.L1212R | Missense_Mutation | SNP | 1    |
| F      | 1 | RP Peri-aortic LN                | PKD1    | 16 | 2161533   | A | C | 234 | 405  | p.L1212R | Missense_Mutation | SNP | 1    |
| G      | 1 | RP Peri-aortic LN II             | PKD1    | 16 | 2161533   | A | C | 180 | 503  | p.L1212R | Missense_Mutation | SNP | 1    |
| H      | 1 | L. Inf. Frontal Lobe             | PKD1    | 16 | 2161533   | A | C | 418 | 316  | p.L1212R | Missense_Mutation | SNP | 1    |
| I      | 1 | Medial Temp. Lobe (White Matter) | PKD1    | 16 | 2161533   | A | C | 212 | 1225 | p.L1212R | Missense_Mutation | SNP | 1    |
| Pre-SG | 1 | Primary Breast                   | PRPF8   | 17 | 1554478   | C | T | 23  | 35   | p.V2259V | Silent            | SNP | 0.99 |
| A      | 1 | Hilar LN II                      | PRPF8   | 17 | 1554478   | C | T | 101 | 229  | p.V2259V | Silent            | SNP | 1    |
| B      | 1 | Hilar LN                         | PRPF8   | 17 | 1554478   | C | T | 280 | 184  | p.V2259V | Silent            | SNP | 0.98 |
| C      | 1 | Inferior Liver                   | PRPF8   | 17 | 1554478   | C | T | 202 | 228  | p.V2259V | Silent            | SNP | 0.99 |
| D      | 1 | Inferior Liver II                | PRPF8   | 17 | 1554478   | C | T | 176 | 272  | p.V2259V | Silent            | SNP | 1    |
| E      | 1 | Chest Wall Subcutaneous          | PRPF8   | 17 | 1554478   | C | T | 487 | 103  | p.V2259V | Silent            | SNP | 1    |
| F      | 1 | RP Peri-aortic LN                | PRPF8   | 17 | 1554478   | C | T | 202 | 160  | p.V2259V | Silent            | SNP | 1    |
| G      | 1 | RP Peri-aortic LN II             | PRPF8   | 17 | 1554478   | C | T | 155 | 227  | p.V2259V | Silent            | SNP | 1    |
| H      | 1 | L. Inf. Frontal Lobe             | PRPF8   | 17 | 1554478   | C | T | 365 | 97   | p.V2259V | Silent            | SNP | 1    |
| I      | 1 | Medial Temp. Lobe (White Matter) | PRPF8   | 17 | 1554478   | C | T | 150 | 320  | p.V2259V | Silent            | SNP | 1    |
| Pre-SG | 1 | Primary Breast                   | RANBP3  | 19 | 5951492   | G | A | 7   | 4    | p.P65L   | Missense_Mutation | SNP | 0.99 |
| A      | 1 | Hilar LN II                      | RANBP3  | 19 | 5951492   | G | A | 64  | 60   | p.P65L   | Missense_Mutation | SNP | 1    |
| B      | 1 | Hilar LN                         | RANBP3  | 19 | 5951492   | G | A | 139 | 35   | p.P65L   | Missense_Mutation | SNP | 0.98 |
| C      | 1 | Inferior Liver                   | RANBP3  | 19 | 5951492   | G | A | 97  | 40   | p.P65L   | Missense_Mutation | SNP | 0.99 |
| D      | 1 | Inferior Liver II                | RANBP3  | 19 | 5951492   | G | A | 109 | 66   | p.P65L   | Missense_Mutation | SNP | 1    |
| E      | 1 | Chest Wall Subcutaneous          | RANBP3  | 19 | 5951492   | G | A | 111 | 18   | p.P65L   | Missense_Mutation | SNP | 1    |
| F      | 1 | RP Peri-aortic LN                | RANBP3  | 19 | 5951492   | G | A | 91  | 62   | p.P65L   | Missense_Mutation | SNP | 1    |
| G      | 1 | RP Peri-aortic LN II             | RANBP3  | 19 | 5951492   | G | A | 97  | 57   | p.P65L   | Missense_Mutation | SNP | 1    |
| H      | 1 | L. Inf. Frontal Lobe             | RANBP3  | 19 | 5951492   | G | A | 119 | 21   | p.P65L   | Missense_Mutation | SNP | 1    |
| I      | 1 | Medial Temp. Lobe (White Matter) | RANBP3  | 19 | 5951492   | G | A | 110 | 90   | p.P65L   | Missense_Mutation | SNP | 1    |
| Pre-SG | 1 | Primary Breast                   | RIMKLB  | 12 | 8866508   | C | G | 48  | 34   | p.R16G   | Missense_Mutation | SNP | 0.99 |
| A      | 1 | Hilar LN II                      | RIMKLB  | 12 | 8866508   | C | G | 205 | 126  | p.R16G   | Missense_Mutation | SNP | 1    |
| B      | 1 | Hilar LN                         | RIMKLB  | 12 | 8866508   | C | G | 306 | 71   | p.R16G   | Missense_Mutation | SNP | 0.98 |
| C      | 1 | Inferior Liver                   | RIMKLB  | 12 | 8866508   | C | G | 276 | 72   | p.R16G   | Missense_Mutation | SNP | 0.99 |
| D      | 1 | Inferior Liver II                | RIMKLB  | 12 | 8866508   | C | G | 315 | 42   | p.R16G   | Missense_Mutation | SNP | 1    |
| E      | 1 | Chest Wall Subcutaneous          | RIMKLB  | 12 | 8866508   | C | G | 387 | 45   | p.R16G   | Missense_Mutation | SNP | 1    |
| F      | 1 | RP Peri-aortic LN                | RIMKLB  | 12 | 8866508   | C | G | 161 | 65   | p.R16G   | Missense_Mutation | SNP | 1    |
| G      | 1 | RP Peri-aortic LN II             | RIMKLB  | 12 | 8866508   | C | G | 220 | 140  | p.R16G   | Missense_Mutation | SNP | 1    |
| H      | 1 | L. Inf. Frontal Lobe             | RIMKLB  | 12 | 8866508   | C | G | 305 | 39   | p.R16G   | Missense_Mutation | SNP | 1    |
| I      | 1 | Medial Temp. Lobe (White Matter) | RIMKLB  | 12 | 8866508   | C | G | 242 | 127  | p.R16G   | Missense_Mutation | SNP | 1    |
| Pre-SG | 1 | Primary Breast                   | SAMD4A  | 14 | 55203737  | T | C | 17  | 18   | NA       | Intron            | SNP | 0.99 |
| A      | 1 | Hilar LN II                      | SAMD4A  | 14 | 55203737  | T | C | 61  | 138  | NA       | Intron            | SNP | 1    |
| B      | 1 | Hilar LN                         | SAMD4A  | 14 | 55203737  | T | C | 207 | 117  | NA       | Intron            | SNP | 0.98 |
| C      | 1 | Inferior Liver                   | SAMD4A  | 14 | 55203737  | T | C | 110 | 114  | NA       | Intron            | SNP | 0.99 |
| D      | 1 | Inferior Liver II                | SAMD4A  | 14 | 55203737  | T | C | 122 | 149  | NA       | Intron            | SNP | 1    |
| E      | 1 | Chest Wall Subcutaneous          | SAMD4A  | 14 | 55203737  | T | C | 325 | 58   | NA       | Intron            | SNP | 1    |
| F      | 1 | RP Peri-aortic LN                | SAMD4A  | 14 | 55203737  | T | C | 128 | 128  | NA       | Intron            | SNP | 1    |
| G      | 1 | RP Peri-aortic LN II             | SAMD4A  | 14 | 55203737  | T | C | 92  | 154  | NA       | Intron            | SNP | 1    |
| H      | 1 | L. Inf. Frontal Lobe             | SAMD4A  | 14 | 55203737  | T | C | 261 | 67   | NA       | Intron            | SNP | 1    |
| I      | 1 | Medial Temp. Lobe (White Matter) | SAMD4A  | 14 | 55203737  | T | C | 87  | 195  | NA       | Intron            | SNP | 1    |
| Pre-SG | 1 | Primary Breast                   | SEC14L4 | 22 | 30890129  | G | C | 3   | 11   | NA       | Intron            | SNP | 0.99 |
| A      | 1 | Hilar LN II                      | SEC14L4 | 22 | 30890129  | G | C | 23  | 72   | NA       | Intron            | SNP | 1    |
| B      | 1 | Hilar LN                         | SEC14L4 | 22 | 30890129  | G | C | 70  | 46   | NA       | Intron            | SNP | 0.98 |

|        |   |                                  |         |    |           |   |   |     |     |         |                   |     |      |
|--------|---|----------------------------------|---------|----|-----------|---|---|-----|-----|---------|-------------------|-----|------|
| C      | 1 | Inferior Liver                   | SEC14L4 | 22 | 30890129  | G | C | 45  | 55  | NA      | Intron            | SNP | 0.99 |
| D      | 1 | Inferior Liver II                | SEC14L4 | 22 | 30890129  | G | C | 41  | 66  | NA      | Intron            | SNP | 1    |
| E      | 1 | Chest Wall Subcutaneous          | SEC14L4 | 22 | 30890129  | G | C | 125 | 21  | NA      | Intron            | SNP | 1    |
| F      | 1 | RP Peri-aortic LN                | SEC14L4 | 22 | 30890129  | G | C | 46  | 43  | NA      | Intron            | SNP | 1    |
| G      | 1 | RP Peri-aortic LN II             | SEC14L4 | 22 | 30890129  | G | C | 52  | 47  | NA      | Intron            | SNP | 1    |
| H      | 1 | L. Inf. Frontal Lobe             | SEC14L4 | 22 | 30890129  | G | C | 98  | 25  | NA      | Intron            | SNP | 1    |
| I      | 1 | Medial Temp. Lobe (White Matter) | SEC14L4 | 22 | 30890129  | G | C | 27  | 79  | NA      | Intron            | SNP | 1    |
| Pre-SG | 1 | Primary Breast                   | SMARCA4 | 19 | 11106026  | G | T | 37  | 19  | NA      | Intron            | SNP | 0.99 |
| A      | 1 | Hilar LN II                      | SMARCA4 | 19 | 11106026  | G | T | 216 | 163 | NA      | Intron            | SNP | 1    |
| B      | 1 | Hilar LN                         | SMARCA4 | 19 | 11106026  | G | T | 329 | 104 | NA      | Intron            | SNP | 0.98 |
| C      | 1 | Inferior Liver                   | SMARCA4 | 19 | 11106026  | G | T | 350 | 151 | NA      | Intron            | SNP | 0.99 |
| D      | 1 | Inferior Liver II                | SMARCA4 | 19 | 11106026  | G | T | 291 | 158 | NA      | Intron            | SNP | 1    |
| E      | 1 | Chest Wall Subcutaneous          | SMARCA4 | 19 | 11106026  | G | T | 378 | 75  | NA      | Intron            | SNP | 1    |
| F      | 1 | RP Peri-aortic LN                | SMARCA4 | 19 | 11106026  | G | T | 263 | 119 | NA      | Intron            | SNP | 1    |
| G      | 1 | RP Peri-aortic LN II             | SMARCA4 | 19 | 11106026  | G | T | 263 | 149 | NA      | Intron            | SNP | 1    |
| H      | 1 | L. Inf. Frontal Lobe             | SMARCA4 | 19 | 11106026  | G | T | 351 | 88  | NA      | Intron            | SNP | 1    |
| I      | 1 | Medial Temp. Lobe (White Matter) | SMARCA4 | 19 | 11106026  | G | T | 403 | 263 | NA      | Intron            | SNP | 1    |
| Pre-SG | 1 | Primary Breast                   | SPTA1   | 1  | 158641228 | C | A | 86  | 21  | p.E502* | Nonsense_Mutation | SNP | 0.99 |
| A      | 1 | Hilar LN II                      | SPTA1   | 1  | 158641228 | C | A | 457 | 167 | p.E502* | Nonsense_Mutation | SNP | 1    |
| B      | 1 | Hilar LN                         | SPTA1   | 1  | 158641228 | C | A | 325 | 128 | p.E502* | Nonsense_Mutation | SNP | 0.98 |
| C      | 1 | Inferior Liver                   | SPTA1   | 1  | 158641228 | C | A | 468 | 125 | p.E502* | Nonsense_Mutation | SNP | 0.99 |
| D      | 1 | Inferior Liver II                | SPTA1   | 1  | 158641228 | C | A | 542 | 189 | p.E502* | Nonsense_Mutation | SNP | 1    |
| E      | 1 | Chest Wall Subcutaneous          | SPTA1   | 1  | 158641228 | C | A | 475 | 100 | p.E502* | Nonsense_Mutation | SNP | 1    |
| F      | 1 | RP Peri-aortic LN                | SPTA1   | 1  | 158641228 | C | A | 319 | 101 | p.E502* | Nonsense_Mutation | SNP | 1    |
| G      | 1 | RP Peri-aortic LN II             | SPTA1   | 1  | 158641228 | C | A | 477 | 143 | p.E502* | Nonsense_Mutation | SNP | 1    |
| H      | 1 | L. Inf. Frontal Lobe             | SPTA1   | 1  | 158641228 | C | A | 584 | 83  | p.E502* | Nonsense_Mutation | SNP | 1    |
| I      | 1 | Medial Temp. Lobe (White Matter) | SPTA1   | 1  | 158641228 | C | A | 573 | 188 | p.E502* | Nonsense_Mutation | SNP | 1    |
| Pre-SG | 1 | Primary Breast                   | TAS2R20 | 12 | 11150248  | G | C | 8   | 2   | p.S76C  | Missense_Mutation | SNP | 0.99 |
| A      | 1 | Hilar LN II                      | TAS2R20 | 12 | 11150248  | G | C | 68  | 53  | p.S76C  | Missense_Mutation | SNP | 1    |
| B      | 1 | Hilar LN                         | TAS2R20 | 12 | 11150248  | G | C | 69  | 33  | p.S76C  | Missense_Mutation | SNP | 0.98 |
| C      | 1 | Inferior Liver                   | TAS2R20 | 12 | 11150248  | G | C | 43  | 31  | p.S76C  | Missense_Mutation | SNP | 0.99 |
| D      | 1 | Inferior Liver II                | TAS2R20 | 12 | 11150248  | G | C | 53  | 52  | p.S76C  | Missense_Mutation | SNP | 1    |
| E      | 1 | Chest Wall Subcutaneous          | TAS2R20 | 12 | 11150248  | G | C | 90  | 23  | p.S76C  | Missense_Mutation | SNP | 1    |
| F      | 1 | RP Peri-aortic LN                | TAS2R20 | 12 | 11150248  | G | C | 42  | 11  | p.S76C  | Missense_Mutation | SNP | 1    |
| G      | 1 | RP Peri-aortic LN II             | TAS2R20 | 12 | 11150248  | G | C | 63  | 41  | p.S76C  | Missense_Mutation | SNP | 1    |
| H      | 1 | L. Inf. Frontal Lobe             | TAS2R20 | 12 | 11150248  | G | C | 108 | 19  | p.S76C  | Missense_Mutation | SNP | 1    |
| I      | 1 | Medial Temp. Lobe (White Matter) | TAS2R20 | 12 | 11150248  | G | C | 53  | 26  | p.S76C  | Missense_Mutation | SNP | 1    |
| Pre-SG | 1 | Primary Breast                   | THEM6   | 8  | 143808967 | C | G | 50  | 25  | p.A68G  | Missense_Mutation | SNP | 0.99 |
| A      | 1 | Hilar LN II                      | THEM6   | 8  | 143808967 | C | G | 155 | 115 | p.A68G  | Missense_Mutation | SNP | 1    |
| B      | 1 | Hilar LN                         | THEM6   | 8  | 143808967 | C | G | 223 | 48  | p.A68G  | Missense_Mutation | SNP | 0.98 |
| C      | 1 | Inferior Liver                   | THEM6   | 8  | 143808967 | C | G | 216 | 184 | p.A68G  | Missense_Mutation | SNP | 0.99 |
| D      | 1 | Inferior Liver II                | THEM6   | 8  | 143808967 | C | G | 278 | 199 | p.A68G  | Missense_Mutation | SNP | 1    |
| E      | 1 | Chest Wall Subcutaneous          | THEM6   | 8  | 143808967 | C | G | 263 | 23  | p.A68G  | Missense_Mutation | SNP | 1    |
| F      | 1 | RP Peri-aortic LN                | THEM6   | 8  | 143808967 | C | G | 235 | 145 | p.A68G  | Missense_Mutation | SNP | 1    |
| G      | 1 | RP Peri-aortic LN II             | THEM6   | 8  | 143808967 | C | G | 226 | 107 | p.A68G  | Missense_Mutation | SNP | 1    |
| H      | 1 | L. Inf. Frontal Lobe             | THEM6   | 8  | 143808967 | C | G | 277 | 82  | p.A68G  | Missense_Mutation | SNP | 1    |
| I      | 1 | Medial Temp. Lobe (White Matter) | THEM6   | 8  | 143808967 | C | G | 402 | 270 | p.A68G  | Missense_Mutation | SNP | 1    |
| Pre-SG | 1 | Primary Breast                   | TOM1    | 22 | 35719615  | C | T | 8   | 4   | p.P165S | Missense_Mutation | SNP | 0.99 |
| A      | 1 | Hilar LN II                      | TOM1    | 22 | 35719615  | C | T | 30  | 90  | p.P165S | Missense_Mutation | SNP | 1    |
| B      | 1 | Hilar LN                         | TOM1    | 22 | 35719615  | C | T | 89  | 44  | p.P165S | Missense_Mutation | SNP | 0.98 |
| C      | 1 | Inferior Liver                   | TOM1    | 22 | 35719615  | C | T | 77  | 75  | p.P165S | Missense_Mutation | SNP | 0.99 |
| D      | 1 | Inferior Liver II                | TOM1    | 22 | 35719615  | C | T | 46  | 86  | p.P165S | Missense_Mutation | SNP | 1    |
| E      | 1 | Chest Wall Subcutaneous          | TOM1    | 22 | 35719615  | C | T | 158 | 32  | p.P165S | Missense_Mutation | SNP | 1    |
| F      | 1 | RP Peri-aortic LN                | TOM1    | 22 | 35719615  | C | T | 75  | 67  | p.P165S | Missense_Mutation | SNP | 1    |
| G      | 1 | RP Peri-aortic LN II             | TOM1    | 22 | 35719615  | C | T | 37  | 63  | p.P165S | Missense_Mutation | SNP | 1    |
| H      | 1 | L. Inf. Frontal Lobe             | TOM1    | 22 | 35719615  | C | T | 115 | 38  | p.P165S | Missense_Mutation | SNP | 1    |
| I      | 1 | Medial Temp. Lobe (White Matter) | TOM1    | 22 | 35719615  | C | T | 48  | 115 | p.P165S | Missense_Mutation | SNP | 1    |
| Pre-SG | 1 | Primary Breast                   | TP53    | 17 | 7578535   | T | C | 12  | 8   | p.K132R | Missense_Mutation | SNP | 0.99 |
| A      | 1 | Hilar LN II                      | TP53    | 17 | 7578535   | T | C | 46  | 85  | p.K132R | Missense_Mutation | SNP | 1    |
| B      | 1 | Hilar LN                         | TP53    | 17 | 7578535   | T | C | 134 | 76  | p.K132R | Missense_Mutation | SNP | 0.98 |
| C      | 1 | Inferior Liver                   | TP53    | 17 | 7578535   | T | C | 96  | 106 | p.K132R | Missense_Mutation | SNP | 0.99 |
| D      | 1 | Inferior Liver II                | TP53    | 17 | 7578535   | T | C | 93  | 125 | p.K132R | Missense_Mutation | SNP | 1    |
| E      | 1 | Chest Wall Subcutaneous          | TP53    | 17 | 7578535   | T | C | 240 | 52  | p.K132R | Missense_Mutation | SNP | 1    |
| F      | 1 | RP Peri-aortic LN                | TP53    | 17 | 7578535   | T | C | 80  | 88  | p.K132R | Missense_Mutation | SNP | 1    |
| G      | 1 | RP Peri-aortic LN II             | TP53    | 17 | 7578535   | T | C | 68  | 111 | p.K132R | Missense_Mutation | SNP | 1    |
| H      | 1 | L. Inf. Frontal Lobe             | TP53    | 17 | 7578535   | T | C | 165 | 36  | p.K132R | Missense_Mutation | SNP | 1    |
| I      | 1 | Medial Temp. Lobe (White Matter) | TP53    | 17 | 7578535   | T | C | 52  | 153 | p.K132R | Missense_Mutation | SNP | 1    |
| Pre-SG | 1 | Primary Breast                   | TRIM58  | 1  | 248039647 | C | G | 7   | 23  | p.L439L | Silent            | SNP | 0.99 |
| A      | 1 | Hilar LN II                      | TRIM58  | 1  | 248039647 | C | G | 41  | 168 | p.L439L | Silent            | SNP | 1    |
| B      | 1 | Hilar LN                         | TRIM58  | 1  | 248039647 | C | G | 107 | 73  | p.L439L | Silent            | SNP | 0.98 |
| C      | 1 | Inferior Liver                   | TRIM58  | 1  | 248039647 | C | G | 75  | 134 | p.L439L | Silent            | SNP | 0.99 |
| D      | 1 | Inferior Liver II                | TRIM58  | 1  | 248039647 | C | G | 66  | 222 | p.L439L | Silent            | SNP | 1    |
| E      | 1 | Chest Wall Subcutaneous          | TRIM58  | 1  | 248039647 | C | G | 185 | 55  | p.L439L | Silent            | SNP | 1    |
| F      | 1 | RP Peri-aortic LN                | TRIM58  | 1  | 248039647 | C | G | 55  | 83  | p.L439L | Silent            | SNP | 1    |
| G      | 1 | RP Peri-aortic LN II             | TRIM58  | 1  | 248039647 | C | G | 55  | 138 | p.L439L | Silent            | SNP | 1    |
| H      | 1 | L. Inf. Frontal Lobe             | TRIM58  | 1  | 248039647 | C | G | 172 | 68  | p.L439L | Silent            | SNP | 1    |
| I      | 1 | Medial Temp. Lobe (White Matter) | TRIM58  | 1  | 248039647 | C | G | 39  | 159 | p.L439L | Silent            | SNP | 1    |
| Pre-SG | 1 | Primary Breast                   | USP45   | 6  | 99883618  | G | A | 11  | 6   | p.L807F | Missense_Mutation | SNP | 0.99 |
| A      | 1 | Hilar LN II                      | USP45   | 6  | 99883618  | G | A | 101 | 70  | p.L807F | Missense_Mutation | SNP | 1    |
| B      | 1 | Hilar LN                         | USP45   | 6  | 99883618  | G | A | 84  | 47  | p.L807F | Missense_Mutation | SNP | 0.98 |
| C      | 1 | Inferior Liver                   | USP45   | 6  | 99883618  | G | A | 91  | 37  | p.L807F | Missense_Mutation | SNP | 0.99 |
| D      | 1 | Inferior Liver II                | USP45   | 6  | 99883618  | G | A | 116 | 63  | p.L807F | Missense_Mutation | SNP | 1    |
| E      | 1 | Chest Wall Subcutaneous          | USP45   | 6  | 99883618  | G | A | 144 | 21  | p.L807F | Missense_Mutation | SNP | 1    |
| F      | 1 | RP Peri-aortic LN                | USP45   | 6  | 99883618  | G | A | 73  | 45  | p.L807F | Missense_Mutation | SNP | 1    |
| G      | 1 | RP Peri-aortic LN II             | USP45   | 6  | 99883618  | G | A | 96  | 41  | p.L807F | Missense_Mutation | SNP | 1    |
| H      | 1 | L. Inf. Frontal Lobe             | USP45   | 6  | 99883618  | G | A | 165 | 21  | p.L807F | Missense_Mutation | SNP | 1    |
| I      | 1 | Medial Temp. Lobe (White Matter) | USP45   | 6  | 99883618  | G | A | 82  | 55  | p.L807F | Missense_Mutation | SNP | 1    |
| Pre-SG | 1 | Primary Breast                   | ZNF516  | 18 | 74091978  | C | A | 10  | 2   | p.G698* | Nonsense_Mutation | SNP | 0.99 |
| A      | 1 | Hilar LN II                      | ZNF516  | 18 | 74091978  | C | A | 130 | 79  | p.G698* | Nonsense_Mutation | SNP | 1    |
| B      | 1 | Hilar LN                         | ZNF516  | 18 | 74091978  | C | A | 211 | 40  | p.G698* | Nonsense_Mutation | SNP | 0.98 |
| C      | 1 | Inferior Liver                   | ZNF516  | 18 | 74091978  | C | A | 276 | 122 | p.G698* | Nonsense_Mutation | SNP | 0.99 |
| D      | 1 | Inferior Liver II                | ZNF516  | 18 | 74091978  | C | A | 132 | 85  | p.G698* | Nonsense_Mutation | SNP | 1    |
| E      | 1 | Chest Wall Subcutaneous          | ZNF516  | 18 | 74091978  | C | A | 226 | 26  | p.G698* | Nonsense_Mutation | SNP | 1    |
| F      | 1 | RP Peri-aortic LN                | ZNF516  | 18 | 74091978  | C | A | 131 | 152 | p.G698* | Nonsense_Mutation | SNP | 1    |
| G      | 1 | RP Peri-aortic LN II             | ZNF516  | 18 | 74091978  | C | A | 165 | 14  | p.G698* | Nonsense_Mutation | SNP | 1    |
| H      | 1 | L. Inf. Frontal Lobe             | ZNF516  | 18 | 74091978  | C | A | 186 | 32  | p.G698* | Nonsense_Mutation | SNP | 1    |
| I      | 1 | Medial Temp. Lobe (White Matter) | ZNF516  | 18 | 74091978  | C | A | 181 | 127 | p.G698* | Nonsense_Mutation | SNP | 1    |
| Pre-SG | 1 | Primary Breast                   | ZNF850  | 19 | 37238967  | C | A | 8   | 1   | p.C992F | Missense_Mutation | SNP | 0.99 |
| A      | 1 | Hilar LN II                      | ZNF850  | 19 | 37238967  | C | A | 102 | 52  | p.C992F | Missense_Mutation | SNP | 1    |
| B      | 1 | Hilar LN                         | ZNF850  | 19 | 37238967  | C | A | 156 | 42  | p.C992F | Missense_Mutation | SNP | 0.98 |
| C      | 1 | Inferior Liver                   | ZNF850  | 19 | 37238967  | C | A | 106 | 43  | p.C992F | Missense_Mutation | SNP | 0.99 |
| D      | 1 | Inferior Liver II                | ZNF850  | 19 | 37238967  | C | A | 130 | 70  | p.C992F | Missense_Mutation | SNP | 1    |
| E      | 1 | Chest Wall Subcutaneous          | ZNF850  | 19 | 37238967  | C | A | 229 | 22  | p.C992F | Missense_Mutation | SNP | 1    |
| F      | 1 | RP Peri-aortic LN                | ZNF850  | 19 | 37238967  | C | A | 83  | 32  | p.C992F | Missense_Mutation | SNP | 1    |
| G      | 1 | RP Peri-aortic LN II             | ZNF850  | 19 | 37238967  | C | A | 97  | 40  | p.C992F | Missense_Mutation | SNP | 1    |
| H      | 1 | L. Inf. Frontal Lobe             | ZNF850  | 19 | 37238967  | C | A | 163 | 23  | p.C992F | Missense_Mutation | SNP | 1    |



|   |   |                                  |         |    |           |           |   |     |     |             |                   |     |      |
|---|---|----------------------------------|---------|----|-----------|-----------|---|-----|-----|-------------|-------------------|-----|------|
| I | 1 | Medial Temp. Lobe (White Matter) | ZNF850  | 19 | 37238967  | C         | A | 93  | 44  | p.C992F     | Missense_Mutation | SNP | 1    |
| A | 2 | Hilar LN II                      | ALG2    | 9  | 101984002 | A         | G | 191 | 204 | p.COR       | Missense_Mutation | SNP | 0.94 |
| H | 2 | L. Inf. Frontal Lobe             | ALG2    | 9  | 101984002 | A         | G | 290 | 68  | p.COR       | Missense_Mutation | SNP | 0.97 |
| I | 2 | Medial Temp. Lobe (White Matter) | ALG2    | 9  | 101984002 | A         | G | 468 | 262 | p.COR       | Missense_Mutation | SNP | 0.94 |
| A | 2 | Hilar LN II                      | ALS2    | 2  | 202572662 | G         | A | 206 | 110 | p.P1445S    | Missense_Mutation | SNP | 0.94 |
| H | 2 | L. Inf. Frontal Lobe             | ALS2    | 2  | 202572662 | G         | A | 337 | 50  | p.P1445S    | Missense_Mutation | SNP | 0.97 |
| I | 2 | Medial Temp. Lobe (White Matter) | ALS2    | 2  | 202572662 | G         | A | 247 | 126 | p.P1445S    | Missense_Mutation | SNP | 0.94 |
| A | 2 | Hilar LN II                      | BPIFB4  | 20 | 31682929  | C         | T | 140 | 71  | p.T456T     | Silent            | SNP | 0.94 |
| H | 2 | L. Inf. Frontal Lobe             | BPIFB4  | 20 | 31682929  | C         | T | 208 | 29  | p.T456T     | Silent            | SNP | 0.97 |
| I | 2 | Medial Temp. Lobe (White Matter) | BPIFB4  | 20 | 31682929  | C         | T | 207 | 96  | p.T456T     | Silent            | SNP | 0.94 |
| A | 2 | Hilar LN II                      | CASP2   | 7  | 142988742 | G         | C | 203 | 133 | p.E62Q      | Missense_Mutation | SNP | 0.94 |
| H | 2 | L. Inf. Frontal Lobe             | CASP2   | 7  | 142988742 | G         | C | 281 | 71  | p.E62Q      | Missense_Mutation | SNP | 0.97 |
| I | 2 | Medial Temp. Lobe (White Matter) | CASP2   | 7  | 142988742 | G         | C | 232 | 177 | p.E62Q      | Missense_Mutation | SNP | 0.94 |
| A | 2 | Hilar LN II                      | ELAVL2  | 9  | 23762155  | C         | G | 196 | 87  | p.S26S      | Silent            | SNP | 0.94 |
| H | 2 | L. Inf. Frontal Lobe             | ELAVL2  | 9  | 23762155  | C         | G | 262 | 48  | p.S26S      | Silent            | SNP | 0.97 |
| I | 2 | Medial Temp. Lobe (White Matter) | ELAVL2  | 9  | 23762155  | C         | G | 190 | 89  | p.S26S      | Silent            | SNP | 0.94 |
| A | 2 | Hilar LN II                      | FAM129B | 9  | 130293942 | C         | G | 124 | 59  | p.Q57H      | Missense_Mutation | SNP | 0.94 |
| H | 2 | L. Inf. Frontal Lobe             | FAM129B | 9  | 130293942 | C         | G | 115 | 37  | p.Q57H      | Missense_Mutation | SNP | 0.97 |
| I | 2 | Medial Temp. Lobe (White Matter) | FAM129B | 9  | 130293942 | C         | G | 209 | 126 | p.Q57H      | Missense_Mutation | SNP | 0.94 |
| A | 2 | Hilar LN II                      | FAM134A | 2  | 220043327 | A         | C | 37  | 50  | p.T85P      | Missense_Mutation | SNP | 0.94 |
| H | 2 | L. Inf. Frontal Lobe             | FAM134A | 2  | 220043327 | A         | C | 99  | 34  | p.T85P      | Missense_Mutation | SNP | 0.97 |
| I | 2 | Medial Temp. Lobe (White Matter) | FAM134A | 2  | 220043327 | A         | C | 69  | 116 | p.T85P      | Missense_Mutation | SNP | 0.94 |
| A | 2 | Hilar LN II                      | HLA-DMA | 6  | 32917414  | T         | C | 81  | 64  | p.D209G     | Missense_Mutation | SNP | 0.94 |
| H | 2 | L. Inf. Frontal Lobe             | HLA-DMA | 6  | 32917414  | T         | C | 124 | 25  | p.D209G     | Missense_Mutation | SNP | 0.97 |
| I | 2 | Medial Temp. Lobe (White Matter) | HLA-DMA | 6  | 32917414  | T         | C | 113 | 90  | p.D209G     | Missense_Mutation | SNP | 0.94 |
| A | 2 | Hilar LN II                      | LAMC2   | 1  | 183203509 | C         | T | 435 | 141 | p.P743L     | Missense_Mutation | SNP | 0.94 |
| H | 2 | L. Inf. Frontal Lobe             | LAMC2   | 1  | 183203509 | C         | T | 558 | 71  | p.P743L     | Missense_Mutation | SNP | 0.97 |
| I | 2 | Medial Temp. Lobe (White Matter) | LAMC2   | 1  | 183203509 | C         | T | 713 | 239 | p.P743L     | Missense_Mutation | SNP | 0.94 |
| A | 2 | Hilar LN II                      | MYH1    | 17 | 10409143  | T         | C | 33  | 63  | p.A720A     | Silent            | SNP | 0.94 |
| H | 2 | L. Inf. Frontal Lobe             | MYH1    | 17 | 10409143  | T         | C | 111 | 14  | p.A720A     | Silent            | SNP | 0.97 |
| I | 2 | Medial Temp. Lobe (White Matter) | MYH1    | 17 | 10409143  | T         | C | 17  | 64  | p.A720A     | Silent            | SNP | 0.94 |
| A | 2 | Hilar LN II                      | NCS1    | 9  | 132980144 | G         | T | 383 | 187 | p.G41G      | Silent            | SNP | 0.94 |
| H | 2 | L. Inf. Frontal Lobe             | NCS1    | 9  | 132980144 | G         | T | 464 | 97  | p.G41G      | Silent            | SNP | 0.97 |
| I | 2 | Medial Temp. Lobe (White Matter) | NCS1    | 9  | 132980144 | G         | T | 451 | 330 | p.G41G      | Silent            | SNP | 0.94 |
| A | 2 | Hilar LN II                      | PCNXL3  | 11 | 65384367  | A         | T | 118 | 67  | p.T76S      | Missense_Mutation | SNP | 0.94 |
| H | 2 | L. Inf. Frontal Lobe             | PCNXL3  | 11 | 65384367  | A         | T | 156 | 39  | p.T76S      | Missense_Mutation | SNP | 0.97 |
| I | 2 | Medial Temp. Lobe (White Matter) | PCNXL3  | 11 | 65384367  | A         | T | 227 | 141 | p.T76S      | Missense_Mutation | SNP | 0.94 |
| A | 2 | Hilar LN II                      | PIWL2   | 8  | 22167467  | T         | C | 22  | 13  | NA          | Intron            | SNP | 0.94 |
| H | 2 | L. Inf. Frontal Lobe             | PIWL2   | 8  | 22167467  | T         | C | 20  | 7   | NA          | Intron            | SNP | 0.97 |
| I | 2 | Medial Temp. Lobe (White Matter) | PIWL2   | 8  | 22167467  | T         | C | 24  | 11  | NA          | Intron            | SNP | 0.94 |
| A | 2 | Hilar LN II                      | PSMA2   | 7  | 42964365  | GAGCTAGT- |   | 69  | 25  | p.RKLA91del | In_Frame_Del      | DEL | 0.94 |
| H | 2 | L. Inf. Frontal Lobe             | PSMA2   | 7  | 42964365  | GAGCTAGT- |   | 104 | 6   | p.RKLA91del | In_Frame_Del      | DEL | 0.97 |
| I | 2 | Medial Temp. Lobe (White Matter) | PSMA2   | 7  | 42964365  | GAGCTAGT- |   | 39  | 18  | p.RKLA91del | In_Frame_Del      | DEL | 0.94 |
| A | 2 | Hilar LN II                      | SCAND3  | 6  | 28540825  | A         | G | 89  | 69  | p.Y947Y     | Silent            | SNP | 0.94 |
| H | 2 | L. Inf. Frontal Lobe             | SCAND3  | 6  | 28540825  | A         | G | 139 | 33  | p.Y947Y     | Silent            | SNP | 0.97 |
| I | 2 | Medial Temp. Lobe (White Matter) | SCAND3  | 6  | 28540825  | A         | G | 95  | 49  | p.Y947Y     | Silent            | SNP | 0.94 |
| A | 2 | Hilar LN II                      | SLC37A2 | 11 | 124949116 | C         | - | 62  | 127 | p.H141fs    | Frame_Shift_Del   | DEL | 0.94 |
| H | 2 | L. Inf. Frontal Lobe             | SLC37A2 | 11 | 124949116 | C         | - | 168 | 58  | p.H141fs    | Frame_Shift_Del   | DEL | 0.97 |
| I | 2 | Medial Temp. Lobe (White Matter) | SLC37A2 | 11 | 124949116 | C         | - | 104 | 185 | p.H141fs    | Frame_Shift_Del   | DEL | 0.94 |
| A | 2 | Hilar LN II                      | SYBU    | 8  | 110588171 | T         | A | 130 | 61  | p.H319L     | Missense_Mutation | SNP | 0.94 |
| H | 2 | L. Inf. Frontal Lobe             | SYBU    | 8  | 110588171 | T         | A | 153 | 39  | p.H319L     | Missense_Mutation | SNP | 0.97 |
| I | 2 | Medial Temp. Lobe (White Matter) | SYBU    | 8  | 110588171 | T         | A | 169 | 147 | p.H319L     | Missense_Mutation | SNP | 0.94 |
| A | 2 | Hilar LN II                      | UNC80   | 2  | 210782663 | G         | A | 19  | 45  | p.G1665E    | Missense_Mutation | SNP | 0.94 |
| H | 2 | L. Inf. Frontal Lobe             | UNC80   | 2  | 210782663 | G         | A | 96  | 22  | p.G1665E    | Missense_Mutation | SNP | 0.97 |
| I | 2 | Medial Temp. Lobe (White Matter) | UNC80   | 2  | 210782663 | G         | A | 16  | 36  | p.G1665E    | Missense_Mutation | SNP | 0.94 |
| A | 2 | Hilar LN II                      | ZNF354A | 5  | 178139868 | G         | T | 314 | 79  | p.C337*     | Nonsense_Mutation | SNP | 0.94 |
| H | 2 | L. Inf. Frontal Lobe             | ZNF354A | 5  | 178139868 | G         | T | 206 | 32  | p.C337*     | Nonsense_Mutation | SNP | 0.97 |
| I | 2 | Medial Temp. Lobe (White Matter) | ZNF354A | 5  | 178139868 | G         | T | 167 | 50  | p.C337*     | Nonsense_Mutation | SNP | 0.94 |
| C | 3 | Inferior Liver                   | ACSM2B  | 16 | 20563560  | A         | T | 48  | 21  | p.L267Q     | Missense_Mutation | SNP | 0.98 |
| F | 3 | RP Peri-aortic LN                | ACSM2B  | 16 | 20563560  | A         | T | 50  | 14  | p.L267Q     | Missense_Mutation | SNP | 0.97 |
| C | 3 | Inferior Liver                   | BLK     | 8  | 11418764  | G         | C | 59  | 66  | NA          | Intron            | SNP | 0.98 |
| F | 3 | RP Peri-aortic LN                | BLK     | 8  | 11418764  | G         | C | 48  | 54  | NA          | Intron            | SNP | 0.97 |
| C | 3 | Inferior Liver                   | C9orf40 | 9  | 77567455  | C         | T | 176 | 106 | p.A25T      | Missense_Mutation | SNP | 0.98 |
| F | 3 | RP Peri-aortic LN                | C9orf40 | 9  | 77567455  | C         | T | 234 | 123 | p.A25T      | Missense_Mutation | SNP | 0.97 |
| C | 3 | Inferior Liver                   | CAMSAP3 | 19 | 7676431   | C         | G | 69  | 25  | p.S384S     | Silent            | SNP | 0.98 |
| F | 3 | RP Peri-aortic LN                | CAMSAP3 | 19 | 7676431   | C         | G | 68  | 18  | p.S384S     | Silent            | SNP | 0.97 |
| C | 3 | Inferior Liver                   | CENPA   | 2  | 27016123  | G         | A | 108 | 88  | p.R133R     | Silent            | SNP | 0.98 |
| F | 3 | RP Peri-aortic LN                | CENPA   | 2  | 27016123  | G         | A | 141 | 64  | p.R133R     | Silent            | SNP | 0.97 |
| C | 3 | Inferior Liver                   | CIB3    | 19 | 16279043  | C         | A | 152 | 71  | p.G84V      | Missense_Mutation | SNP | 0.98 |
| F | 3 | RP Peri-aortic LN                | CIB3    | 19 | 16279043  | C         | A | 136 | 56  | p.G84V      | Missense_Mutation | SNP | 0.97 |
| C | 3 | Inferior Liver                   | CLMN    | 14 | 95670292  | G         | C | 32  | 45  | p.A465G     | Missense_Mutation | SNP | 0.98 |
| F | 3 | RP Peri-aortic LN                | CLMN    | 14 | 95670292  | G         | C | 36  | 33  | p.A465G     | Missense_Mutation | SNP | 0.97 |
| C | 3 | Inferior Liver                   | CRTC3   | 15 | 91172702  | C         | A | 113 | 122 | p.H402N     | Missense_Mutation | SNP | 0.98 |
| F | 3 | RP Peri-aortic LN                | CRTC3   | 15 | 91172702  | C         | A | 121 | 118 | p.H402N     | Missense_Mutation | SNP | 0.97 |
| C | 3 | Inferior Liver                   | CSHL1   | 17 | 61987824  | A         | C | 133 | 156 | p.S88A      | Missense_Mutation | SNP | 0.98 |
| F | 3 | RP Peri-aortic LN                | CSHL1   | 17 | 61987824  | A         | C | 144 | 126 | p.S88A      | Missense_Mutation | SNP | 0.97 |
| C | 3 | Inferior Liver                   | DENND1C | 19 | 6466685   | C         | T | 158 | 94  | NA          | IGR               | SNP | 0.98 |
| F | 3 | RP Peri-aortic LN                | DENND1C | 19 | 6466685   | C         | T | 143 | 70  | NA          | IGR               | SNP | 0.97 |
| C | 3 | Inferior Liver                   | FLG2    | 1  | 152325317 | G         | C | 423 | 161 | p.Q1649E    | Missense_Mutation | SNP | 0.98 |
| F | 3 | RP Peri-aortic LN                | FLG2    | 1  | 152325317 | G         | C | 309 | 63  | p.Q1649E    | Missense_Mutation | SNP | 0.97 |
| C | 3 | Inferior Liver                   | GMEB2   | 20 | 62250662  | C         | T | 122 | 56  | p.G30E      | Missense_Mutation | SNP | 0.98 |
| F | 3 | RP Peri-aortic LN                | GMEB2   | 20 | 62250662  | C         | T | 112 | 54  | p.G30E      | Missense_Mutation | SNP | 0.97 |
| C | 3 | Inferior Liver                   | GRIK2   | 6  | 102247643 | C         | T | 121 | 67  | p.R358C     | Missense_Mutation | SNP | 0.98 |
| F | 3 | RP Peri-aortic LN                | GRIK2   | 6  | 102247643 | C         | T | 103 | 55  | p.R358C     | Missense_Mutation | SNP | 0.97 |
| C | 3 | Inferior Liver                   | HNRNPA1 | 12 | 54675246  | G         | A | 136 | 60  | p.R31K      | Missense_Mutation | SNP | 0.98 |
| F | 3 | RP Peri-aortic LN                | HNRNPA1 | 12 | 54675246  | G         | A | 114 | 67  | p.R31K      | Missense_Mutation | SNP | 0.97 |
| C | 3 | Inferior Liver                   | LAMA1   | 18 | 7034475   | T         | C | 173 | 79  | NA          | Intron            | SNP | 0.98 |
| F | 3 | RP Peri-aortic LN                | LAMA1   | 18 | 7034475   | T         | C | 116 | 58  | NA          | Intron            | SNP | 0.97 |
| C | 3 | Inferior Liver                   | MAFA    | 8  | 144511711 | A         | T | 278 | 237 | NA          | 5'UTR             | SNP | 0.98 |
| F | 3 | RP Peri-aortic LN                | MAFA    | 8  | 144511711 | A         | T | 365 | 223 | NA          | 5'UTR             | SNP | 0.97 |
| C | 3 | Inferior Liver                   | MAS1L   | 6  | 29455475  | C         | T | 116 | 73  | p.G69R      | Missense_Mutation | SNP | 0.98 |
| F | 3 | RP Peri-aortic LN                | MAS1L   | 6  | 29455475  | C         | T | 128 | 62  | p.G69R      | Missense_Mutation | SNP | 0.97 |
| C | 3 | Inferior Liver                   | MRPL47  | 3  | 179322378 | C         | G | 130 | 57  | p.R12T      | Missense_Mutation | SNP | 0.98 |
| F | 3 | RP Peri-aortic LN                | MRPL47  | 3  | 179322378 | C         | G | 100 | 32  | p.R12T      | Missense_Mutation | SNP | 0.97 |
| C | 3 | Inferior Liver                   | MSC     | 8  | 72756185  | C         | A | 183 | 81  | p.V77L      | Missense_Mutation | SNP | 0.98 |
| F | 3 | RP Peri-aortic LN                | MSC     | 8  | 72756185  | C         | A | 167 | 79  | p.V77L      | Missense_Mutation | SNP | 0.97 |
| C | 3 | Inferior Liver                   | MUC22   | 6  | 30996075  | A         | G | 178 | 94  | p.K956R     | Missense_Mutation | SNP | 0.98 |
| F | 3 | RP Peri-aortic LN                | MUC22   | 6  | 30996075  | A         | G | 177 | 91  | p.K956R     | Missense_Mutation | SNP | 0.97 |
| C | 3 | RP Peri-aortic LN II             | MUC22   | 6  | 30996075  | A         | G | 285 | 3   | p.K956R     | Missense_Mutation | SNP | 0.01 |
| G | 3 | Inferior Liver                   | NCAPD2  | 12 | 6619438   | C         | G | 102 | 70  | NA          | Intron            | SNP | 0.98 |
| F | 3 | RP Peri-aortic LN                | NCAPD2  | 12 | 6619438   | C         | G | 75  | 39  | NA          | Intron            | SNP | 0.97 |
| C | 3 | Inferior Liver                   | NKPD1   | 19 | 45655697  | G         | C | 76  | 75  | p.R444R     | Silent            | SNP | 0.98 |
| F | 3 | RP Peri-aortic LN                | NKPD1   | 19 | 45655697  | G         | C | 97  | 101 | p.R444R     | Silent            | SNP | 0.97 |
| C | 3 | Inferior Liver                   | NOL6    | 9  | 33462156  | A         | T | 141 | 25  | NA          | 3'UTR             | SNP | 0.98 |
| F | 3 | RP Peri-aortic LN                | NOL6    | 9  | 33462156  | A         | T | 120 | 56  | NA          | 3'UTR             | SNP | 0.97 |
| C | 3 | Inferior Liver                   | NOTCH1  | 9  | 139418481 | C         | - | 115 | 22  | NA          | Intron            | DEL | 0.98 |

|   |   |                         |              |          |           |        |     |     |         |            |                   |      |      |
|---|---|-------------------------|--------------|----------|-----------|--------|-----|-----|---------|------------|-------------------|------|------|
| F | 3 | RP Peri-aortic LN       | NOTCH1       | 9        | 139418481 | C      | -   | 126 | 55      | NA         | Intron            | DEL  | 0.97 |
| C | 3 | Inferior Liver          | NRIP2        | 12       | 2943868   | C      | G   | 169 | 49      | p.K94N     | Missense_Mutation | SNP  | 0.98 |
| F | 3 | RP Peri-aortic LN       | NRIP2        | 12       | 2943868   | C      | G   | 139 | 71      | p.K94N     | Missense_Mutation | SNP  | 0.97 |
| C | 3 | Inferior Liver          | OCSTAMP      | 20       | 45170362  | G      | C   | 140 | 66      | p.L418V    | Missense_Mutation | SNP  | 0.98 |
| F | 3 | RP Peri-aortic LN       | OCSTAMP      | 20       | 45170362  | G      | C   | 131 | 89      | p.L418V    | Missense_Mutation | SNP  | 0.97 |
| C | 3 | Inferior Liver          | OR9Q2        | 11       | 57958417  | G      | T   | 257 | 51      | p.G152V    | Missense_Mutation | SNP  | 0.98 |
| F | 3 | RP Peri-aortic LN       | OR9Q2        | 11       | 57958417  | G      | T   | 207 | 90      | p.G152V    | Missense_Mutation | SNP  | 0.97 |
| G | 3 | RP Peri-aortic LN II    | OR9Q2        | 11       | 57958417  | G      | T   | 299 | 3       | p.G152V    | Missense_Mutation | SNP  | 0.01 |
| C | 3 | Inferior Liver          | OSMR         | 5        | 38925442  | G      | C   | 93  | 79      | p.T727T    | Silent            | SNP  | 0.98 |
| F | 3 | RP Peri-aortic LN       | OSMR         | 5        | 38925442  | G      | C   | 101 | 59      | p.T727T    | Silent            | SNP  | 0.97 |
| C | 3 | Inferior Liver          | PNLIP        | 10       | 118313297 | A      | C   | 183 | 101     | p.H173P    | Missense_Mutation | SNP  | 0.98 |
| F | 3 | RP Peri-aortic LN       | PNLIP        | 10       | 118313297 | A      | C   | 181 | 85      | p.H173P    | Missense_Mutation | SNP  | 0.97 |
| C | 3 | Inferior Liver          | PRM3         | 16       | 11369842  | G      | A   | 213 | 108     | NA         | 5'Flank           | SNP  | 0.98 |
| F | 3 | RP Peri-aortic LN       | PRM3         | 16       | 11369842  | G      | A   | 252 | 57      | NA         | 5'Flank           | SNP  | 0.97 |
| B | 3 | Hilar LN                | SIX3         | 2        | 45171832  | C      | T   | 415 | 3       | p.T311M    | Missense_Mutation | SNP  | 0.01 |
| C | 3 | Inferior Liver          | SIX3         | 2        | 45171832  | C      | T   | 214 | 120     | p.T311M    | Missense_Mutation | SNP  | 0.98 |
| F | 3 | RP Peri-aortic LN       | SIX3         | 2        | 45171832  | C      | T   | 294 | 104     | p.T311M    | Missense_Mutation | SNP  | 0.97 |
| C | 3 | Inferior Liver          | SLC16A11     | 17       | 6946749   | G      | A   | 101 | 84      | p.S52S     | Silent            | SNP  | 0.98 |
| F | 3 | RP Peri-aortic LN       | SLC16A11     | 17       | 6946749   | G      | A   | 102 | 90      | p.S52S     | Silent            | SNP  | 0.97 |
| C | 3 | Inferior Liver          | SLC44A2      | 19       | 10736961  | G      | A   | 165 | 55      | p.G24R     | Missense_Mutation | SNP  | 0.98 |
| F | 3 | RP Peri-aortic LN       | SLC44A2      | 19       | 10736961  | G      | A   | 119 | 64      | p.G24R     | Missense_Mutation | SNP  | 0.97 |
| B | 3 | Hilar LN                | TBXAS1       | 7        | 139636041 | G      | A   | 580 | 3       | p.D129N    | Missense_Mutation | SNP  | 0.01 |
| C | 3 | Inferior Liver          | TBXAS1       | 7        | 139636041 | G      | A   | 309 | 146     | p.D129N    | Missense_Mutation | SNP  | 0.98 |
| F | 3 | RP Peri-aortic LN       | TBXAS1       | 7        | 139636041 | G      | A   | 364 | 138     | p.D129N    | Missense_Mutation | SNP  | 0.97 |
| C | 3 | Inferior Liver          | TLE3         | 15       | 70350514  | C      | A   | 86  | 89      | p.P345P    | Silent            | SNP  | 0.98 |
| F | 3 | RP Peri-aortic LN       | TLE3         | 15       | 70350514  | C      | A   | 77  | 62      | p.P345P    | Silent            | SNP  | 0.97 |
| C | 3 | Inferior Liver          | TOP1         | 20       | 39729937  | G      | A   | 88  | 49      | p.E418K    | Missense_Mutation | SNP  | 0.98 |
| F | 3 | RP Peri-aortic LN       | TOP1         | 20       | 39729937  | G      | A   | 79  | 30      | p.E418K    | Missense_Mutation | SNP  | 0.97 |
| C | 3 | Inferior Liver          | TRIM22       | 11       | 5730733   | C      | A   | 136 | 58      | p.A451E    | Missense_Mutation | SNP  | 0.98 |
| F | 3 | RP Peri-aortic LN       | TRIM22       | 11       | 5730733   | C      | A   | 130 | 30      | p.A451E    | Missense_Mutation | SNP  | 0.97 |
| C | 3 | Inferior Liver          | Unknown      | 18       | 53331995  | C      | T   | 197 | 64      | NA         | IGR               | SNP  | 0.98 |
| F | 3 | RP Peri-aortic LN       | Unknown      | 18       | 53331995  | C      | T   | 120 | 53      | NA         | IGR               | SNP  | 0.97 |
| C | 3 | Inferior Liver          | Y_RNA        | 7        | 74310231  | A      | C   | 129 | 25      | NA         | RNA               | SNP  | 0.98 |
| F | 3 | RP Peri-aortic LN       | Y_RNA        | 7        | 74310231  | A      | C   | 103 | 59      | NA         | RNA               | SNP  | 0.97 |
| C | 3 | Inferior Liver          | ZNF234       | 19       | 44661443  | A      | C   | 40  | 59      | p.E425A    | Missense_Mutation | SNP  | 0.98 |
| F | 3 | RP Peri-aortic LN       | ZNF234       | 19       | 44661443  | A      | C   | 39  | 37      | p.E425A    | Missense_Mutation | SNP  | 0.97 |
| C | 3 | Inferior Liver          | ZNF276       | 16       | 89805562  | C      | T   | 87  | 81      | NA         | IGR               | SNP  | 0.98 |
| F | 3 | RP Peri-aortic LN       | ZNF276       | 16       | 89805562  | C      | T   | 51  | 51      | NA         | IGR               | SNP  | 0.97 |
| D | 4 | Inferior Liver II       | CACNA1A      | 19       | 13318816  | T      | C   | 26  | 7       | p.T2279A   | Missense_Mutation | SNP  | 0.73 |
| G | 4 | RP Peri-aortic LN II    | CACNA1A      | 19       | 13318816  | T      | C   | 15  | 7       | p.T2279A   | Missense_Mutation | SNP  | 0.98 |
| D | 4 | Inferior Liver II       | DOCK1        | 10       | 129213495 | T      | G   | 81  | 58      | p.V1482G   | Missense_Mutation | SNP  | 0.73 |
| G | 4 | RP Peri-aortic LN II    | DOCK1        | 10       | 129213495 | T      | G   | 33  | 86      | p.V1482G   | Missense_Mutation | SNP  | 0.98 |
| D | 4 | Inferior Liver II       | ETV6         | 12       | 11992224  | G      | A   | 78  | 0       | p.R105Q    | Missense_Mutation | SNP  | 0.73 |
| G | 4 | RP Peri-aortic LN II    | ETV6         | 12       | 11992224  | G      | A   | 49  | 27      | p.R105Q    | Missense_Mutation | SNP  | 0.98 |
| D | 4 | Inferior Liver II       | TPTE2        | 13       | 20056624  | T      | G   | 102 | 59      | NA         | Intron            | SNP  | 0.73 |
| G | 4 | RP Peri-aortic LN II    | TPTE2        | 13       | 20056624  | T      | G   | 70  | 47      | NA         | Intron            | SNP  | 0.98 |
| D | 4 | Inferior Liver II       | TPTE2        | 13       | 20056691  | T      | C   | 114 | 68      | NA         | Intron            | SNP  | 0.73 |
| G | 4 | RP Peri-aortic LN II    | TPTE2        | 13       | 20056691  | T      | C   | 77  | 32      | NA         | Intron            | SNP  | 0.98 |
| B | 5 | Hilar LN                | ANKEF1       | 20       | 10026233  | T      | G   | 106 | 19      | p.L236L    | Silent            | SNP  | 0.53 |
| E | 5 | Chest Wall Subcutaneous | ANKEF1       | 20       | 10026233  | T      | G   | 137 | 14      | p.L236L    | Silent            | SNP  | 0.65 |
| B | 5 | Hilar LN                | BCL9         | 1        | 147092477 | G      | T   | 273 | 51      | p.R839L    | Missense_Mutation | SNP  | 0.53 |
| E | 5 | Chest Wall Subcutaneous | BCL9         | 1        | 147092477 | G      | T   | 296 | 48      | p.R839L    | Missense_Mutation | SNP  | 0.65 |
| B | 5 | Hilar LN                | COL11A2      | 6        | 33135045  | G      | A   | 446 | 0       | p.P1391L   | Missense_Mutation | SNP  | 0.53 |
| E | 5 | Chest Wall Subcutaneous | COL11A2      | 6        | 33135045  | G      | A   | 467 | 16      | p.P1391L   | Missense_Mutation | SNP  | 0.65 |
| B | 5 | Hilar LN                | CTIF         | 18       | 46385890  | C      | T   | 351 | 0       | p.T586M    | Missense_Mutation | SNP  | 0.53 |
| E | 5 | Chest Wall Subcutaneous | CTIF         | 18       | 46385890  | C      | T   | 358 | 14      | p.T586M    | Missense_Mutation | SNP  | 0.65 |
| B | 5 | Hilar LN                | DCLRE1C      | 10       | 14951064  | G      | C   | 84  | 24      | p.G474G    | Silent            | SNP  | 0.53 |
| E | 5 | Chest Wall Subcutaneous | DCLRE1C      | 10       | 14951064  | G      | C   | 129 | 13      | p.G474G    | Silent            | SNP  | 0.65 |
| B | 5 | Hilar LN                | FBLN7        | 2        | 112942856 | G      | A   | 188 | 28      | p.C296Y    | Missense_Mutation | SNP  | 0.53 |
| E | 5 | Chest Wall Subcutaneous | FBLN7        | 2        | 112942856 | G      | A   | 266 | 25      | p.C296Y    | Missense_Mutation | SNP  | 0.65 |
| B | 5 | Hilar LN                | FRK          | 6        | 116288804 | G      | C   | 117 | 26      | p.L237V    | Missense_Mutation | SNP  | 0.53 |
| E | 5 | Chest Wall Subcutaneous | FRK          | 6        | 116288804 | G      | C   | 149 | 11      | p.L237V    | Missense_Mutation | SNP  | 0.65 |
| B | 5 | Hilar LN                | HDAC7        | 12       | 48183601  | G      | C   | 183 | 52      | p.L657V    | Missense_Mutation | SNP  | 0.53 |
| E | 5 | Chest Wall Subcutaneous | HDAC7        | 12       | 48183601  | G      | C   | 208 | 10      | p.L657V    | Missense_Mutation | SNP  | 0.65 |
| B | 5 | Hilar LN                | HECTD4       | 12       | 112623196 | G      | A   | 120 | 17      | p.R2770W   | Missense_Mutation | SNP  | 0.53 |
| E | 5 | Chest Wall Subcutaneous | HECTD4       | 12       | 112623196 | G      | A   | 108 | 10      | p.R2770W   | Missense_Mutation | SNP  | 0.65 |
| B | 5 | Hilar LN                | HGSNAT       | 8        | 43047522  | C      | G   | 120 | 0       | p.I470M    | Missense_Mutation | SNP  | 0.53 |
| E | 5 | Chest Wall Subcutaneous | HGSNAT       | 8        | 43047522  | C      | G   | 145 | 6       | p.I470M    | Missense_Mutation | SNP  | 0.65 |
| B | 5 | Hilar LN                | IMPG2        | 3        | 100962864 | G      | C   | 280 | 117     | p.Q771E    | Missense_Mutation | SNP  | 0.53 |
| E | 5 | Chest Wall Subcutaneous | IMPG2        | 3        | 100962864 | G      | C   | 432 | 80      | p.Q771E    | Missense_Mutation | SNP  | 0.65 |
| B | 5 | Hilar LN                | KCNA5        | 12       | 5153802   | C      | G   | 259 | 54      | p.Y163*    | Nonsense_Mutation | SNP  | 0.53 |
| E | 5 | Chest Wall Subcutaneous | KCNA5        | 12       | 5153802   | C      | G   | 327 | 27      | p.Y163*    | Nonsense_Mutation | SNP  | 0.65 |
| B | 5 | Hilar LN                | KIAA0319     | 6        | 24583885  | A      | G   | 143 | 68      | p.L347S    | Missense_Mutation | SNP  | 0.53 |
| E | 5 | Chest Wall Subcutaneous | KIAA0319     | 6        | 24583885  | A      | G   | 263 | 21      | p.L347S    | Missense_Mutation | SNP  | 0.65 |
| B | 5 | Hilar LN                | LAMA4        | 6        | 112493956 | G      | C   | 278 | 53      | p.L470V    | Missense_Mutation | SNP  | 0.53 |
| E | 5 | Chest Wall Subcutaneous | LAMA4        | 6        | 112493956 | G      | C   | 370 | 29      | p.L470V    | Missense_Mutation | SNP  | 0.65 |
| B | 5 | Hilar LN                | LRRIQ3       | 1        | 74507397  | C      | T   | 64  | 6       | p.E406E    | Silent            | SNP  | 0.53 |
| E | 5 | Chest Wall Subcutaneous | LRRIQ3       | 1        | 74507397  | C      | T   | 78  | 5       | p.E406E    | Silent            | SNP  | 0.65 |
| B | 5 | Hilar LN                | PCDP1        | 2        | 120395874 | A      | G   | 215 | 0       | p.T672A    | Missense_Mutation | SNP  | 0.53 |
| E | 5 | Chest Wall Subcutaneous | PCDP1        | 2        | 120395874 | A      | G   | 218 | 11      | p.T672A    | Missense_Mutation | SNP  | 0.65 |
| B | 5 | Hilar LN                | PKP3         | 11       | 394358    | G      | A   | 214 | 53      | p.L22L     | Silent            | SNP  | 0.53 |
| E | 5 | Chest Wall Subcutaneous | PKP3         | 11       | 394358    | G      | A   | 309 | 34      | p.L22L     | Silent            | SNP  | 0.65 |
| B | 5 | Hilar LN                | QPRT         | 16       | 29706083  | G      | G   | 93  | 13      | NA         | Intron            | DEL  | 0.53 |
| E | 5 | Chest Wall Subcutaneous | QPRT         | 16       | 29706083  | G      | G   | 115 | 4       | NA         | Intron            | DEL  | 0.65 |
| B | 5 | Hilar LN                | STX16-NPEF20 | 57243162 | A         | C      | 183 | 38  | p.I124I | Silent     | SNP               | 0.53 |      |
| E | 5 | Chest Wall Subcutaneous | STX16-NPEF20 | 57243162 | A         | C      | 180 | 14  | p.I124I | Silent     | SNP               | 0.65 |      |
| B | 5 | Hilar LN                | TACSTD2      | 1        | 59042062  | G      | C   | 362 | 155     | p.T256R    | Missense_Mutation | SNP  | 0.53 |
| E | 5 | Chest Wall Subcutaneous | TACSTD2      | 1        | 59042062  | G      | C   | 429 | 76      | p.T256R    | Missense_Mutation | SNP  | 0.65 |
| B | 5 | Hilar LN                | TOX          | 8        | 60031460  | G      | A   | 335 | 0       | p.P29P     | Silent            | SNP  | 0.53 |
| E | 5 | Chest Wall Subcutaneous | TOX          | 8        | 60031460  | G      | A   | 349 | 12      | p.P29P     | Silent            | SNP  | 0.65 |
| B | 5 | Hilar LN                | TTL9         | 20       | 30510802  | C      | A   | 168 | 28      | p.P204T    | Missense_Mutation | SNP  | 0.53 |
| E | 5 | Chest Wall Subcutaneous | TTL9         | 20       | 30510802  | C      | A   | 225 | 5       | p.P204T    | Missense_Mutation | SNP  | 0.65 |
| B | 5 | Hilar LN                | UGGT2        | 13       | 96519607  | T      | C   | 40  | 12      | p.I1182V   | Missense_Mutation | SNP  | 0.53 |
| E | 5 | Chest Wall Subcutaneous | UGGT2        | 13       | 96519607  | T      | C   | 99  | 6       | p.I1182V   | Missense_Mutation | SNP  | 0.65 |
| B | 5 | Hilar LN                | Unknown      | 10       | 23580066  | C      | A   | 40  | 4       | NA         | IGR               | SNP  | 0.53 |
| E | 5 | Chest Wall Subcutaneous | Unknown      | 10       | 23580066  | C      | A   | 58  | 2       | NA         | IGR               | SNP  | 0.65 |
| B | 5 | Hilar LN                | USP31        | 16       | 23116813  | G      | C   | 113 | 33      | p.V0V      | Silent            | SNP  | 0.53 |
| E | 5 | Chest Wall Subcutaneous | USP31        | 16       | 23116813  | G      | C   | 179 | 0       | p.V0V      | Silent            | SNP  | 0.65 |
| B | 5 | Hilar LN                | ZNF345       | 19       | 37368394  | G      | C   | 125 | 12      | p.R221P    | Missense_Mutation | SNP  | 0.53 |
| E | 5 | Chest Wall Subcutaneous | ZNF345       | 19       | 37368394  | G      | C   | 147 | 14      | p.R221P    | Missense_Mutation | SNP  | 0.65 |
| B | 5 | Hilar LN                | ZNF714       | 19       | 21299713  | G      | C   | 111 | 18      | p.E81D     | Missense_Mutation | SNP  | 0.53 |
| E | 5 | Chest Wall Subcutaneous | ZNF714       | 19       | 21299713  | G      | C   | 146 | 10      | p.E81D     | Missense_Mutation | SNP  | 0.65 |
| B | 5 | Hilar LN                | ZRANB3       | 2        | 135982022 | TATTCC | -   | 74  | 14      | p.RN740del | In_Frame_Del      | DEL  | 0.53 |
| E | 5 | Chest Wall Subcutaneous | ZRANB3       | 2        | 135982022 | TATTCC | -   | 104 | 5       | p.RN740del | In_Frame_Del      | DEL  | 0.65 |
| H | 6 | L. Inf. Frontal Lobe    | ACTG1        | 17       | 79479308  | C      | T   | 392 | 128     | p.D25N     | Missense_Mutation | SNP  | 0.82 |
| H | 6 | L. Inf. Frontal Lobe    | BCAR3        | 1        | 94054751  | G      | A   | 369 | 42      | p.R238C    | Missense_Mutation | SNP  | 0.82 |

|   |   |                                  |            |    |           |        |   |     |     |            |                   |     |      |
|---|---|----------------------------------|------------|----|-----------|--------|---|-----|-----|------------|-------------------|-----|------|
| H | 6 | L. Inf. Frontal Lobe             | CDH20      | 18 | 59166598  | C      | G | 204 | 37  | p.G142G    | Silent            | SNP | 0.82 |
| H | 6 | L. Inf. Frontal Lobe             | DDX59      | 1  | 200617640 | C      | A | 174 | 16  | p.G508V    | Missense_Mutation | SNP | 0.82 |
| H | 6 | L. Inf. Frontal Lobe             | DDX59      | 1  | 200617641 | C      | A | 170 | 15  | p.G508C    | Missense_Mutation | SNP | 0.82 |
| H | 6 | L. Inf. Frontal Lobe             | DUS3L      | 19 | 5789536   | C      | T | 343 | 63  | p.E194E    | Silent            | SNP | 0.82 |
| H | 6 | L. Inf. Frontal Lobe             | ELFN1      | 7  | 1785890   | C      | G | 248 | 33  | p.A553G    | Missense_Mutation | SNP | 0.82 |
| H | 6 | L. Inf. Frontal Lobe             | FBXL20     | 17 | 37439018  | C      | T | 233 | 56  | p.G195G    | Silent            | SNP | 0.82 |
| H | 6 | L. Inf. Frontal Lobe             | FRZB       | 2  | 183703196 | A      | G | 196 | 49  | p.P246P    | Silent            | SNP | 0.82 |
| H | 6 | L. Inf. Frontal Lobe             | GFPT2      | 5  | 179779380 | C      | T | 314 | 42  | NA         | Intron            | SNP | 0.82 |
| H | 6 | L. Inf. Frontal Lobe             | GRM5       | 11 | 88242139  | G      | A | 278 | 79  | p.P1087L   | Missense_Mutation | SNP | 0.82 |
| H | 6 | L. Inf. Frontal Lobe             | HAVCR2     | 5  | 156533774 | C      | T | 143 | 36  | p.G86G     | Silent            | SNP | 0.82 |
| H | 6 | L. Inf. Frontal Lobe             | ITPRIP     | 10 | 106075391 | G      | T | 131 | 32  | p.A140D    | Missense_Mutation | SNP | 0.82 |
| H | 6 | L. Inf. Frontal Lobe             | LCE1A      | 1  | 152800271 | G      | T | 128 | 10  | p.G108V    | Missense_Mutation | SNP | 0.82 |
| H | 6 | L. Inf. Frontal Lobe             | LUC7L      | 16 | 249098    | C      | T | 101 | 11  | p.G217E    | Missense_Mutation | SNP | 0.82 |
| H | 6 | L. Inf. Frontal Lobe             | NDUFV1     | 11 | 67379638  | G      | A | 288 | 14  | p.A404T    | Missense_Mutation | SNP | 0.82 |
| H | 6 | L. Inf. Frontal Lobe             | NIT2       | 3  | 100067639 | T      | A | 142 | 7   | NA         | Intron            | SNP | 0.82 |
| H | 6 | L. Inf. Frontal Lobe             | PCNXL2     | 1  | 233372601 | T      | A | 158 | 8   | p.E783V    | Missense_Mutation | SNP | 0.82 |
| H | 6 | L. Inf. Frontal Lobe             | PFN3       | 5  | 176827161 | C      | T | 145 | 50  | NA         | 3'UTR             | SNP | 0.82 |
| H | 6 | L. Inf. Frontal Lobe             | PIEZO2     | 18 | 10760905  | T      | A | 83  | 13  | NA         | Intron            | SNP | 0.82 |
| H | 6 | L. Inf. Frontal Lobe             | RP4-651E10 | 1  | 87099987  | G      | T | 59  | 10  | NA         | RNA               | SNP | 0.82 |
| H | 6 | L. Inf. Frontal Lobe             | SLC15A4    | 12 | 129299469 | G      | C | 352 | 37  | p.V231V    | Silent            | SNP | 0.82 |
| H | 6 | L. Inf. Frontal Lobe             | TNFRSF10D8 | 8  | 23004503  | G      | A | 227 | 39  | p.S151S    | Silent            | SNP | 0.82 |
| H | 6 | L. Inf. Frontal Lobe             | TRAF3IP3   | 1  | 209956260 | C      | T | 352 | 31  | NA         | IGR               | SNP | 0.82 |
| H | 6 | L. Inf. Frontal Lobe             | Unknown    | 2  | 203055147 | C      | T | 127 | 13  | NA         | IGR               | SNP | 0.82 |
| A | 7 | Hilar LN II                      | BMS1       | 10 | 43326373  | G      | A | 123 | 59  | p.K1226K   | Silent            | SNP | 0.29 |
| I | 7 | Medial Temp. Lobe (White Matter) | BMS1       | 10 | 43326373  | G      | A | 332 | 0   | p.K1226K   | Silent            | SNP | 0.19 |
| A | 7 | Hilar LN II                      | C10orf71   | 10 | 50533243  | C      | T | 49  | 77  | p.L885F    | Missense_Mutation | SNP | 0.29 |
| I | 7 | Medial Temp. Lobe (White Matter) | C10orf71   | 10 | 50533243  | C      | T | 198 | 0   | p.L885F    | Missense_Mutation | SNP | 0.19 |
| A | 7 | Hilar LN II                      | C18orf63   | 18 | 71998128  | A      | G | 85  | 0   | p.Q151R    | Missense_Mutation | SNP | 0.29 |
| I | 7 | Medial Temp. Lobe (White Matter) | C18orf63   | 18 | 71998128  | A      | G | 34  | 18  | p.Q151R    | Missense_Mutation | SNP | 0.19 |
| A | 7 | Hilar LN II                      | CDC42BPA   | 1  | 227259976 | C      | G | 139 | 3   | p.K920N    | Missense_Mutation | SNP | 0.29 |
| H | 7 | L. Inf. Frontal Lobe             | CDC42BPA   | 1  | 227259976 | C      | G | 108 | 8   | p.K920N    | Missense_Mutation | SNP | 0.01 |
| I | 7 | Medial Temp. Lobe (White Matter) | CDC42BPA   | 1  | 227259976 | C      | G | 56  | 17  | p.K920N    | Missense_Mutation | SNP | 0.19 |
| A | 7 | Hilar LN II                      | CENPF      | 1  | 214820037 | G      | A | 154 | 46  | p.G2471E   | Missense_Mutation | SNP | 0.29 |
| I | 7 | Medial Temp. Lobe (White Matter) | CENPF      | 1  | 214820037 | G      | A | 96  | 0   | p.G2471E   | Missense_Mutation | SNP | 0.19 |
| A | 7 | Hilar LN II                      | COPSTA     | 12 | 6837444   | C      | A | 201 | 0   | p.H98Q     | Missense_Mutation | SNP | 0.29 |
| I | 7 | Medial Temp. Lobe (White Matter) | COPSTA     | 12 | 6837444   | C      | A | 194 | 29  | p.H98Q     | Missense_Mutation | SNP | 0.19 |
| A | 7 | Hilar LN II                      | COPSTA     | 12 | 6837445   | C      | A | 201 | 0   | p.L99I     | Missense_Mutation | SNP | 0.29 |
| I | 7 | Medial Temp. Lobe (White Matter) | COPSTA     | 12 | 6837445   | C      | A | 199 | 28  | p.L99I     | Missense_Mutation | SNP | 0.19 |
| A | 7 | Hilar LN II                      | CSAD       | 12 | 53567219  | C      | T | 78  | 68  | p.G12G     | Silent            | SNP | 0.29 |
| I | 7 | Medial Temp. Lobe (White Matter) | CSAD       | 12 | 53567219  | C      | T | 238 | 0   | p.G12G     | Silent            | SNP | 0.19 |
| A | 7 | Hilar LN II                      | CWC22      | 2  | 180830685 | T      | C | 73  | 30  | p.D412G    | Missense_Mutation | SNP | 0.29 |
| I | 7 | Medial Temp. Lobe (White Matter) | CWC22      | 2  | 180830685 | T      | C | 109 | 0   | p.D412G    | Missense_Mutation | SNP | 0.19 |
| A | 7 | Hilar LN II                      | DCHS1      | 11 | 6644071   | C      | T | 275 | 127 | p.G2946R   | Missense_Mutation | SNP | 0.29 |
| I | 7 | Medial Temp. Lobe (White Matter) | DCHS1      | 11 | 6644071   | C      | T | 674 | 0   | p.G2946R   | Missense_Mutation | SNP | 0.19 |
| A | 7 | Hilar LN II                      | DOCK10     | 2  | 225670954 | C      | T | 52  | 19  | p.G1235R   | Splice_Site       | SNP | 0.29 |
| I | 7 | Medial Temp. Lobe (White Matter) | DOCK10     | 2  | 225670954 | C      | T | 53  | 0   | p.G1235R   | Splice_Site       | SNP | 0.19 |
| A | 7 | Hilar LN II                      | DZIP3      | 3  | 108373110 | AAG    | - | 375 | 0   | p.K718del  | In_Frame_Del      | DEL | 0.29 |
| I | 7 | Medial Temp. Lobe (White Matter) | DZIP3      | 3  | 108373110 | AAG    | - | 218 | 47  | p.K718del  | In_Frame_Del      | DEL | 0.19 |
| A | 7 | Hilar LN II                      | FADS3      | 11 | 61646204  | -      | A | 89  | 42  | NA         | Intron            | INS | 0.29 |
| I | 7 | Medial Temp. Lobe (White Matter) | FADS3      | 11 | 61646204  | -      | A | 197 | 0   | NA         | Intron            | INS | 0.19 |
| A | 7 | Hilar LN II                      | FGR        | 1  | 27950216  | A      | C | 82  | 113 | p.I71S     | Missense_Mutation | SNP | 0.29 |
| I | 7 | Medial Temp. Lobe (White Matter) | FGR        | 1  | 27950216  | A      | C | 290 | 0   | p.I71S     | Missense_Mutation | SNP | 0.19 |
| A | 7 | Hilar LN II                      | FLRT2      | 14 | 86089366  | C      | T | 136 | 0   | p.A503V    | Missense_Mutation | SNP | 0.29 |
| I | 7 | Medial Temp. Lobe (White Matter) | FLRT2      | 14 | 86089366  | C      | T | 107 | 79  | p.A503V    | Missense_Mutation | SNP | 0.19 |
| A | 7 | Hilar LN II                      | FRY        | 13 | 32818189  | A      | G | 231 | 0   | p.K2233R   | Missense_Mutation | SNP | 0.29 |
| I | 7 | Medial Temp. Lobe (White Matter) | FRY        | 13 | 32818189  | A      | G | 90  | 169 | p.K2233R   | Missense_Mutation | SNP | 0.19 |
| A | 7 | Hilar LN II                      | FRY        | 13 | 32818190  | G      | T | 235 | 0   | p.K2233N   | Missense_Mutation | SNP | 0.29 |
| I | 7 | Medial Temp. Lobe (White Matter) | FRY        | 13 | 32818190  | G      | T | 90  | 169 | p.K2233N   | Missense_Mutation | SNP | 0.19 |
| A | 7 | Hilar LN II                      | GDA        | 9  | 74862340  | C      | T | 107 | 0   | p.L429F    | Missense_Mutation | SNP | 0.29 |
| I | 7 | Medial Temp. Lobe (White Matter) | GDA        | 9  | 74862340  | C      | T | 43  | 15  | p.L429F    | Missense_Mutation | SNP | 0.19 |
| A | 7 | Hilar LN II                      | HECW2      | 2  | 197183421 | C      | T | 23  | 13  | p.E731E    | Silent            | SNP | 0.29 |
| I | 7 | Medial Temp. Lobe (White Matter) | HECW2      | 2  | 197183421 | C      | T | 59  | 0   | p.E731E    | Silent            | SNP | 0.19 |
| A | 7 | Hilar LN II                      | HIVEP2     | 6  | 143089635 | T      | A | 130 | 59  | p.L1742L   | Silent            | SNP | 0.29 |
| I | 7 | Medial Temp. Lobe (White Matter) | HIVEP2     | 6  | 143089635 | T      | A | 98  | 0   | p.L1742L   | Silent            | SNP | 0.19 |
| A | 7 | Hilar LN II                      | KIF22      | 16 | 29811005  | A      | T | 157 | 0   | p.R349S    | Missense_Mutation | SNP | 0.29 |
| I | 7 | Medial Temp. Lobe (White Matter) | KIF22      | 16 | 29811005  | A      | T | 229 | 46  | p.R349S    | Missense_Mutation | SNP | 0.19 |
| A | 7 | Hilar LN II                      | LINC00293  | 8  | 47754995  | G      | A | 124 | 0   | NA         | lincRNA           | SNP | 0.29 |
| I | 7 | Medial Temp. Lobe (White Matter) | LINC00293  | 8  | 47754995  | G      | A | 69  | 23  | NA         | lincRNA           | SNP | 0.19 |
| A | 7 | Hilar LN II                      | MAP1A      | 15 | 43817637  | C      | T | 112 | 0   | p.S1322S   | Silent            | SNP | 0.29 |
| I | 7 | Medial Temp. Lobe (White Matter) | MAP1A      | 15 | 43817637  | C      | T | 52  | 117 | p.S1322S   | Silent            | SNP | 0.19 |
| A | 7 | Hilar LN II                      | MUC12      | 7  | 100648170 | A      | T | 355 | 0   | p.T4919S   | Missense_Mutation | SNP | 0.29 |
| I | 7 | Medial Temp. Lobe (White Matter) | MUC12      | 7  | 100648170 | A      | T | 387 | 49  | p.T4919S   | Missense_Mutation | SNP | 0.19 |
| A | 7 | Hilar LN II                      | NDUFA7     | 19 | 8385752   | C      | T | 225 | 0   | p.E30E     | Silent            | SNP | 0.29 |
| I | 7 | Medial Temp. Lobe (White Matter) | NDUFA7     | 19 | 8385752   | C      | T | 314 | 49  | p.E30E     | Silent            | SNP | 0.19 |
| A | 7 | Hilar LN II                      | NID1       | 1  | 236208939 | G      | A | 153 | 66  | p.S190S    | Silent            | SNP | 0.29 |
| I | 7 | Medial Temp. Lobe (White Matter) | NID1       | 1  | 236208939 | G      | A | 252 | 0   | p.S190S    | Silent            | SNP | 0.19 |
| A | 7 | Hilar LN II                      | NUP188     | 9  | 131742927 | G      | A | 267 | 0   | p.G438R    | Missense_Mutation | SNP | 0.29 |
| I | 7 | Medial Temp. Lobe (White Matter) | NUP188     | 9  | 131742927 | G      | A | 131 | 76  | p.G438R    | Missense_Mutation | SNP | 0.19 |
| A | 7 | Hilar LN II                      | OGFR       | 20 | 61436359  | G      | T | 117 | 1   | p.A50S     | Missense_Mutation | SNP | 0.29 |
| I | 7 | Medial Temp. Lobe (White Matter) | OGFR       | 20 | 61436359  | G      | T | 162 | 84  | p.A50S     | Missense_Mutation | SNP | 0.19 |
| A | 7 | Hilar LN II                      | OR52M1     | 11 | 4566909   | G      | T | 91  | 1   | p.L163L    | Silent            | SNP | 0.29 |
| I | 7 | Medial Temp. Lobe (White Matter) | OR52M1     | 11 | 4566909   | G      | T | 79  | 27  | p.L163L    | Silent            | SNP | 0.19 |
| A | 7 | Hilar LN II                      | PER2       | 2  | 239159365 | A      | G | 131 | 54  | p.H1098H   | Silent            | SNP | 0.29 |
| I | 7 | Medial Temp. Lobe (White Matter) | PER2       | 2  | 239159365 | A      | G | 211 | 1   | p.H1098H   | Silent            | SNP | 0.19 |
| A | 7 | Hilar LN II                      | PHF20L1    | 8  | 133837500 | ATC    | - | 40  | 0   | NA         | Intron            | DEL | 0.29 |
| I | 7 | Medial Temp. Lobe (White Matter) | PHF20L1    | 8  | 133837500 | ATC    | - | 24  | 6   | NA         | Intron            | DEL | 0.19 |
| A | 7 | Hilar LN II                      | PSD        | 10 | 104173665 | A      | G | 264 | 0   | p.S472P    | Missense_Mutation | SNP | 0.29 |
| I | 7 | Medial Temp. Lobe (White Matter) | PSD        | 10 | 104173665 | A      | G | 317 | 80  | p.S472P    | Missense_Mutation | SNP | 0.19 |
| A | 7 | Hilar LN II                      | REEP1      | 2  | 86459794  | G      | A | 246 | 90  | p.G183G    | Silent            | SNP | 0.29 |
| I | 7 | Medial Temp. Lobe (White Matter) | REEP1      | 2  | 86459794  | G      | A | 540 | 0   | p.G183G    | Silent            | SNP | 0.19 |
| A | 7 | Hilar LN II                      | RFX6       | 6  | 117245836 | T      | A | 130 | 42  | p.S520S    | Silent            | SNP | 0.29 |
| I | 7 | Medial Temp. Lobe (White Matter) | RFX6       | 6  | 117245836 | T      | A | 77  | 0   | p.S520S    | Silent            | SNP | 0.19 |
| A | 7 | Hilar LN II                      | RP11-114H2 | 15 | 78207858  | G      | A | 233 | 0   | NA         | lincRNA           | SNP | 0.29 |
| I | 7 | Medial Temp. Lobe (White Matter) | RP11-114H2 | 15 | 78207858  | G      | A | 90  | 215 | NA         | lincRNA           | SNP | 0.19 |
| A | 7 | Hilar LN II                      | SEMA6B     | 19 | 4544550   | G      | A | 56  | 0   | NA         | Intron            | SNP | 0.29 |
| I | 7 | Medial Temp. Lobe (White Matter) | SEMA6B     | 19 | 4544550   | G      | A | 87  | 55  | NA         | Intron            | SNP | 0.19 |
| A | 7 | Hilar LN II                      | SLCO1B1    | 12 | 21331856  | GTA    | - | 134 | 0   | p.210_     | Splice_Site       | DEL | 0.29 |
| I | 7 | Medial Temp. Lobe (White Matter) | SLCO1B1    | 12 | 21331856  | GTA    | - | 56  | 21  | p.210_     | Splice_Site       | DEL | 0.19 |
| A | 7 | Hilar LN II                      | STEAP1     | 7  | 89793812  | CTTCTA | - | 48  | 0   | p.LL262del | In_Frame_Del      | DEL | 0.29 |
| I | 7 | Medial Temp. Lobe (White Matter) | STEAP1     | 7  | 89793812  | CTTCTA | - | 16  | 10  | p.LL262del | In_Frame_Del      | DEL | 0.19 |
| A | 7 | Hilar LN II                      | TMEM8C     | 9  | 136380706 | C      | T | 172 | 46  | p.K141K    | Silent            | SNP | 0.29 |
| I | 7 | Medial Temp. Lobe (White Matter) | TMEM8C     | 9  | 136380706 | C      | T | 299 | 0   | p.K141K    | Silent            | SNP | 0.19 |
| A | 7 | Hilar LN II                      | TOMM70A    | 3  | 100119596 | C      | G | 261 | 0   | p.R66R     | Silent            | SNP | 0.29 |
| I | 7 | Medial Temp. Lobe (White Matter) | TOMM70A    | 3  | 100119596 | C      | G | 417 | 99  | p.R66R     | Silent            | SNP | 0.19 |
| A | 7 | Hilar LN II                      | TOMM70A    | 3  | 100119607 | G      | T | 249 | 0   | p.Q63K     | Missense_Mutation | SNP | 0.29 |
| I | 7 | Medial Temp. Lobe (White Matter) | TOMM70A    | 3  | 100119607 | G      | T | 380 | 92  | p.Q63K     | Missense_Mutation | SNP | 0.19 |

|   |   |                                  |               |          |           |          |          |     |        |                   |                          |      |      |
|---|---|----------------------------------|---------------|----------|-----------|----------|----------|-----|--------|-------------------|--------------------------|------|------|
| A | 7 | Hilar LN II                      | UBAP2L        | 1        | 154207245 | G        | A        | 201 | 63     | NA                | Intron                   | SNP  | 0.29 |
| I | 7 | Medial Temp. Lobe (White Matter) | UBAP2L        | 1        | 154207245 | G        | A        | 420 | 0      | NA                | Intron                   | SNP  | 0.19 |
| A | 7 | Hilar LN II                      | Unknown       | 1        | 120384039 | C        | A        | 286 | 139    | NA                | IGR                      | SNP  | 0.29 |
| I | 7 | Medial Temp. Lobe (White Matter) | Unknown       | 1        | 120384039 | C        | A        | 545 | 0      | NA                | IGR                      | SNP  | 0.19 |
| A | 7 | Hilar LN II                      | ZC3H18        | 16       | 88688677  | G        | A        | 142 | 62     | p.K516K           | Silent                   | SNP  | 0.29 |
| I | 7 | Medial Temp. Lobe (White Matter) | ZC3H18        | 16       | 88688677  | G        | A        | 417 | 0      | p.K516K           | Silent                   | SNP  | 0.19 |
| C | 8 | Inferior Liver                   | AGAP1         | 2        | 237029004 | C        | G        | 361 | 0      | p.N761K           | Missense_Mutation        | SNP  | 0.34 |
| F | 8 | RP Peri-aortic LN                | AGAP1         | 2        | 237029004 | C        | G        | 366 | 32     | p.N761K           | Missense_Mutation        | SNP  | 0.04 |
| C | 8 | Inferior Liver                   | AIM1          | 6        | 106968428 | G        | T        | 78  | 14     | p.M0I             | Missense_Mutation        | SNP  | 0.34 |
| C | 8 | Inferior Liver                   | ATP13A4       | 3        | 193156854 | A        | C        | 211 | 16     | p.D840E           | Splice_Site              | SNP  | 0.34 |
| C | 8 | Inferior Liver                   | C1QL3         | 10       | 16562888  | G        | T        | 346 | 49     | p.I59I            | Silent                   | SNP  | 0.34 |
| C | 8 | Inferior Liver                   | EBLN1         | 10       | 22498597  | T        | A        | 313 | 21     | p.I106F           | Missense_Mutation        | SNP  | 0.34 |
| C | 8 | Inferior Liver                   | EXOC3L1       | 16       | 67222689  | C        | G        | 139 | 48     | p.R121P           | Missense_Mutation        | SNP  | 0.34 |
| C | 8 | Inferior Liver                   | FAM196A       | 10       | 128974153 | C        | T        | 274 | 49     | p.K169K           | Silent                   | SNP  | 0.34 |
| C | 8 | Inferior Liver                   | FAM219A       | 9        | 34405892  | T        | C        | 115 | 0      | p.Y44C            | Missense_Mutation        | SNP  | 0.34 |
| F | 8 | RP Peri-aortic LN                | FAM219A       | 9        | 34405892  | T        | C        | 131 | 10     | p.Y44C            | Missense_Mutation        | SNP  | 0.04 |
| C | 8 | Inferior Liver                   | GNAL          | 18       | 11872357  | C        | G        | 40  | 4      | p.D297E           | Missense_Mutation        | SNP  | 0.34 |
| C | 8 | Inferior Liver                   | HECW1         | 7        | 43496013  | G        | A        | 134 | 26     | p.G873E           | Missense_Mutation        | SNP  | 0.34 |
| C | 8 | Inferior Liver                   | ITSN2         | 2        | 24494728  | C        | G        | 85  | 7      | p.E722Q           | Missense_Mutation        | SNP  | 0.34 |
| C | 8 | Inferior Liver                   | LGALS9C       | 17       | 18380160  | G        | A        | 198 | 15     | NA                | De_novo_Start_OutOfFrame | SNP  | 0.34 |
| C | 8 | Inferior Liver                   | MTMR4         | 17       | 56569081  | -        | CGAGAGAC | 111 | 9      | p.-1177fs         | Frame_Shift_Ins          | INS  | 0.34 |
| F | 8 | RP Peri-aortic LN                | MTMR4         | 17       | 56569081  | -        | CGAGAGAC | 99  | 4      | p.-1177fs         | Frame_Shift_Ins          | INS  | 0.04 |
| C | 8 | Inferior Liver                   | NASP          | 1        | 46079851  | A        | C        | 143 | 15     | p.K530N           | Missense_Mutation        | SNP  | 0.34 |
| C | 8 | Inferior Liver                   | PAF1          | 19       | 39880906  | G        | C        | 269 | 16     | p.P0R             | Missense_Mutation        | SNP  | 0.34 |
| C | 8 | Inferior Liver                   | RASA2         | 3        | 141308953 | TCCC     | -        | 66  | 7      | NA                | Intron                   | DEL  | 0.34 |
| C | 8 | Inferior Liver                   | RCOR2         | 11       | 63681580  | G        | T        | 353 | 85     | p.S246Y           | Missense_Mutation        | SNP  | 0.34 |
| F | 8 | RP Peri-aortic LN                | RCOR2         | 11       | 63681580  | G        | T        | 484 | 18     | p.S246Y           | Missense_Mutation        | SNP  | 0.04 |
| C | 8 | Inferior Liver                   | RIT2          | 18       | 40695492  | G        | A        | 193 | 25     | NA                | 5'UTR                    | SNP  | 0.34 |
| C | 8 | Inferior Liver                   | RPL26L1       | 5        | 172395536 | C        | T        | 232 | 28     | p.Y81Y            | Silent                   | SNP  | 0.34 |
| F | 8 | RP Peri-aortic LN                | RPL26L1       | 5        | 172395536 | C        | T        | 237 | 14     | p.Y81Y            | Silent                   | SNP  | 0.04 |
| C | 8 | Inferior Liver                   | SCARF2        | 22       | 20791861  | G        | T        | 171 | 45     | NA                | Intron                   | SNP  | 0.34 |
| C | 8 | Inferior Liver                   | TCHHL1        | 1        | 152057483 | C        | A        | 172 | 20     | p.R892M           | Missense_Mutation        | SNP  | 0.34 |
| C | 8 | Inferior Liver                   | TOP1          | 20       | 39708751  | -        | AGATGATT | 118 | 19     | p.-122fs          | Frame_Shift_Ins          | INS  | 0.34 |
| F | 8 | RP Peri-aortic LN                | TOP1          | 20       | 39708751  | -        | AGATGATT | 65  | 9      | p.-122fs          | Frame_Shift_Ins          | INS  | 0.04 |
| C | 8 | Inferior Liver                   | UBE3C         | 7        | 157000403 | G        | A        | 68  | 11     | p.G528D           | Missense_Mutation        | SNP  | 0.34 |
| C | 8 | Inferior Liver                   | UBE3C         | 7        | 157009457 | TCCTGCAC | -        | 81  | 8      | NA                | Intron                   | DEL  | 0.34 |
| C | 8 | Inferior Liver                   | ZNF425        | 7        | 148802278 | C        | G        | 284 | 37     | p.G229R           | Missense_Mutation        | SNP  | 0.34 |
| B | 9 | Hilar LN                         | ABCA13        | 7        | 48520751  | G        | A        | 288 | 38     | p.R4365K          | Splice_Site              | SNP  | 0.06 |
| D | 9 | Inferior Liver II                | ABCA13        | 7        | 48520751  | G        | A        | 449 | 0      | p.R4365K          | Splice_Site              | SNP  | 0.11 |
| G | 9 | RP Peri-aortic LN II             | ABCA13        | 7        | 48520751  | G        | A        | 309 | 0      | p.R4365K          | Splice_Site              | SNP  | 0.06 |
| B | 9 | Hilar LN                         | ABCC11        | 16       | 48242394  | C        | T        | 159 | 19     | p.G541E           | Missense_Mutation        | SNP  | 0.06 |
| D | 9 | Inferior Liver II                | ABCC11        | 16       | 48242394  | C        | T        | 223 | 0      | p.G541E           | Missense_Mutation        | SNP  | 0.11 |
| G | 9 | RP Peri-aortic LN II             | ABCC11        | 16       | 48242394  | C        | T        | 179 | 0      | p.G541E           | Missense_Mutation        | SNP  | 0.06 |
| B | 9 | Hilar LN                         | AC002310.1:16 | 30569445 | C         | T        | 179      | 0   | p.W20* | Nonsense_Mutation | SNP                      | 0.06 |      |
| D | 9 | Inferior Liver II                | AC002310.1:16 | 30569445 | C         | T        | 220      | 24  | p.W20* | Nonsense_Mutation | SNP                      | 0.11 |      |
| G | 9 | RP Peri-aortic LN II             | AC002310.1:16 | 30569445 | C         | T        | 228      | 0   | p.W20* | Nonsense_Mutation | SNP                      | 0.06 |      |
| B | 9 | Hilar LN                         | AC006486.9:19 | 42747347 | T         | C        | 262      | 0   | NA     | Intron            | SNP                      | 0.06 |      |
| D | 9 | Inferior Liver II                | AC006486.9:19 | 42747347 | T         | C        | 145      | 216 | NA     | Intron            | SNP                      | 0.11 |      |
| G | 9 | RP Peri-aortic LN II             | AC006486.9:19 | 42747347 | T         | C        | 231      | 0   | NA     | Intron            | SNP                      | 0.06 |      |
| B | 9 | Hilar LN                         | AC073343.1:7  | 6714659  | C         | G        | 142      | 6   | NA     | Intron            | SNP                      | 0.06 |      |
| D | 9 | Inferior Liver II                | AC073343.1:7  | 6714659  | C         | G        | 253      | 0   | NA     | Intron            | SNP                      | 0.11 |      |
| G | 9 | RP Peri-aortic LN II             | AC073343.1:7  | 6714659  | C         | G        | 144      | 0   | NA     | Intron            | SNP                      | 0.06 |      |
| B | 9 | Hilar LN                         | ACER3         | 11       | 76670187  | -        | T        | 52  | 0      | NA                | Intron                   | INS  | 0.06 |
| D | 9 | Inferior Liver II                | ACER3         | 11       | 76670187  | -        | T        | 94  | 29     | NA                | Intron                   | INS  | 0.11 |
| G | 9 | RP Peri-aortic LN II             | ACER3         | 11       | 76670187  | -        | T        | 77  | 0      | NA                | Intron                   | INS  | 0.06 |
| B | 9 | Hilar LN                         | ACP2          | 11       | 47259542  | G        | T        | 587 | 0      | NA                | IGR                      | SNP  | 0.06 |
| D | 9 | Inferior Liver II                | ACP2          | 11       | 47259542  | G        | T        | 460 | 263    | NA                | IGR                      | SNP  | 0.11 |
| G | 9 | RP Peri-aortic LN II             | ACP2          | 11       | 47259542  | G        | T        | 660 | 0      | NA                | IGR                      | SNP  | 0.06 |
| B | 9 | Hilar LN                         | ACP2          | 11       | 47259558  | G        | T        | 581 | 0      | NA                | IGR                      | SNP  | 0.06 |
| D | 9 | Inferior Liver II                | ACP2          | 11       | 47259558  | G        | T        | 454 | 255    | NA                | IGR                      | SNP  | 0.11 |
| G | 9 | RP Peri-aortic LN II             | ACP2          | 11       | 47259558  | G        | T        | 623 | 0      | NA                | IGR                      | SNP  | 0.06 |
| B | 9 | Hilar LN                         | ACTRT3        | 3        | 169482926 | T        | C        | 189 | 0      | NA                | IGR                      | SNP  | 0.06 |
| D | 9 | Inferior Liver II                | ACTRT3        | 3        | 169482926 | T        | C        | 326 | 0      | NA                | IGR                      | SNP  | 0.11 |
| G | 9 | RP Peri-aortic LN II             | ACTRT3        | 3        | 169482926 | T        | C        | 201 | 19     | NA                | IGR                      | SNP  | 0.06 |
| B | 9 | Hilar LN                         | ADAM17        | 2        | 9676904   | T        | C        | 198 | 16     | p.K95R            | Missense_Mutation        | SNP  | 0.06 |
| D | 9 | Inferior Liver II                | ADAM17        | 2        | 9676904   | T        | C        | 280 | 0      | p.K95R            | Missense_Mutation        | SNP  | 0.11 |
| G | 9 | RP Peri-aortic LN II             | ADAM17        | 2        | 9676904   | T        | C        | 222 | 0      | p.K95R            | Missense_Mutation        | SNP  | 0.06 |
| B | 9 | Hilar LN                         | ADGB          | 6        | 147045367 | C        | A        | 144 | 4      | p.A714D           | Missense_Mutation        | SNP  | 0.06 |
| D | 9 | Inferior Liver II                | ADGB          | 6        | 147045367 | C        | A        | 159 | 0      | p.A714D           | Missense_Mutation        | SNP  | 0.11 |
| G | 9 | RP Peri-aortic LN II             | ADGB          | 6        | 147045367 | C        | A        | 99  | 0      | p.A714D           | Missense_Mutation        | SNP  | 0.06 |
| B | 9 | Hilar LN                         | ADIPO2        | 12       | 1882032   | G        | A        | 131 | 5      | p.D66N            | Missense_Mutation        | SNP  | 0.06 |
| D | 9 | Inferior Liver II                | ADIPO2        | 12       | 1882032   | G        | A        | 125 | 0      | p.D66N            | Missense_Mutation        | SNP  | 0.11 |
| G | 9 | RP Peri-aortic LN II             | ADIPO2        | 12       | 1882032   | G        | A        | 118 | 0      | p.D66N            | Missense_Mutation        | SNP  | 0.06 |
| B | 9 | Hilar LN                         | AGRN          | 1        | 981446    | G        | T        | 517 | 0      | p.C928F           | Missense_Mutation        | SNP  | 0.06 |
| D | 9 | Inferior Liver II                | AGRN          | 1        | 981446    | G        | T        | 521 | 0      | p.C928F           | Missense_Mutation        | SNP  | 0.11 |
| G | 9 | RP Peri-aortic LN II             | AGRN          | 1        | 981446    | G        | T        | 400 | 38     | p.C928F           | Missense_Mutation        | SNP  | 0.06 |
| B | 9 | Hilar LN                         | ALDH1A2       | 15       | 58302865  | C        | T        | 148 | 0      | p.G159R           | Missense_Mutation        | SNP  | 0.06 |
| D | 9 | Inferior Liver II                | ALDH1A2       | 15       | 58302865  | C        | T        | 104 | 69     | p.G159R           | Missense_Mutation        | SNP  | 0.11 |
| G | 9 | RP Peri-aortic LN II             | ALDH1A2       | 15       | 58302865  | C        | T        | 113 | 0      | p.G159R           | Missense_Mutation        | SNP  | 0.06 |
| B | 9 | Hilar LN                         | ARHGAP31      | 3        | 119087314 | G        | A        | 312 | 21     | p.R100K           | Missense_Mutation        | SNP  | 0.06 |
| D | 9 | Inferior Liver II                | ARHGAP31      | 3        | 119087314 | G        | A        | 311 | 0      | p.R100K           | Missense_Mutation        | SNP  | 0.11 |
| G | 9 | RP Peri-aortic LN II             | ARHGAP31      | 3        | 119087314 | G        | A        | 282 | 0      | p.R100K           | Missense_Mutation        | SNP  | 0.06 |
| B | 9 | Hilar LN                         | ATG2B         | 14       | 96798695  | CTTACTGG | -        | 203 | 0      | p.PVR470fs        | Frame_Shift_Del          | DEL  | 0.06 |
| D | 9 | Inferior Liver II                | ATG2B         | 14       | 96798695  | CTTACTGG | -        | 168 | 24     | p.PVR470fs        | Frame_Shift_Del          | DEL  | 0.11 |
| G | 9 | RP Peri-aortic LN II             | ATG2B         | 14       | 96798695  | CTTACTGG | -        | 171 | 0      | p.PVR470fs        | Frame_Shift_Del          | DEL  | 0.06 |
| B | 9 | Hilar LN                         | ATP5J2-PTC7   | 99015199 | C         | G        | 135      | 16  | NA     | IGR               | SNP                      | 0.06 |      |
| D | 9 | Inferior Liver II                | ATP5J2-PTC7   | 99015199 | C         | G        | 173      | 0   | NA     | IGR               | SNP                      | 0.11 |      |
| G | 9 | RP Peri-aortic LN II             | ATP5J2-PTC7   | 99015199 | C         | G        | 146      | 0   | NA     | IGR               | SNP                      | 0.06 |      |
| B | 9 | Hilar LN                         | ATP6V1E2      | 2        | 46739251  | C        | A        | 92  | 5      | p.L200L           | Silent                   | SNP  | 0.06 |
| D | 9 | Inferior Liver II                | ATP6V1E2      | 2        | 46739251  | C        | A        | 129 | 0      | p.L200L           | Silent                   | SNP  | 0.11 |
| G | 9 | RP Peri-aortic LN II             | ATP6V1E2      | 2        | 46739251  | C        | A        | 83  | 0      | p.L200L           | Silent                   | SNP  | 0.06 |
| B | 9 | Hilar LN                         | ATP6V1E2      | 2        | 46739252  | A        | C        | 92  | 5      | p.L200R           | Missense_Mutation        | SNP  | 0.06 |
| D | 9 | Inferior Liver II                | ATP6V1E2      | 2        | 46739252  | A        | C        | 133 | 0      | p.L200R           | Missense_Mutation        | SNP  | 0.11 |
| G | 9 | RP Peri-aortic LN II             | ATP6V1E2      | 2        | 46739252  | A        | C        | 83  | 0      | p.L200R           | Missense_Mutation        | SNP  | 0.06 |
| B | 9 | Hilar LN                         | B3GNT3        | 19       | 17922438  | G        | A        | 139 | 10     | p.G209E           | Missense_Mutation        | SNP  | 0.06 |
| D | 9 | Inferior Liver II                | B3GNT3        | 19       | 17922438  | G        | A        | 175 | 0      | p.G209E           | Missense_Mutation        | SNP  | 0.11 |
| G | 9 | RP Peri-aortic LN II             | B3GNT3        | 19       | 17922438  | G        | A        | 140 | 0      | p.G209E           | Missense_Mutation        | SNP  | 0.06 |
| B | 9 | Hilar LN                         | BACE2         | 21       | 42551412  | G        | A        | 322 | 0      | NA                | Intron                   | SNP  | 0.06 |
| D | 9 | Inferior Liver II                | BACE2         | 21       | 42551412  | G        | A        | 265 | 45     | NA                | Intron                   | SNP  | 0.11 |
| G | 9 | RP Peri-aortic LN II             | BACE2         | 21       | 42551412  | G        | A        | 237 | 0      | NA                | Intron                   | SNP  | 0.06 |
| B | 9 | Hilar LN                         | C14orf177     | 14       | 99182635  | T        | A        | 366 | 33     | p.L36H            | Missense_Mutation        | SNP  | 0.06 |
| D | 9 | Inferior Liver II                | C14orf177     | 14       | 99182635  | T        | A        | 379 | 0      | p.L36H            | Missense_Mutation        | SNP  | 0.11 |
| G | 9 | RP Peri-aortic LN II             | C14orf177     | 14       | 99182635  | T        | A        | 363 | 1      | p.L36H            | Missense_Mutation        | SNP  | 0.06 |
| B | 9 | Hilar LN                         | C19orf12      | 19       | 30192111  | G        | A        | 145 | 11     | NA                | 5'Flank                  | SNP  | 0.06 |
| D | 9 | Inferior Liver II                | C19orf12      | 19       | 30192111  | G        | A        | 209 | 0      | NA                | 5'Flank                  | SNP  | 0.11 |
| G | 9 | RP Peri-aortic LN II             | C19orf12      | 19       | 30192111  | G        | A        | 127 | 0      | NA                | 5'Flank                  | SNP  | 0.06 |

|   |   |                      |          |    |           |           |   |     |     |          |                   |     |      |
|---|---|----------------------|----------|----|-----------|-----------|---|-----|-----|----------|-------------------|-----|------|
| B | 9 | Hilar LN             | C7orf10  | 7  | 40535993  | T         | G | 179 | 10  | NA       | Intron            | SNP | 0.06 |
| D | 9 | Inferior Liver II    | C7orf10  | 7  | 40535993  | T         | G | 231 | 0   | NA       | Intron            | SNP | 0.11 |
| G | 9 | RP Peri-aortic LN II | C7orf10  | 7  | 40535993  | T         | G | 145 | 0   | NA       | Intron            | SNP | 0.06 |
| B | 9 | Hilar LN             | CACNA1A  | 19 | 13419310  | C         | A | 33  | 3   | p.W568C  | Missense_Mutation | SNP | 0.06 |
| D | 9 | Inferior Liver II    | CACNA1A  | 19 | 13419310  | C         | A | 67  | 0   | p.W568C  | Missense_Mutation | SNP | 0.11 |
| G | 9 | RP Peri-aortic LN II | CACNA1A  | 19 | 13419310  | C         | A | 46  | 0   | p.W568C  | Missense_Mutation | SNP | 0.06 |
| B | 9 | Hilar LN             | CASP4    | 11 | 104820288 | C         | A | 236 | 17  | p.V255F  | Missense_Mutation | SNP | 0.06 |
| D | 9 | Inferior Liver II    | CASP4    | 11 | 104820288 | C         | A | 334 | 0   | p.V255F  | Missense_Mutation | SNP | 0.11 |
| G | 9 | RP Peri-aortic LN II | CASP4    | 11 | 104820288 | C         | A | 240 | 0   | p.V255F  | Missense_Mutation | SNP | 0.06 |
| B | 9 | Hilar LN             | CASP8AP2 | 6  | 90576828  | G         | A | 197 | 10  | NA       | RNA               | SNP | 0.06 |
| D | 9 | Inferior Liver II    | CASP8AP2 | 6  | 90576828  | G         | A | 232 | 0   | NA       | RNA               | SNP | 0.11 |
| G | 9 | RP Peri-aortic LN II | CASP8AP2 | 6  | 90576828  | G         | A | 188 | 0   | NA       | RNA               | SNP | 0.06 |
| B | 9 | Hilar LN             | CCDC108  | 2  | 219900321 | G         | T | 180 | 0   | p.V141V  | Silent            | SNP | 0.06 |
| D | 9 | Inferior Liver II    | CCDC108  | 2  | 219900321 | G         | T | 192 | 0   | p.V141V  | Silent            | SNP | 0.11 |
| G | 9 | RP Peri-aortic LN II | CCDC108  | 2  | 219900321 | G         | T | 138 | 16  | p.V141V  | Silent            | SNP | 0.06 |
| B | 9 | Hilar LN             | CCDC82   | 11 | 96106579  | C         | A | 43  | 0   | p.L348L  | Silent            | SNP | 0.06 |
| D | 9 | Inferior Liver II    | CCDC82   | 11 | 96106579  | C         | A | 114 | 0   | p.L348L  | Silent            | SNP | 0.11 |
| G | 9 | RP Peri-aortic LN II | CCDC82   | 11 | 96106579  | C         | A | 68  | 11  | p.L348L  | Silent            | SNP | 0.06 |
| B | 9 | Hilar LN             | CCDC90B  | 11 | 82977012  | T         | - | 48  | 0   | p.T202fs | Frame_Shift_Del   | DEL | 0.06 |
| D | 9 | Inferior Liver II    | CCDC90B  | 11 | 82977012  | T         | - | 106 | 0   | p.T202fs | Frame_Shift_Del   | DEL | 0.11 |
| G | 9 | RP Peri-aortic LN II | CCDC90B  | 11 | 82977012  | T         | - | 47  | 17  | p.T202fs | Frame_Shift_Del   | DEL | 0.06 |
| B | 9 | Hilar LN             | CD72     | 9  | 35617227  | G         | T | 135 | 0   | p.P70T   | Missense_Mutation | SNP | 0.06 |
| D | 9 | Inferior Liver II    | CD72     | 9  | 35617227  | G         | T | 118 | 52  | p.P70T   | Missense_Mutation | SNP | 0.11 |
| G | 9 | RP Peri-aortic LN II | CD72     | 9  | 35617227  | G         | T | 204 | 0   | p.P70T   | Missense_Mutation | SNP | 0.06 |
| B | 9 | Hilar LN             | CDKL1    | 14 | 50796850  | T         | C | 131 | 0   | NA       | IGR               | SNP | 0.06 |
| D | 9 | Inferior Liver II    | CDKL1    | 14 | 50796850  | T         | C | 120 | 19  | NA       | IGR               | SNP | 0.11 |
| G | 9 | RP Peri-aortic LN II | CDKL1    | 14 | 50796850  | T         | C | 90  | 0   | NA       | IGR               | SNP | 0.06 |
| B | 9 | Hilar LN             | CDKL1    | 14 | 50863781  | GCCGAGTC- | - | 105 | 8   | NA       | Intron            | DEL | 0.06 |
| D | 9 | Inferior Liver II    | CDKL1    | 14 | 50863781  | GCCGAGTC- | - | 100 | 0   | NA       | Intron            | DEL | 0.11 |
| G | 9 | RP Peri-aortic LN II | CDKL1    | 14 | 50863781  | GCCGAGTC- | - | 81  | 0   | NA       | Intron            | DEL | 0.06 |
| B | 9 | Hilar LN             | CHRNA2   | 2  | 233409518 | GC        | - | 398 | 0   | p.G429fs | Frame_Shift_Del   | DEL | 0.06 |
| D | 9 | Inferior Liver II    | CHRNA2   | 2  | 233409518 | GC        | - | 561 | 0   | p.G429fs | Frame_Shift_Del   | DEL | 0.11 |
| G | 9 | RP Peri-aortic LN II | CHRNA2   | 2  | 233409518 | GC        | - | 320 | 37  | p.G429fs | Frame_Shift_Del   | DEL | 0.06 |
| B | 9 | Hilar LN             | CNTNAP4  | 16 | 76523696  | C         | A | 183 | 9   | p.L666I  | Missense_Mutation | SNP | 0.06 |
| D | 9 | Inferior Liver II    | CNTNAP4  | 16 | 76523696  | C         | A | 212 | 0   | p.L666I  | Missense_Mutation | SNP | 0.11 |
| G | 9 | RP Peri-aortic LN II | CNTNAP4  | 16 | 76523696  | C         | A | 152 | 0   | p.L666I  | Missense_Mutation | SNP | 0.06 |
| B | 9 | Hilar LN             | COL5A2   | 2  | 189929325 | C         | T | 376 | 1   | p.G558G  | Silent            | SNP | 0.06 |
| D | 9 | Inferior Liver II    | COL5A2   | 2  | 189929325 | C         | T | 397 | 0   | p.G558G  | Silent            | SNP | 0.11 |
| G | 9 | RP Peri-aortic LN II | COL5A2   | 2  | 189929325 | C         | T | 301 | 114 | p.G558G  | Silent            | SNP | 0.06 |
| B | 9 | Hilar LN             | CREBBP   | 16 | 3788671   | C         | T | 275 | 0   | p.R1428H | Missense_Mutation | SNP | 0.06 |
| D | 9 | Inferior Liver II    | CREBBP   | 16 | 3788671   | C         | T | 256 | 28  | p.R1428H | Missense_Mutation | SNP | 0.11 |
| G | 9 | RP Peri-aortic LN II | CREBBP   | 16 | 3788671   | C         | T | 315 | 0   | p.R1428H | Missense_Mutation | SNP | 0.06 |
| B | 9 | Hilar LN             | CSF3R    | 1  | 36937062  | G         | - | 557 | 0   | p.P419fs | Frame_Shift_Del   | DEL | 0.06 |
| D | 9 | Inferior Liver II    | CSF3R    | 1  | 36937062  | G         | - | 665 | 81  | p.P419fs | Frame_Shift_Del   | DEL | 0.11 |
| G | 9 | RP Peri-aortic LN II | CSF3R    | 1  | 36937062  | G         | - | 636 | 0   | p.P419fs | Frame_Shift_Del   | DEL | 0.06 |
| B | 9 | Hilar LN             | CSTF3    | 11 | 33129549  | T         | A | 36  | 0   | NA       | Intron            | SNP | 0.06 |
| D | 9 | Inferior Liver II    | CSTF3    | 11 | 33129549  | T         | A | 80  | 0   | NA       | Intron            | SNP | 0.11 |
| G | 9 | RP Peri-aortic LN II | CSTF3    | 11 | 33129549  | T         | A | 51  | 4   | NA       | Intron            | SNP | 0.06 |
| B | 9 | Hilar LN             | CUTA     | 6  | 33385350  | C         | A | 331 | 0   | p.P55P   | Silent            | SNP | 0.06 |
| D | 9 | Inferior Liver II    | CUTA     | 6  | 33385350  | C         | A | 402 | 88  | p.P55P   | Silent            | SNP | 0.11 |
| G | 9 | RP Peri-aortic LN II | CUTA     | 6  | 33385350  | C         | A | 338 | 0   | p.P55P   | Silent            | SNP | 0.06 |
| B | 9 | Hilar LN             | DENND4C  | 9  | 19346556  | A         | T | 214 | 0   | p.G978G  | Silent            | SNP | 0.06 |
| D | 9 | Inferior Liver II    | DENND4C  | 9  | 19346556  | A         | T | 236 | 66  | p.G978G  | Silent            | SNP | 0.11 |
| G | 9 | RP Peri-aortic LN II | DENND4C  | 9  | 19346556  | A         | T | 264 | 0   | p.G978G  | Silent            | SNP | 0.06 |
| B | 9 | Hilar LN             | DHX57    | 2  | 39090553  | C         | T | 169 | 0   | p.V111V  | Silent            | SNP | 0.06 |
| D | 9 | Inferior Liver II    | DHX57    | 2  | 39090553  | C         | T | 206 | 19  | p.V111V  | Silent            | SNP | 0.11 |
| G | 9 | RP Peri-aortic LN II | DHX57    | 2  | 39090553  | C         | T | 150 | 0   | p.V111V  | Silent            | SNP | 0.06 |
| B | 9 | Hilar LN             | DIDO1    | 20 | 61511915  | G         | C | 340 | 18  | p.A1798G | Missense_Mutation | SNP | 0.06 |
| D | 9 | Inferior Liver II    | DIDO1    | 20 | 61511915  | G         | C | 304 | 0   | p.A1798G | Missense_Mutation | SNP | 0.11 |
| G | 9 | RP Peri-aortic LN II | DIDO1    | 20 | 61511915  | G         | C | 272 | 0   | p.A1798G | Missense_Mutation | SNP | 0.06 |
| B | 9 | Hilar LN             | DNAH14   | 1  | 225268153 | G         | A | 57  | 0   | p.G881R  | Missense_Mutation | SNP | 0.06 |
| D | 9 | Inferior Liver II    | DNAH14   | 1  | 225268153 | G         | A | 107 | 5   | p.G881R  | Missense_Mutation | SNP | 0.11 |
| G | 9 | RP Peri-aortic LN II | DNAH14   | 1  | 225268153 | G         | A | 86  | 0   | p.G881R  | Missense_Mutation | SNP | 0.06 |
| B | 9 | Hilar LN             | DNAH14   | 1  | 225465179 | G         | A | 142 | 7   | NA       | Intron            | SNP | 0.06 |
| D | 9 | Inferior Liver II    | DNAH14   | 1  | 225465179 | G         | A | 237 | 0   | NA       | Intron            | SNP | 0.11 |
| G | 9 | RP Peri-aortic LN II | DNAH14   | 1  | 225465179 | G         | A | 169 | 0   | NA       | Intron            | SNP | 0.06 |
| B | 9 | Hilar LN             | DNM1     | 9  | 131002043 | G         | C | 100 | 0   | p.K510N  | Missense_Mutation | SNP | 0.06 |
| D | 9 | Inferior Liver II    | DNM1     | 9  | 131002043 | G         | C | 123 | 0   | p.K510N  | Missense_Mutation | SNP | 0.11 |
| G | 9 | RP Peri-aortic LN II | DNM1     | 9  | 131002043 | G         | C | 76  | 25  | p.K510N  | Missense_Mutation | SNP | 0.06 |
| B | 9 | Hilar LN             | DOCK8    | 9  | 304662    | G         | C | 366 | 10  | p.T162T  | Silent            | SNP | 0.06 |
| D | 9 | Inferior Liver II    | DOCK8    | 9  | 304662    | G         | C | 591 | 0   | p.T162T  | Silent            | SNP | 0.11 |
| G | 9 | RP Peri-aortic LN II | DOCK8    | 9  | 304662    | G         | C | 499 | 0   | p.T162T  | Silent            | SNP | 0.06 |
| B | 9 | Hilar LN             | DVL2     | 17 | 7133144   | C         | T | 102 | 0   | p.E213E  | Silent            | SNP | 0.06 |
| D | 9 | Inferior Liver II    | DVL2     | 17 | 7133144   | C         | T | 67  | 51  | p.E213E  | Silent            | SNP | 0.11 |
| G | 9 | RP Peri-aortic LN II | DVL2     | 17 | 7133144   | C         | T | 74  | 0   | p.E213E  | Silent            | SNP | 0.06 |
| B | 9 | Hilar LN             | DYM      | 18 | 46904998  | C         | T | 115 | 0   | NA       | 5'UTR             | SNP | 0.06 |
| D | 9 | Inferior Liver II    | DYM      | 18 | 46904998  | C         | T | 200 | 22  | NA       | 5'UTR             | SNP | 0.11 |
| G | 9 | RP Peri-aortic LN II | DYM      | 18 | 46904998  | C         | T | 130 | 0   | NA       | 5'UTR             | SNP | 0.06 |
| B | 9 | Hilar LN             | DZIP3    | 3  | 108409662 | G         | A | 131 | 6   | p.G1182E | Missense_Mutation | SNP | 0.06 |
| D | 9 | Inferior Liver II    | DZIP3    | 3  | 108409662 | G         | A | 151 | 0   | p.G1182E | Missense_Mutation | SNP | 0.11 |
| G | 9 | RP Peri-aortic LN II | DZIP3    | 3  | 108409662 | G         | A | 132 | 0   | p.G1182E | Missense_Mutation | SNP | 0.06 |
| B | 9 | Hilar LN             | EFCAB4A  | 11 | 830401    | G         | A | 170 | 0   | NA       | Intron            | SNP | 0.06 |
| D | 9 | Inferior Liver II    | EFCAB4A  | 11 | 830401    | G         | A | 273 | 40  | NA       | Intron            | SNP | 0.11 |
| G | 9 | RP Peri-aortic LN II | EFCAB4A  | 11 | 830401    | G         | A | 194 | 0   | NA       | Intron            | SNP | 0.06 |
| B | 9 | Hilar LN             | EGFLAM   | 5  | 38462974  | A         | C | 75  | 0   | NA       | Intron            | SNP | 0.06 |
| D | 9 | Inferior Liver II    | EGFLAM   | 5  | 38462974  | A         | C | 77  | 0   | NA       | Intron            | SNP | 0.11 |
| G | 9 | RP Peri-aortic LN II | EGFLAM   | 5  | 38462974  | A         | C | 54  | 7   | NA       | Intron            | SNP | 0.06 |
| B | 9 | Hilar LN             | ELMO2    | 20 | 45016069  | C         | T | 277 | 0   | p.E145K  | Missense_Mutation | SNP | 0.06 |
| D | 9 | Inferior Liver II    | ELMO2    | 20 | 45016069  | C         | T | 164 | 64  | p.E145K  | Missense_Mutation | SNP | 0.11 |
| G | 9 | RP Peri-aortic LN II | ELMO2    | 20 | 45016069  | C         | T | 251 | 0   | p.E145K  | Missense_Mutation | SNP | 0.06 |
| B | 9 | Hilar LN             | FAM71E1  | 19 | 50979143  | C         | T | 141 | 0   | p.G103S  | Missense_Mutation | SNP | 0.06 |
| D | 9 | Inferior Liver II    | FAM71E1  | 19 | 50979143  | C         | T | 170 | 0   | p.G103S  | Missense_Mutation | SNP | 0.11 |
| G | 9 | RP Peri-aortic LN II | FAM71E1  | 19 | 50979143  | C         | T | 101 | 12  | p.G103S  | Missense_Mutation | SNP | 0.06 |
| B | 9 | Hilar LN             | FAT3     | 11 | 92600035  | G         | A | 309 | 0   | p.T3929T | Silent            | SNP | 0.06 |
| D | 9 | Inferior Liver II    | FAT3     | 11 | 92600035  | G         | A | 311 | 30  | p.T3929T | Silent            | SNP | 0.11 |
| G | 9 | RP Peri-aortic LN II | FAT3     | 11 | 92600035  | G         | A | 359 | 0   | p.T3929T | Silent            | SNP | 0.06 |
| B | 9 | Hilar LN             | FER1L6   | 8  | 125047586 | C         | T | 241 | 11  | p.S785S  | Silent            | SNP | 0.06 |
| D | 9 | Inferior Liver II    | FER1L6   | 8  | 125047586 | C         | T | 306 | 0   | p.S785S  | Silent            | SNP | 0.11 |
| G | 9 | RP Peri-aortic LN II | FER1L6   | 8  | 125047586 | C         | T | 251 | 0   | p.S785S  | Silent            | SNP | 0.06 |
| B | 9 | Hilar LN             | FGFR1    | 8  | 38271538  | G         | T | 547 | 0   | p.Y730*  | Nonsense_Mutation | SNP | 0.06 |
| D | 9 | Inferior Liver II    | FGFR1    | 8  | 38271538  | G         | T | 763 | 0   | p.Y730*  | Nonsense_Mutation | SNP | 0.11 |
| G | 9 | RP Peri-aortic LN II | FGFR1    | 8  | 38271538  | G         | T | 445 | 158 | p.Y730*  | Nonsense_Mutation | SNP | 0.06 |
| B | 9 | Hilar LN             | FKBP1C   | 6  | 63921594  | A         | C | 526 | 0   | p.K45Q   | Missense_Mutation | SNP | 0.06 |
| D | 9 | Inferior Liver II    | FKBP1C   | 6  | 63921594  | A         | C | 500 | 53  | p.K45Q   | Missense_Mutation | SNP | 0.11 |
| G | 9 | RP Peri-aortic LN II | FKBP1C   | 6  | 63921594  | A         | C | 509 | 0   | p.K45Q   | Missense_Mutation | SNP | 0.06 |
| B | 9 | Hilar LN             | FKBP1C   | 6  | 63921616  | G         | T | 550 | 0   | p.G52V   | Missense_Mutation | SNP | 0.06 |

|   |   |                      |              |           |           |          |     |     |     |          |                   |      |      |
|---|---|----------------------|--------------|-----------|-----------|----------|-----|-----|-----|----------|-------------------|------|------|
| D | 9 | Inferior Liver II    | FKBP1C       | 6         | 63921616  | G        | T   | 513 | 52  | p.G52V   | Missense_Mutation | SNP  | 0.11 |
| G | 9 | RP Peri-aortic LN II | FKBP1C       | 6         | 63921616  | G        | T   | 533 | 0   | p.G52V   | Missense_Mutation | SNP  | 0.06 |
| B | 9 | Hilar LN             | FRS3         | 6         | 41739127  | G        | C   | 99  | 0   | p.P237A  | Missense_Mutation | SNP  | 0.06 |
| D | 9 | Inferior Liver II    | FRS3         | 6         | 41739127  | G        | C   | 128 | 0   | p.P237A  | Missense_Mutation | SNP  | 0.11 |
| G | 9 | RP Peri-aortic LN II | FRS3         | 6         | 41739127  | G        | C   | 104 | 9   | p.P237A  | Missense_Mutation | SNP  | 0.06 |
| B | 9 | Hilar LN             | GAS1         | 9         | 89561443  | C        | A   | 115 | 0   | p.A84A   | Silent            | SNP  | 0.06 |
| D | 9 | Inferior Liver II    | GAS1         | 9         | 89561443  | C        | A   | 179 | 0   | p.A84A   | Silent            | SNP  | 0.11 |
| G | 9 | RP Peri-aortic LN II | GAS1         | 9         | 89561443  | C        | A   | 129 | 18  | p.A84A   | Silent            | SNP  | 0.06 |
| B | 9 | Hilar LN             | GCK          | 7         | 44198667  | C        | A   | 338 | 0   | NA       | Intron            | SNP  | 0.06 |
| D | 9 | Inferior Liver II    | GCK          | 7         | 44198667  | C        | A   | 319 | 104 | NA       | Intron            | SNP  | 0.11 |
| G | 9 | RP Peri-aortic LN II | GCK          | 7         | 44198667  | C        | A   | 361 | 0   | NA       | Intron            | SNP  | 0.06 |
| B | 9 | Hilar LN             | GCNT2        | 6         | 10556698  | TAGTGTAA | -   | 261 | 0   | NA       | Intron            | DEL  | 0.06 |
| D | 9 | Inferior Liver II    | GCNT2        | 6         | 10556698  | TAGTGTAA | -   | 263 | 78  | NA       | Intron            | DEL  | 0.11 |
| G | 9 | RP Peri-aortic LN II | GCNT2        | 6         | 10556698  | TAGTGTAA | -   | 197 | 0   | NA       | Intron            | DEL  | 0.06 |
| B | 9 | Hilar LN             | GCNT3        | 15        | 59911455  | C        | T   | 200 | 0   | p.R340W  | Missense_Mutation | SNP  | 0.06 |
| D | 9 | Inferior Liver II    | GCNT3        | 15        | 59911455  | C        | T   | 85  | 84  | p.R340W  | Missense_Mutation | SNP  | 0.11 |
| G | 9 | RP Peri-aortic LN II | GCNT3        | 15        | 59911455  | C        | T   | 168 | 0   | p.R340W  | Missense_Mutation | SNP  | 0.06 |
| B | 9 | Hilar LN             | GDF7         | 2         | 20871169  | C        | A   | 188 | 5   | p.A446D  | Missense_Mutation | SNP  | 0.06 |
| D | 9 | Inferior Liver II    | GDF7         | 2         | 20871169  | C        | A   | 191 | 1   | p.A446D  | Missense_Mutation | SNP  | 0.11 |
| G | 9 | RP Peri-aortic LN II | GDF7         | 2         | 20871169  | C        | A   | 199 | 0   | p.A446D  | Missense_Mutation | SNP  | 0.06 |
| B | 9 | Hilar LN             | GIMAP6       | 7         | 150325338 | G        | A   | 222 | 12  | p.I116I  | Silent            | SNP  | 0.06 |
| D | 9 | Inferior Liver II    | GIMAP6       | 7         | 150325338 | G        | A   | 259 | 0   | p.I116I  | Silent            | SNP  | 0.11 |
| G | 9 | RP Peri-aortic LN II | GIMAP6       | 7         | 150325338 | G        | A   | 194 | 1   | p.I116I  | Silent            | SNP  | 0.06 |
| B | 9 | Hilar LN             | GK2          | 4         | 80328219  | A        | G   | 194 | 16  | p.I0T    | Missense_Mutation | SNP  | 0.06 |
| D | 9 | Inferior Liver II    | GK2          | 4         | 80328219  | A        | G   | 178 | 0   | p.I0T    | Missense_Mutation | SNP  | 0.11 |
| G | 9 | RP Peri-aortic LN II | GK2          | 4         | 80328219  | A        | G   | 132 | 0   | p.I0T    | Missense_Mutation | SNP  | 0.06 |
| B | 9 | Hilar LN             | GLRA3        | 4         | 175649754 | G        | T   | 181 | 18  | p.S121S  | Silent            | SNP  | 0.06 |
| D | 9 | Inferior Liver II    | GLRA3        | 4         | 175649754 | G        | T   | 180 | 0   | p.S121S  | Silent            | SNP  | 0.11 |
| G | 9 | RP Peri-aortic LN II | GLRA3        | 4         | 175649754 | G        | T   | 144 | 0   | p.S121S  | Silent            | SNP  | 0.06 |
| B | 9 | Hilar LN             | GNPTAB       | 12        | 102155369 | C        | A   | 238 | 17  | p.R963L  | Missense_Mutation | SNP  | 0.06 |
| D | 9 | Inferior Liver II    | GNPTAB       | 12        | 102155369 | C        | A   | 407 | 1   | p.R963L  | Missense_Mutation | SNP  | 0.11 |
| G | 9 | RP Peri-aortic LN II | GNPTAB       | 12        | 102155369 | C        | A   | 236 | 0   | p.R963L  | Missense_Mutation | SNP  | 0.06 |
| B | 9 | Hilar LN             | GPC2         | 7         | 99768881  | C        | T   | 170 | 0   | NA       | Intron            | SNP  | 0.06 |
| D | 9 | Inferior Liver II    | GPC2         | 7         | 99768881  | C        | T   | 213 | 0   | NA       | Intron            | SNP  | 0.11 |
| G | 9 | RP Peri-aortic LN II | GPC2         | 7         | 99768881  | C        | T   | 199 | 13  | NA       | Intron            | SNP  | 0.06 |
| B | 9 | Hilar LN             | GPR144       | 9         | 127214391 | C        | T   | 49  | 0   | p.P26P   | Silent            | SNP  | 0.06 |
| D | 9 | Inferior Liver II    | GPR144       | 9         | 127214391 | C        | T   | 73  | 33  | p.P26P   | Silent            | SNP  | 0.11 |
| G | 9 | RP Peri-aortic LN II | GPR144       | 9         | 127214391 | C        | T   | 69  | 0   | p.P26P   | Silent            | SNP  | 0.06 |
| B | 9 | Hilar LN             | GREB1L       | 18        | 19079731  | G        | A   | 245 | 0   | p.D1145N | Missense_Mutation | SNP  | 0.06 |
| D | 9 | Inferior Liver II    | GREB1L       | 18        | 19079731  | G        | A   | 253 | 0   | p.D1145N | Missense_Mutation | SNP  | 0.11 |
| G | 9 | RP Peri-aortic LN II | GREB1L       | 18        | 19079731  | G        | A   | 291 | 27  | p.D1145N | Missense_Mutation | SNP  | 0.06 |
| B | 9 | Hilar LN             | GREB1L       | 18        | 19080582  | G        | C   | 141 | 0   | p.D1351H | Missense_Mutation | SNP  | 0.06 |
| D | 9 | Inferior Liver II    | GREB1L       | 18        | 19080582  | G        | C   | 158 | 0   | p.D1351H | Missense_Mutation | SNP  | 0.11 |
| G | 9 | RP Peri-aortic LN II | GREB1L       | 18        | 19080582  | G        | C   | 141 | 17  | p.D1351H | Missense_Mutation | SNP  | 0.06 |
| B | 9 | Hilar LN             | GRINA        | 8         | 145065673 | C        | T   | 65  | 0   | p.Y94Y   | Silent            | SNP  | 0.06 |
| D | 9 | Inferior Liver II    | GRINA        | 8         | 145065673 | C        | T   | 104 | 10  | p.Y94Y   | Silent            | SNP  | 0.11 |
| G | 9 | RP Peri-aortic LN II | GRINA        | 8         | 145065673 | C        | T   | 77  | 0   | p.Y94Y   | Silent            | SNP  | 0.06 |
| B | 9 | Hilar LN             | GSTA1        | 6         | 52661067  | C        | T   | 254 | 12  | p.G62E   | Missense_Mutation | SNP  | 0.06 |
| D | 9 | Inferior Liver II    | GSTA1        | 6         | 52661067  | C        | T   | 347 | 0   | p.G62E   | Missense_Mutation | SNP  | 0.11 |
| G | 9 | RP Peri-aortic LN II | GSTA1        | 6         | 52661067  | C        | T   | 237 | 0   | p.G62E   | Missense_Mutation | SNP  | 0.06 |
| B | 9 | Hilar LN             | HERC1        | 15        | 63953194  | G        | T   | 114 | 0   | p.G3067G | Silent            | SNP  | 0.06 |
| D | 9 | Inferior Liver II    | HERC1        | 15        | 63953194  | G        | T   | 129 | 21  | p.G3067G | Silent            | SNP  | 0.11 |
| G | 9 | RP Peri-aortic LN II | HERC1        | 15        | 63953194  | G        | T   | 88  | 0   | p.G3067G | Silent            | SNP  | 0.06 |
| B | 9 | Hilar LN             | HIST1H4L     | 6         | 27841084  | C        | T   | 319 | 1   | p.D69N   | Missense_Mutation | SNP  | 0.06 |
| D | 9 | Inferior Liver II    | HIST1H4L     | 6         | 27841084  | C        | T   | 433 | 62  | p.D69N   | Missense_Mutation | SNP  | 0.11 |
| G | 9 | RP Peri-aortic LN II | HIST1H4L     | 6         | 27841084  | C        | T   | 334 | 0   | p.D69N   | Missense_Mutation | SNP  | 0.06 |
| B | 9 | Hilar LN             | HMCN1        | 1         | 186121934 | T        | A   | 527 | 0   | p.S4983S | Silent            | SNP  | 0.06 |
| D | 9 | Inferior Liver II    | HMCN1        | 1         | 186121934 | T        | A   | 781 | 74  | p.S4983S | Silent            | SNP  | 0.11 |
| G | 9 | RP Peri-aortic LN II | HMCN1        | 1         | 186121934 | T        | A   | 623 | 0   | p.S4983S | Silent            | SNP  | 0.06 |
| B | 9 | Hilar LN             | HNRNPUL2-11  | 62458807  | C         | G        | 377 | 29  | NA  | 3'UTR    | SNP               | 0.06 |      |
| D | 9 | Inferior Liver II    | HNRNPUL2-11  | 62458807  | C         | G        | 470 | 0   | NA  | 3'UTR    | SNP               | 0.11 |      |
| G | 9 | RP Peri-aortic LN II | HNRNPUL2-11  | 62458807  | C         | G        | 399 | 0   | NA  | 3'UTR    | SNP               | 0.06 |      |
| B | 9 | Hilar LN             | HS3ST4       | 16        | 26147134  | G        | T   | 217 | 13  | p.E312D  | Missense_Mutation | SNP  | 0.06 |
| D | 9 | Inferior Liver II    | HS3ST4       | 16        | 26147134  | G        | T   | 261 | 0   | p.E312D  | Missense_Mutation | SNP  | 0.11 |
| G | 9 | RP Peri-aortic LN II | HS3ST4       | 16        | 26147134  | G        | T   | 274 | 0   | p.E312D  | Missense_Mutation | SNP  | 0.06 |
| B | 9 | Hilar LN             | HSP90AA4P 4  | 190396283 | C         | G        | 184 | 9   | NA  | RNA      | SNP               | 0.06 |      |
| D | 9 | Inferior Liver II    | HSP90AA4P 4  | 190396283 | C         | G        | 175 | 0   | NA  | RNA      | SNP               | 0.11 |      |
| G | 9 | RP Peri-aortic LN II | HSP90AA4P 4  | 190396283 | C         | G        | 173 | 0   | NA  | RNA      | SNP               | 0.06 |      |
| B | 9 | Hilar LN             | HTR3E        | 3         | 183819289 | T        | A   | 245 | 0   | p.L84H   | Missense_Mutation | SNP  | 0.06 |
| D | 9 | Inferior Liver II    | HTR3E        | 3         | 183819289 | T        | A   | 340 | 0   | p.L84H   | Missense_Mutation | SNP  | 0.11 |
| G | 9 | RP Peri-aortic LN II | HTR3E        | 3         | 183819289 | T        | A   | 177 | 59  | p.L84H   | Missense_Mutation | SNP  | 0.06 |
| B | 9 | Hilar LN             | ICAM3        | 19        | 10446404  | G        | T   | 377 | 31  | p.P198T  | Missense_Mutation | SNP  | 0.06 |
| D | 9 | Inferior Liver II    | ICAM3        | 19        | 10446404  | G        | T   | 573 | 0   | p.P198T  | Missense_Mutation | SNP  | 0.11 |
| G | 9 | RP Peri-aortic LN II | ICAM3        | 19        | 10446404  | G        | T   | 418 | 0   | p.P198T  | Missense_Mutation | SNP  | 0.06 |
| B | 9 | Hilar LN             | IGF2R        | 6         | 160461606 | G        | A   | 91  | 10  | p.G444R  | Missense_Mutation | SNP  | 0.06 |
| D | 9 | Inferior Liver II    | IGF2R        | 6         | 160461606 | G        | A   | 111 | 0   | p.G444R  | Missense_Mutation | SNP  | 0.11 |
| G | 9 | RP Peri-aortic LN II | IGF2R        | 6         | 160461606 | G        | A   | 108 | 0   | p.G444R  | Missense_Mutation | SNP  | 0.06 |
| B | 9 | Hilar LN             | IGHV1OR21 21 | 10863039  | T         | G        | 239 | 13  | NA  | RNA      | SNP               | 0.06 |      |
| D | 9 | Inferior Liver II    | IGHV1OR21 21 | 10863039  | T         | G        | 151 | 0   | NA  | RNA      | SNP               | 0.11 |      |
| G | 9 | RP Peri-aortic LN II | IGHV1OR21 21 | 10863039  | T         | G        | 172 | 0   | NA  | RNA      | SNP               | 0.06 |      |
| B | 9 | Hilar LN             | IL26         | 12        | 68619475  | G        | C   | 188 | 0   | p.A21G   | Missense_Mutation | SNP  | 0.06 |
| D | 9 | Inferior Liver II    | IL26         | 12        | 68619475  | G        | C   | 198 | 0   | p.A21G   | Missense_Mutation | SNP  | 0.11 |
| G | 9 | RP Peri-aortic LN II | IL26         | 12        | 68619475  | G        | C   | 119 | 35  | p.A21G   | Missense_Mutation | SNP  | 0.06 |
| B | 9 | Hilar LN             | IQGAP3       | 1         | 156534432 | C        | A   | 222 | 0   | p.V138L  | Missense_Mutation | SNP  | 0.06 |
| D | 9 | Inferior Liver II    | IQGAP3       | 1         | 156534432 | C        | A   | 403 | 0   | p.V138L  | Missense_Mutation | SNP  | 0.11 |
| G | 9 | RP Peri-aortic LN II | IQGAP3       | 1         | 156534432 | C        | A   | 264 | 62  | p.V138L  | Missense_Mutation | SNP  | 0.06 |
| B | 9 | Hilar LN             | ITGAL        | 16        | 30507880  | G        | T   | 122 | 0   | p.V609L  | Missense_Mutation | SNP  | 0.06 |
| D | 9 | Inferior Liver II    | ITGAL        | 16        | 30507880  | G        | T   | 183 | 0   | p.V609L  | Missense_Mutation | SNP  | 0.11 |
| G | 9 | RP Peri-aortic LN II | ITGAL        | 16        | 30507880  | G        | T   | 151 | 14  | p.V609L  | Missense_Mutation | SNP  | 0.06 |
| B | 9 | Hilar LN             | IVL          | 1         | 152883965 | A        | T   | 283 | 21  | p.E564D  | Missense_Mutation | SNP  | 0.06 |
| D | 9 | Inferior Liver II    | IVL          | 1         | 152883965 | A        | T   | 398 | 0   | p.E564D  | Missense_Mutation | SNP  | 0.11 |
| G | 9 | RP Peri-aortic LN II | IVL          | 1         | 152883965 | A        | T   | 340 | 0   | p.E564D  | Missense_Mutation | SNP  | 0.06 |
| B | 9 | Hilar LN             | JMJ.D7-PLA2  | 15        | 42127206  | C        | A   | 217 | 14  | p.T86N   | Missense_Mutation | SNP  | 0.06 |
| D | 9 | Inferior Liver II    | JMJ.D7-PLA2  | 15        | 42127206  | C        | A   | 289 | 0   | p.T86N   | Missense_Mutation | SNP  | 0.11 |
| G | 9 | RP Peri-aortic LN II | JMJ.D7-PLA2  | 15        | 42127206  | C        | A   | 187 | 0   | p.T86N   | Missense_Mutation | SNP  | 0.06 |
| B | 9 | Hilar LN             | KCNJ14       | 19        | 48965357  | C        | A   | 285 | 9   | p.P126T  | Missense_Mutation | SNP  | 0.06 |
| D | 9 | Inferior Liver II    | KCNJ14       | 19        | 48965357  | C        | A   | 300 | 0   | p.P126T  | Missense_Mutation | SNP  | 0.11 |
| G | 9 | RP Peri-aortic LN II | KCNJ14       | 19        | 48965357  | C        | A   | 303 | 0   | p.P126T  | Missense_Mutation | SNP  | 0.06 |
| B | 9 | Hilar LN             | KCNJ2        | 17        | 68172337  | A        | T   | 299 | 0   | p.E386V  | Missense_Mutation | SNP  | 0.06 |
| D | 9 | Inferior Liver II    | KCNJ2        | 17        | 68172337  | A        | T   | 151 | 113 | p.E386V  | Missense_Mutation | SNP  | 0.11 |
| G | 9 | RP Peri-aortic LN II | KCNJ2        | 17        | 68172337  | A        | T   | 225 | 0   | p.E386V  | Missense_Mutation | SNP  | 0.06 |
| B | 9 | Hilar LN             | KCTD9        | 8         | 25293776  | G        | A   | 222 | 0   | p.P213L  | Missense_Mutation | SNP  | 0.06 |
| D | 9 | Inferior Liver II    | KCTD9        | 8         | 25293776  | G        | A   | 171 | 27  | p.P213L  | Missense_Mutation | SNP  | 0.11 |
| G | 9 | RP Peri-aortic LN II | KCTD9        | 8         | 25293776  | G        | A   | 166 | 0   | p.P213L  | Missense_Mutation | SNP  | 0.06 |
| B | 9 | Hilar LN             | KDEL.R2      | 7         | 6502776   | G        | C   | 267 | 0   | p.A212G  | Missense_Mutation | SNP  | 0.06 |
| D | 9 | Inferior Liver II    | KDEL.R2      | 7         | 6502776   | G        | C   | 286 | 47  | p.A212G  | Missense_Mutation | SNP  | 0.11 |

|   |   |                                  |          |    |           |   |     |     |     |          |                   |     |      |
|---|---|----------------------------------|----------|----|-----------|---|-----|-----|-----|----------|-------------------|-----|------|
| G | 9 | RP Peri-aortic LN II             | KDEL2    | 7  | 6502776   | G | C   | 207 | 0   | p.A212G  | Missense_Mutation | SNP | 0.06 |
| B | 9 | Hilar LN                         | KIAA0391 | 14 | 35778081  | - | T   | 47  | 0   | NA       | Intron            | INS | 0.06 |
| D | 9 | Inferior Liver II                | KIAA0391 | 14 | 35778081  | - | T   | 58  | 0   | NA       | Intron            | INS | 0.11 |
| G | 9 | RP Peri-aortic LN II             | KIAA0391 | 14 | 35778081  | - | T   | 20  | 23  | NA       | Intron            | INS | 0.06 |
| B | 9 | Hilar LN                         | KIAA1683 | 19 | 18375264  | T | G   | 229 | 0   | p.K821T  | Missense_Mutation | SNP | 0.06 |
| D | 9 | Inferior Liver II                | KIAA1683 | 19 | 18375264  | T | G   | 246 | 0   | p.K821T  | Missense_Mutation | SNP | 0.11 |
| G | 9 | RP Peri-aortic LN II             | KIAA1683 | 19 | 18375264  | T | G   | 208 | 20  | p.K821T  | Missense_Mutation | SNP | 0.06 |
| B | 9 | Hilar LN                         | KLHDC7A  | 1  | 18808916  | G | A   | 228 | 17  | p.E481K  | Missense_Mutation | SNP | 0.06 |
| D | 9 | Inferior Liver II                | KLHDC7A  | 1  | 18808916  | G | A   | 249 | 0   | p.E481K  | Missense_Mutation | SNP | 0.11 |
| G | 9 | RP Peri-aortic LN II             | KLHDC7A  | 1  | 18808916  | G | A   | 181 | 0   | p.E481K  | Missense_Mutation | SNP | 0.06 |
| B | 9 | Hilar LN                         | KLHDC8B  | 3  | 49215155  | G | A   | 152 | 0   | NA       | IGR               | SNP | 0.06 |
| D | 9 | Inferior Liver II                | KLHDC8B  | 3  | 49215155  | G | A   | 86  | 53  | NA       | IGR               | SNP | 0.11 |
| G | 9 | RP Peri-aortic LN II             | KLHDC8B  | 3  | 49215155  | G | A   | 133 | 0   | NA       | IGR               | SNP | 0.06 |
| B | 9 | Hilar LN                         | KRT84    | 12 | 52777553  | G | A   | 196 | 0   | p.L192L  | Silent            | SNP | 0.06 |
| D | 9 | Inferior Liver II                | KRT84    | 12 | 52777553  | G | A   | 156 | 25  | p.L192L  | Silent            | SNP | 0.11 |
| G | 9 | RP Peri-aortic LN II             | KRT84    | 12 | 52777553  | G | A   | 188 | 0   | p.L192L  | Silent            | SNP | 0.06 |
| B | 9 | Hilar LN                         | LAMC3    | 9  | 133967084 | C | T   | 398 | 0   | p.F1546F | Silent            | SNP | 0.06 |
| D | 9 | Inferior Liver II                | LAMC3    | 9  | 133967084 | C | T   | 486 | 174 | p.F1546F | Silent            | SNP | 0.11 |
| G | 9 | RP Peri-aortic LN II             | LAMC3    | 9  | 133967084 | C | T   | 570 | 0   | p.F1546F | Silent            | SNP | 0.06 |
| B | 9 | Hilar LN                         | LEPR     | 1  | 66067065  | C | T   | 87  | 4   | NA       | Intron            | SNP | 0.06 |
| D | 9 | Inferior Liver II                | LEPR     | 1  | 66067065  | C | T   | 159 | 0   | NA       | Intron            | SNP | 0.11 |
| G | 9 | RP Peri-aortic LN II             | LEPR     | 1  | 66067065  | C | T   | 93  | 0   | NA       | Intron            | SNP | 0.06 |
| B | 9 | Hilar LN                         | LRP1     | 12 | 57595635  | G | C   | 228 | 18  | p.C3514S | Missense_Mutation | SNP | 0.06 |
| D | 9 | Inferior Liver II                | LRP1     | 12 | 57595635  | G | C   | 213 | 0   | p.C3514S | Missense_Mutation | SNP | 0.11 |
| G | 9 | RP Peri-aortic LN II             | LRP1     | 12 | 57595635  | G | C   | 317 | 0   | p.C3514S | Missense_Mutation | SNP | 0.06 |
| B | 9 | Hilar LN                         | LRRFIP1  | 2  | 238601128 | G | A   | 138 | 4   | NA       | Intron            | SNP | 0.06 |
| D | 9 | Inferior Liver II                | LRRFIP1  | 2  | 238601128 | G | A   | 174 | 0   | NA       | Intron            | SNP | 0.11 |
| G | 9 | RP Peri-aortic LN II             | LRRFIP1  | 2  | 238601128 | G | A   | 178 | 0   | NA       | Intron            | SNP | 0.06 |
| B | 9 | Hilar LN                         | MAST1    | 19 | 12976004  | G | T   | 99  | 7   | NA       | Intron            | SNP | 0.06 |
| D | 9 | Inferior Liver II                | MAST1    | 19 | 12976004  | G | T   | 124 | 0   | NA       | Intron            | SNP | 0.11 |
| G | 9 | RP Peri-aortic LN II             | MAST1    | 19 | 12976004  | G | T   | 86  | 0   | NA       | Intron            | SNP | 0.06 |
| B | 9 | Hilar LN                         | MFS12    | 19 | 3557163   | G | T   | 356 | 21  | p.A80D   | Missense_Mutation | SNP | 0.06 |
| D | 9 | Inferior Liver II                | MFS12    | 19 | 3557163   | G | T   | 485 | 0   | p.A80D   | Missense_Mutation | SNP | 0.11 |
| G | 9 | RP Peri-aortic LN II             | MFS12    | 19 | 3557163   | G | T   | 402 | 0   | p.A80D   | Missense_Mutation | SNP | 0.06 |
| B | 9 | Hilar LN                         | MROH5    | 8  | 142488855 | T | C   | 112 | 0   | NA       | RNA               | SNP | 0.06 |
| D | 9 | Inferior Liver II                | MROH5    | 8  | 142488855 | T | C   | 142 | 0   | NA       | RNA               | SNP | 0.11 |
| G | 9 | RP Peri-aortic LN II             | MROH5    | 8  | 142488855 | T | C   | 123 | 13  | NA       | RNA               | SNP | 0.06 |
| B | 9 | Hilar LN                         | MROH5    | 8  | 142500311 | C | A   | 178 | 0   | NA       | RNA               | SNP | 0.06 |
| D | 9 | Inferior Liver II                | MROH5    | 8  | 142500311 | C | A   | 226 | 0   | NA       | RNA               | SNP | 0.11 |
| G | 9 | RP Peri-aortic LN II             | MROH5    | 8  | 142500311 | C | A   | 197 | 47  | NA       | RNA               | SNP | 0.06 |
| B | 9 | Hilar LN                         | MUC22    | 6  | 30996805  | T | C   | 490 | 0   | p.S1199S | Silent            | SNP | 0.06 |
| D | 9 | Inferior Liver II                | MUC22    | 6  | 30996805  | T | C   | 611 | 0   | p.S1199S | Silent            | SNP | 0.11 |
| G | 9 | RP Peri-aortic LN II             | MUC22    | 6  | 30996805  | T | C   | 389 | 133 | p.S1199S | Silent            | SNP | 0.06 |
| B | 9 | Hilar LN                         | MUC6     | 11 | 1030700   | C | G   | 191 | 0   | p.Q255H  | Missense_Mutation | SNP | 0.06 |
| D | 9 | Inferior Liver II                | MUC6     | 11 | 1030700   | C | G   | 283 | 0   | p.Q255H  | Missense_Mutation | SNP | 0.11 |
| G | 9 | RP Peri-aortic LN II             | MUC6     | 11 | 1030700   | C | G   | 233 | 18  | p.Q255H  | Missense_Mutation | SNP | 0.06 |
| B | 9 | Hilar LN                         | MYH2     | 17 | 10438451  | C | T   | 362 | 0   | NA       | Intron            | SNP | 0.06 |
| D | 9 | Inferior Liver II                | MYH2     | 17 | 10438451  | C | T   | 311 | 0   | NA       | Intron            | SNP | 0.11 |
| G | 9 | RP Peri-aortic LN II             | MYH2     | 17 | 10438451  | C | T   | 162 | 104 | NA       | Intron            | SNP | 0.06 |
| I | 9 | Medial Temp. Lobe (White Matter) | MYH2     | 17 | 10438451  | C | T   | 257 | 3   | NA       | Intron            | SNP | 0.01 |
| B | 9 | Hilar LN                         | MYO16    | 13 | 109793652 | G | C   | 108 | 0   | p.A1676P | Missense_Mutation | SNP | 0.06 |
| D | 9 | Inferior Liver II                | MYO16    | 13 | 109793652 | G | C   | 100 | 52  | p.A1676P | Missense_Mutation | SNP | 0.11 |
| G | 9 | RP Peri-aortic LN II             | MYO16    | 13 | 109793652 | G | C   | 142 | 0   | p.A1676P | Missense_Mutation | SNP | 0.06 |
| B | 9 | Hilar LN                         | NASP     | 1  | 46083816  | G | T   | 270 | 0   | NA       | 3'UTR             | SNP | 0.06 |
| D | 9 | Inferior Liver II                | NASP     | 1  | 46083816  | G | T   | 310 | 0   | NA       | 3'UTR             | SNP | 0.11 |
| G | 9 | RP Peri-aortic LN II             | NASP     | 1  | 46083816  | G | T   | 427 | 17  | NA       | 3'UTR             | SNP | 0.06 |
| B | 9 | Hilar LN                         | NBEAL1   | 2  | 204022518 | C | A   | 34  | 0   | p.P1866H | Missense_Mutation | SNP | 0.06 |
| D | 9 | Inferior Liver II                | NBEAL1   | 2  | 204022518 | C | A   | 64  | 10  | p.P1866H | Missense_Mutation | SNP | 0.11 |
| G | 9 | RP Peri-aortic LN II             | NBEAL1   | 2  | 204022518 | C | A   | 59  | 0   | p.P1866H | Missense_Mutation | SNP | 0.06 |
| B | 9 | Hilar LN                         | NBEAL1   | 2  | 204022520 | G | A   | 36  | 0   | p.E1867K | Missense_Mutation | SNP | 0.06 |
| D | 9 | Inferior Liver II                | NBEAL1   | 2  | 204022520 | G | A   | 61  | 9   | p.E1867K | Missense_Mutation | SNP | 0.11 |
| G | 9 | RP Peri-aortic LN II             | NBEAL1   | 2  | 204022520 | G | A   | 56  | 0   | p.E1867K | Missense_Mutation | SNP | 0.06 |
| B | 9 | Hilar LN                         | NDUFA5   | 7  | 123182284 | C | A   | 91  | 12  | NA       | Intron            | SNP | 0.06 |
| D | 9 | Inferior Liver II                | NDUFA5   | 7  | 123182284 | C | A   | 136 | 0   | NA       | Intron            | SNP | 0.11 |
| G | 9 | RP Peri-aortic LN II             | NDUFA5   | 7  | 123182284 | C | A   | 92  | 0   | NA       | Intron            | SNP | 0.06 |
| B | 9 | Hilar LN                         | NFIC     | 19 | 3381925   | G | A   | 533 | 13  | p.K82K   | Silent            | SNP | 0.06 |
| D | 9 | Inferior Liver II                | NFIC     | 19 | 3381925   | G | A   | 667 | 0   | p.K82K   | Silent            | SNP | 0.11 |
| G | 9 | RP Peri-aortic LN II             | NFIC     | 19 | 3381925   | G | A   | 566 | 0   | p.K82K   | Silent            | SNP | 0.06 |
| B | 9 | Hilar LN                         | NPR2     | 9  | 35811373  | - | ATC | 366 | 0   | NA       | IGR               | INS | 0.06 |
| D | 9 | Inferior Liver II                | NPR2     | 9  | 35811373  | - | ATC | 510 | 115 | NA       | IGR               | INS | 0.11 |
| G | 9 | RP Peri-aortic LN II             | NPR2     | 9  | 35811373  | - | ATC | 461 | 0   | NA       | IGR               | INS | 0.06 |
| B | 9 | Hilar LN                         | NR2F2    | 15 | 96880729  | T | A   | 341 | 0   | p.S375T  | Missense_Mutation | SNP | 0.06 |
| D | 9 | Inferior Liver II                | NR2F2    | 15 | 96880729  | T | A   | 375 | 0   | p.S375T  | Missense_Mutation | SNP | 0.11 |
| G | 9 | RP Peri-aortic LN II             | NR2F2    | 15 | 96880729  | T | A   | 256 | 26  | p.S375T  | Missense_Mutation | SNP | 0.06 |
| B | 9 | Hilar LN                         | NUPR1L   | 7  | 56183967  | G | A   | 145 | 0   | p.A14V   | Missense_Mutation | SNP | 0.06 |
| D | 9 | Inferior Liver II                | NUPR1L   | 7  | 56183967  | G | A   | 137 | 73  | p.A14V   | Missense_Mutation | SNP | 0.11 |
| G | 9 | RP Peri-aortic LN II             | NUPR1L   | 7  | 56183967  | G | A   | 128 | 0   | p.A14V   | Missense_Mutation | SNP | 0.06 |
| B | 9 | Hilar LN                         | OBSCN    | 1  | 228504496 | G | T   | 203 | 15  | p.A4458S | Missense_Mutation | SNP | 0.06 |
| D | 9 | Inferior Liver II                | OBSCN    | 1  | 228504496 | G | T   | 283 | 1   | p.A4458S | Missense_Mutation | SNP | 0.11 |
| G | 9 | RP Peri-aortic LN II             | OBSCN    | 1  | 228504496 | G | T   | 276 | 0   | p.A4458S | Missense_Mutation | SNP | 0.06 |
| B | 9 | Hilar LN                         | OC90     | 8  | 133049719 | G | A   | 268 | 0   | p.P215P  | Silent            | SNP | 0.06 |
| D | 9 | Inferior Liver II                | OC90     | 8  | 133049719 | G | A   | 206 | 116 | p.P215P  | Silent            | SNP | 0.11 |
| G | 9 | RP Peri-aortic LN II             | OC90     | 8  | 133049719 | G | A   | 316 | 0   | p.P215P  | Silent            | SNP | 0.06 |
| B | 9 | Hilar LN                         | OR2B6    | 6  | 27925566  | C | A   | 114 | 7   | p.A183E  | Missense_Mutation | SNP | 0.06 |
| D | 9 | Inferior Liver II                | OR2B6    | 6  | 27925566  | C | A   | 121 | 0   | p.A183E  | Missense_Mutation | SNP | 0.11 |
| G | 9 | RP Peri-aortic LN II             | OR2B6    | 6  | 27925566  | C | A   | 102 | 0   | p.A183E  | Missense_Mutation | SNP | 0.06 |
| B | 9 | Hilar LN                         | OR51F2   | 11 | 4843218   | C | T   | 121 | 6   | p.L201L  | Silent            | SNP | 0.06 |
| D | 9 | Inferior Liver II                | OR51F2   | 11 | 4843218   | C | T   | 223 | 0   | p.L201L  | Silent            | SNP | 0.11 |
| G | 9 | RP Peri-aortic LN II             | OR51F2   | 11 | 4843218   | C | T   | 175 | 0   | p.L201L  | Silent            | SNP | 0.06 |
| B | 9 | Hilar LN                         | OR5A2    | 11 | 59189861  | G | T   | 202 | 0   | p.S189Y  | Missense_Mutation | SNP | 0.06 |
| D | 9 | Inferior Liver II                | OR5A2    | 11 | 59189861  | G | T   | 240 | 0   | p.S189Y  | Missense_Mutation | SNP | 0.11 |
| G | 9 | RP Peri-aortic LN II             | OR5A2    | 11 | 59189861  | G | T   | 179 | 29  | p.S189Y  | Missense_Mutation | SNP | 0.06 |
| B | 9 | Hilar LN                         | OSBPL9   | 1  | 52253148  | G | C   | 185 | 0   | p.Q708H  | Missense_Mutation | SNP | 0.06 |
| D | 9 | Inferior Liver II                | OSBPL9   | 1  | 52253148  | G | C   | 125 | 49  | p.Q708H  | Missense_Mutation | SNP | 0.11 |
| G | 9 | RP Peri-aortic LN II             | OSBPL9   | 1  | 52253148  | G | C   | 225 | 0   | p.Q708H  | Missense_Mutation | SNP | 0.06 |
| B | 9 | Hilar LN                         | OTUD7B   | 1  | 149908053 | G | C   | 356 | 9   | NA       | IGR               | SNP | 0.06 |
| D | 9 | Inferior Liver II                | OTUD7B   | 1  | 149908053 | G | C   | 603 | 0   | NA       | IGR               | SNP | 0.11 |
| G | 9 | RP Peri-aortic LN II             | OTUD7B   | 1  | 149908053 | G | C   | 452 | 0   | NA       | IGR               | SNP | 0.06 |
| B | 9 | Hilar LN                         | PANK4    | 1  | 2444346   | C | T   | 279 | 18  | p.G570R  | Missense_Mutation | SNP | 0.06 |
| D | 9 | Inferior Liver II                | PANK4    | 1  | 2444346   | C | T   | 222 | 0   | p.G570R  | Missense_Mutation | SNP | 0.11 |
| G | 9 | RP Peri-aortic LN II             | PANK4    | 1  | 2444346   | C | T   | 350 | 0   | p.G570R  | Missense_Mutation | SNP | 0.06 |
| B | 9 | Hilar LN                         | PAPPA    | 9  | 118997496 | T | A   | 372 | 0   | p.V771D  | Missense_Mutation | SNP | 0.06 |
| D | 9 | Inferior Liver II                | PAPPA    | 9  | 118997496 | T | A   | 560 | 0   | p.V771D  | Missense_Mutation | SNP | 0.11 |
| G | 9 | RP Peri-aortic LN II             | PAPPA    | 9  | 118997496 | T | A   | 430 | 25  | p.V771D  | Missense_Mutation | SNP | 0.06 |
| B | 9 | Hilar LN                         | PCDHB15  | 5  | 140627056 | A | G   | 617 | 60  | p.K637R  | Missense_Mutation | SNP | 0.06 |
| D | 9 | Inferior Liver II                | PCDHB15  | 5  | 140627056 | A | G   | 591 | 0   | p.K637R  | Missense_Mutation | SNP | 0.11 |

|   |   |                      |             |          |           |      |     |     |     |           |                   |      |      |
|---|---|----------------------|-------------|----------|-----------|------|-----|-----|-----|-----------|-------------------|------|------|
| G | 9 | RP Peri-aortic LN II | PCDHB15     | 5        | 140627056 | A    | G   | 569 | 0   | p.K637R   | Missense_Mutation | SNP  | 0.06 |
| B | 9 | Hilar LN             | PGK2        | 6        | 49753952  | C    | A   | 297 | 0   | p.G317C   | Missense_Mutation | SNP  | 0.06 |
| D | 9 | Inferior Liver II    | PGK2        | 6        | 49753952  | C    | A   | 380 | 0   | p.G317C   | Missense_Mutation | SNP  | 0.11 |
| G | 9 | RP Peri-aortic LN II | PGK2        | 6        | 49753952  | C    | A   | 244 | 28  | p.G317C   | Missense_Mutation | SNP  | 0.06 |
| B | 9 | Hilar LN             | PHTF2       | 7        | 77552015  | C    | T   | 110 | 0   | p.R347C   | Missense_Mutation | SNP  | 0.06 |
| D | 9 | Inferior Liver II    | PHTF2       | 7        | 77552015  | C    | T   | 169 | 0   | p.R347C   | Missense_Mutation | SNP  | 0.11 |
| G | 9 | RP Peri-aortic LN II | PHTF2       | 7        | 77552015  | C    | T   | 72  | 24  | p.R347C   | Missense_Mutation | SNP  | 0.06 |
| B | 9 | Hilar LN             | PIEZO2      | 18       | 10748489  | A    | T   | 214 | 13  | p.A1443A  | Silent            | SNP  | 0.06 |
| D | 9 | Inferior Liver II    | PIEZO2      | 18       | 10748489  | A    | T   | 308 | 0   | p.A1443A  | Silent            | SNP  | 0.11 |
| G | 9 | RP Peri-aortic LN II | PIEZO2      | 18       | 10748489  | A    | T   | 236 | 0   | p.A1443A  | Silent            | SNP  | 0.06 |
| B | 9 | Hilar LN             | PIK3C2G     | 12       | 18491451  | AACT | -   | 59  | 0   | p.EL455fs | Frame_Shift_Del   | DEL  | 0.06 |
| D | 9 | Inferior Liver II    | PIK3C2G     | 12       | 18491451  | AACT | -   | 75  | 36  | p.EL455fs | Frame_Shift_Del   | DEL  | 0.11 |
| G | 9 | RP Peri-aortic LN II | PIK3C2G     | 12       | 18491451  | AACT | -   | 89  | 0   | p.EL455fs | Frame_Shift_Del   | DEL  | 0.06 |
| B | 9 | Hilar LN             | PIK3C3      | 18       | 39575963  | G    | C   | 132 | 6   | NA        | Intron            | SNP  | 0.06 |
| D | 9 | Inferior Liver II    | PIK3C3      | 18       | 39575963  | G    | C   | 175 | 0   | NA        | Intron            | SNP  | 0.11 |
| G | 9 | RP Peri-aortic LN II | PIK3C3      | 18       | 39575963  | G    | C   | 113 | 0   | NA        | Intron            | SNP  | 0.06 |
| B | 9 | Hilar LN             | PKDREJ      | 22       | 46656158  | G    | A   | 237 | 0   | p.P1021L  | Missense_Mutation | SNP  | 0.06 |
| D | 9 | Inferior Liver II    | PKDREJ      | 22       | 46656158  | G    | A   | 209 | 0   | p.P1021L  | Missense_Mutation | SNP  | 0.11 |
| G | 9 | RP Peri-aortic LN II | PKDREJ      | 22       | 46656158  | G    | A   | 169 | 86  | p.P1021L  | Missense_Mutation | SNP  | 0.06 |
| B | 9 | Hilar LN             | PLCB2       | 15       | 40581081  | C    | T   | 155 | 0   | p.M1131I  | Missense_Mutation | SNP  | 0.06 |
| D | 9 | Inferior Liver II    | PLCB2       | 15       | 40581081  | C    | T   | 150 | 0   | p.M1131I  | Missense_Mutation | SNP  | 0.11 |
| G | 9 | RP Peri-aortic LN II | PLCB2       | 15       | 40581081  | C    | T   | 122 | 17  | p.M1131I  | Missense_Mutation | SNP  | 0.06 |
| B | 9 | Hilar LN             | PLEKHG7     | 12       | 93135320  | C    | G   | 113 | 6   | p.D51E    | Missense_Mutation | SNP  | 0.06 |
| D | 9 | Inferior Liver II    | PLEKHG7     | 12       | 93135320  | C    | G   | 186 | 0   | p.D51E    | Missense_Mutation | SNP  | 0.11 |
| G | 9 | RP Peri-aortic LN II | PLEKHG7     | 12       | 93135320  | C    | G   | 122 | 0   | p.D51E    | Missense_Mutation | SNP  | 0.06 |
| B | 9 | Hilar LN             | PPARG       | 3        | 12458229  | C    | T   | 144 | 0   | NA        | Intron            | SNP  | 0.06 |
| D | 9 | Inferior Liver II    | PPARG       | 3        | 12458229  | C    | T   | 110 | 45  | NA        | Intron            | SNP  | 0.11 |
| G | 9 | RP Peri-aortic LN II | PPARG       | 3        | 12458229  | C    | T   | 130 | 0   | NA        | Intron            | SNP  | 0.06 |
| B | 9 | Hilar LN             | PRCC        | 1        | 156770260 | G    | C   | 175 | 0   | NA        | 3'UTR             | SNP  | 0.06 |
| D | 9 | Inferior Liver II    | PRCC        | 1        | 156770260 | G    | C   | 207 | 20  | NA        | 3'UTR             | SNP  | 0.11 |
| G | 9 | RP Peri-aortic LN II | PRCC        | 1        | 156770260 | G    | C   | 226 | 0   | NA        | 3'UTR             | SNP  | 0.06 |
| B | 9 | Hilar LN             | PREX2       | 8        | 68864803  | C    | T   | 302 | 0   | NA        | Intron            | SNP  | 0.06 |
| D | 9 | Inferior Liver II    | PREX2       | 8        | 68864803  | C    | T   | 427 | 0   | NA        | Intron            | SNP  | 0.11 |
| G | 9 | RP Peri-aortic LN II | PREX2       | 8        | 68864803  | C    | T   | 307 | 31  | NA        | Intron            | SNP  | 0.06 |
| B | 9 | Hilar LN             | PROKR1      | 2        | 68882255  | C    | A   | 374 | 0   | p.G243G   | Silent            | SNP  | 0.06 |
| D | 9 | Inferior Liver II    | PROKR1      | 2        | 68882255  | C    | A   | 261 | 135 | p.G243G   | Silent            | SNP  | 0.11 |
| G | 9 | RP Peri-aortic LN II | PROKR1      | 2        | 68882255  | C    | A   | 369 | 0   | p.G243G   | Silent            | SNP  | 0.06 |
| B | 9 | Hilar LN             | RAB11FIP1   | 8        | 37729004  | C    | G   | 98  | 0   | NA        | Intron            | SNP  | 0.06 |
| D | 9 | Inferior Liver II    | RAB11FIP1   | 8        | 37729004  | C    | G   | 168 | 0   | NA        | Intron            | SNP  | 0.11 |
| G | 9 | RP Peri-aortic LN II | RAB11FIP1   | 8        | 37729004  | C    | G   | 122 | 12  | NA        | Intron            | SNP  | 0.06 |
| B | 9 | Hilar LN             | RAB18       | 10       | 27827562  | A    | T   | 129 | 0   | NA        | 3'UTR             | SNP  | 0.06 |
| D | 9 | Inferior Liver II    | RAB18       | 10       | 27827562  | A    | T   | 250 | 15  | NA        | 3'UTR             | SNP  | 0.11 |
| G | 9 | RP Peri-aortic LN II | RAB18       | 10       | 27827562  | A    | T   | 93  | 0   | NA        | 3'UTR             | SNP  | 0.06 |
| B | 9 | Hilar LN             | RAD21       | 8        | 117866585 | C    | G   | 194 | 15  | p.A354P   | Missense_Mutation | SNP  | 0.06 |
| D | 9 | Inferior Liver II    | RAD21       | 8        | 117866585 | C    | G   | 341 | 0   | p.A354P   | Missense_Mutation | SNP  | 0.11 |
| G | 9 | RP Peri-aortic LN II | RAD21       | 8        | 117866585 | C    | G   | 184 | 0   | p.A354P   | Missense_Mutation | SNP  | 0.06 |
| B | 9 | Hilar LN             | RAF1        | 3        | 12660188  | G    | C   | 374 | 0   | p.I11M    | Missense_Mutation | SNP  | 0.06 |
| D | 9 | Inferior Liver II    | RAF1        | 3        | 12660188  | G    | C   | 243 | 94  | p.I11M    | Missense_Mutation | SNP  | 0.11 |
| G | 9 | RP Peri-aortic LN II | RAF1        | 3        | 12660188  | G    | C   | 343 | 0   | p.I11M    | Missense_Mutation | SNP  | 0.06 |
| B | 9 | Hilar LN             | RBPJ        | 4        | 26422258  | A    | C   | 97  | 6   | p.N149T   | Missense_Mutation | SNP  | 0.06 |
| D | 9 | Inferior Liver II    | RBPJ        | 4        | 26422258  | A    | C   | 110 | 0   | p.N149T   | Missense_Mutation | SNP  | 0.11 |
| G | 9 | RP Peri-aortic LN II | RBPJ        | 4        | 26422258  | A    | C   | 91  | 0   | p.N149T   | Missense_Mutation | SNP  | 0.06 |
| B | 9 | Hilar LN             | RGL4        | 22       | 24036583  | CT   | -   | 255 | 0   | p.A321fs  | Frame_Shift_Del   | DEL  | 0.06 |
| D | 9 | Inferior Liver II    | RGL4        | 22       | 24036583  | CT   | -   | 163 | 52  | p.A321fs  | Frame_Shift_Del   | DEL  | 0.11 |
| G | 9 | RP Peri-aortic LN II | RGL4        | 22       | 24036583  | CT   | -   | 216 | 0   | p.A321fs  | Frame_Shift_Del   | DEL  | 0.06 |
| B | 9 | Hilar LN             | RNF40       | 16       | 30783503  | G    | A   | 277 | 0   | p.E941K   | Missense_Mutation | SNP  | 0.06 |
| D | 9 | Inferior Liver II    | RNF40       | 16       | 30783503  | G    | A   | 222 | 106 | p.E941K   | Missense_Mutation | SNP  | 0.11 |
| G | 9 | RP Peri-aortic LN II | RNF40       | 16       | 30783503  | G    | A   | 372 | 0   | p.E941K   | Missense_Mutation | SNP  | 0.06 |
| B | 9 | Hilar LN             | RP11-287D12 | 74592674 | C         | T    | 551 | 0   | NA  | 5'Flank   | SNP               | 0.06 |      |
| D | 9 | Inferior Liver II    | RP11-287D12 | 74592674 | C         | T    | 517 | 0   | NA  | 5'Flank   | SNP               | 0.11 |      |
| G | 9 | RP Peri-aortic LN II | RP11-287D12 | 74592674 | C         | T    | 474 | 30  | NA  | 5'Flank   | SNP               | 0.06 |      |
| B | 9 | Hilar LN             | RPS10       | 6        | 34385275  | C    | T   | 339 | 0   | NA        | 3'UTR             | SNP  | 0.06 |
| D | 9 | Inferior Liver II    | RPS10       | 6        | 34385275  | C    | T   | 394 | 32  | NA        | 3'UTR             | SNP  | 0.11 |
| G | 9 | RP Peri-aortic LN II | RPS10       | 6        | 34385275  | C    | T   | 350 | 0   | NA        | 3'UTR             | SNP  | 0.06 |
| B | 9 | Hilar LN             | RSPH4A      | 6        | 116949368 | C    | G   | 114 | 6   | p.L500V   | Missense_Mutation | SNP  | 0.06 |
| D | 9 | Inferior Liver II    | RSPH4A      | 6        | 116949368 | C    | G   | 159 | 0   | p.L500V   | Missense_Mutation | SNP  | 0.11 |
| G | 9 | RP Peri-aortic LN II | RSPH4A      | 6        | 116949368 | C    | G   | 110 | 0   | p.L500V   | Missense_Mutation | SNP  | 0.06 |
| B | 9 | Hilar LN             | RYR1        | 19       | 39051978  | C    | A   | 354 | 0   | p.L4170I  | Missense_Mutation | SNP  | 0.06 |
| D | 9 | Inferior Liver II    | RYR1        | 19       | 39051978  | C    | A   | 296 | 84  | p.L4170I  | Missense_Mutation | SNP  | 0.11 |
| G | 9 | RP Peri-aortic LN II | RYR1        | 19       | 39051978  | C    | A   | 365 | 0   | p.L4170I  | Missense_Mutation | SNP  | 0.06 |
| B | 9 | Hilar LN             | RYR1        | 19       | 39051979  | T    | C   | 355 | 0   | p.L4170P  | Missense_Mutation | SNP  | 0.06 |
| D | 9 | Inferior Liver II    | RYR1        | 19       | 39051979  | T    | C   | 289 | 86  | p.L4170P  | Missense_Mutation | SNP  | 0.11 |
| G | 9 | RP Peri-aortic LN II | RYR1        | 19       | 39051979  | T    | C   | 365 | 0   | p.L4170P  | Missense_Mutation | SNP  | 0.06 |
| B | 9 | Hilar LN             | SECISBP2    | 9        | 91961851  | G    | T   | 549 | 1   | p.R497L   | Missense_Mutation | SNP  | 0.06 |
| D | 9 | Inferior Liver II    | SECISBP2    | 9        | 91961851  | G    | T   | 682 | 0   | p.R497L   | Missense_Mutation | SNP  | 0.11 |
| G | 9 | RP Peri-aortic LN II | SECISBP2    | 9        | 91961851  | G    | T   | 542 | 112 | p.R497L   | Missense_Mutation | SNP  | 0.06 |
| B | 9 | Hilar LN             | SERPINB4    | 18       | 61306503  | C    | A   | 114 | 0   | p.Q228H   | Missense_Mutation | SNP  | 0.06 |
| D | 9 | Inferior Liver II    | SERPINB4    | 18       | 61306503  | C    | A   | 82  | 30  | p.Q228H   | Missense_Mutation | SNP  | 0.11 |
| G | 9 | RP Peri-aortic LN II | SERPINB4    | 18       | 61306503  | C    | A   | 69  | 0   | p.Q228H   | Missense_Mutation | SNP  | 0.06 |
| B | 9 | Hilar LN             | SH2D5       | 1        | 21050692  | G    | A   | 235 | 0   | p.P228L   | Missense_Mutation | SNP  | 0.06 |
| D | 9 | Inferior Liver II    | SH2D5       | 1        | 21050692  | G    | A   | 217 | 0   | p.P228L   | Missense_Mutation | SNP  | 0.11 |
| G | 9 | RP Peri-aortic LN II | SH2D5       | 1        | 21050692  | G    | A   | 95  | 81  | p.P228L   | Missense_Mutation | SNP  | 0.06 |
| B | 9 | Hilar LN             | SHCBP1      | 16       | 46615754  | G    | T   | 343 | 0   | p.L636M   | Missense_Mutation | SNP  | 0.06 |
| D | 9 | Inferior Liver II    | SHCBP1      | 16       | 46615754  | G    | T   | 290 | 78  | p.L636M   | Missense_Mutation | SNP  | 0.11 |
| G | 9 | RP Peri-aortic LN II | SHCBP1      | 16       | 46615754  | G    | T   | 295 | 0   | p.L636M   | Missense_Mutation | SNP  | 0.06 |
| B | 9 | Hilar LN             | SLC18A2     | 10       | 119015018 | C    | T   | 355 | 0   | p.S273S   | Silent            | SNP  | 0.06 |
| D | 9 | Inferior Liver II    | SLC18A2     | 10       | 119015018 | C    | T   | 390 | 0   | p.S273S   | Silent            | SNP  | 0.11 |
| G | 9 | RP Peri-aortic LN II | SLC18A2     | 10       | 119015018 | C    | T   | 254 | 77  | p.S273S   | Silent            | SNP  | 0.06 |
| B | 9 | Hilar LN             | SLC38A3     | 3        | 50257581  | G    | A   | 253 | 7   | NA        | RNA               | SNP  | 0.06 |
| D | 9 | Inferior Liver II    | SLC38A3     | 3        | 50257581  | G    | A   | 264 | 0   | NA        | RNA               | SNP  | 0.11 |
| G | 9 | RP Peri-aortic LN II | SLC38A3     | 3        | 50257581  | G    | A   | 218 | 0   | NA        | RNA               | SNP  | 0.06 |
| B | 9 | Hilar LN             | SPATA31D1   | 9        | 84605829  | C    | T   | 481 | 39  | p.S148S   | Silent            | SNP  | 0.06 |
| D | 9 | Inferior Liver II    | SPATA31D1   | 9        | 84605829  | C    | T   | 638 | 0   | p.S148S   | Silent            | SNP  | 0.11 |
| G | 9 | RP Peri-aortic LN II | SPATA31D1   | 9        | 84605829  | C    | T   | 594 | 0   | p.S148S   | Silent            | SNP  | 0.06 |
| B | 9 | Hilar LN             | SRCAP       | 16       | 30735722  | A    | C   | 447 | 0   | p.S1659S  | Silent            | SNP  | 0.06 |
| D | 9 | Inferior Liver II    | SRCAP       | 16       | 30735722  | A    | C   | 403 | 121 | p.S1659S  | Silent            | SNP  | 0.11 |
| G | 9 | RP Peri-aortic LN II | SRCAP       | 16       | 30735722  | A    | C   | 545 | 0   | p.S1659S  | Silent            | SNP  | 0.06 |
| B | 9 | Hilar LN             | SRSF9       | 12       | 120903470 | C    | T   | 183 | 0   | p.G103G   | Silent            | SNP  | 0.06 |
| D | 9 | Inferior Liver II    | SRSF9       | 12       | 120903470 | C    | T   | 261 | 0   | p.G103G   | Silent            | SNP  | 0.11 |
| G | 9 | RP Peri-aortic LN II | SRSF9       | 12       | 120903470 | C    | T   | 165 | 48  | p.G103G   | Silent            | SNP  | 0.06 |
| B | 9 | Hilar LN             | STXBP2      | 19       | 7707672   | G    | A   | 341 | 0   | p.R308K   | Missense_Mutation | SNP  | 0.06 |
| D | 9 | Inferior Liver II    | STXBP2      | 19       | 7707672   | G    | A   | 270 | 93  | p.R308K   | Missense_Mutation | SNP  | 0.11 |
| G | 9 | RP Peri-aortic LN II | STXBP2      | 19       | 7707672   | G    | A   | 293 | 0   | p.R308K   | Missense_Mutation | SNP  | 0.06 |
| B | 9 | Hilar LN             | SYNE2       | 14       | 64632018  | T    | C   | 129 | 0   | NA        | Intron            | SNP  | 0.06 |
| D | 9 | Inferior Liver II    | SYNE2       | 14       | 64632018  | T    | C   | 160 | 22  | NA        | Intron            | SNP  | 0.11 |
| G | 9 | RP Peri-aortic LN II | SYNE2       | 14       | 64632018  | T    | C   | 128 | 0   | NA        | Intron            | SNP  | 0.06 |



|   |   |                         |         |    |           |   |      |     |     |          |                   |     |      |
|---|---|-------------------------|---------|----|-----------|---|------|-----|-----|----------|-------------------|-----|------|
| B | 9 | Hilar LN                | TBATA   | 10 | 72534089  | A | G    | 128 | 0   | p.L266P  | Missense_Mutation | SNP | 0.06 |
| D | 9 | Inferior Liver II       | TBATA   | 10 | 72534089  | A | G    | 138 | 48  | p.L266P  | Missense_Mutation | SNP | 0.11 |
| G | 9 | RP Peri-aortic LN II    | TBATA   | 10 | 72534089  | A | G    | 179 | 0   | p.L266P  | Missense_Mutation | SNP | 0.06 |
| B | 9 | Hilar LN                | TBATA   | 10 | 72534090  | G | T    | 123 | 0   | p.L266M  | Missense_Mutation | SNP | 0.06 |
| D | 9 | Inferior Liver II       | TBATA   | 10 | 72534090  | G | T    | 137 | 48  | p.L266M  | Missense_Mutation | SNP | 0.11 |
| G | 9 | RP Peri-aortic LN II    | TBATA   | 10 | 72534090  | G | T    | 176 | 0   | p.L266M  | Missense_Mutation | SNP | 0.06 |
| B | 9 | Hilar LN                | TCHH    | 1  | 152083488 | C | T    | 228 | 14  | p.Q735Q  | Silent            | SNP | 0.06 |
| D | 9 | Inferior Liver II       | TCHH    | 1  | 152083488 | C | T    | 451 | 0   | p.Q735Q  | Silent            | SNP | 0.11 |
| G | 9 | RP Peri-aortic LN II    | TCHH    | 1  | 152083488 | C | T    | 304 | 0   | p.Q735Q  | Silent            | SNP | 0.06 |
| B | 9 | Hilar LN                | TCP11   | 6  | 35088076  | G | A    | 145 | 0   | p.S325S  | Silent            | SNP | 0.06 |
| D | 9 | Inferior Liver II       | TCP11   | 6  | 35088076  | G | A    | 190 | 0   | p.S325S  | Silent            | SNP | 0.11 |
| G | 9 | RP Peri-aortic LN II    | TCP11   | 6  | 35088076  | G | A    | 105 | 47  | p.S325S  | Silent            | SNP | 0.06 |
| B | 9 | Hilar LN                | THADA   | 2  | 43801807  | C | T    | 138 | 0   | p.G466E  | Missense_Mutation | SNP | 0.06 |
| D | 9 | Inferior Liver II       | THADA   | 2  | 43801807  | C | T    | 156 | 13  | p.G466E  | Missense_Mutation | SNP | 0.11 |
| G | 9 | RP Peri-aortic LN II    | THADA   | 2  | 43801807  | C | T    | 92  | 0   | p.G466E  | Missense_Mutation | SNP | 0.06 |
| B | 9 | Hilar LN                | THSD7B  | 2  | 138000124 | C | T    | 211 | 0   | p.P750S  | Missense_Mutation | SNP | 0.06 |
| D | 9 | Inferior Liver II       | THSD7B  | 2  | 138000124 | C | T    | 280 | 0   | p.P750S  | Missense_Mutation | SNP | 0.11 |
| G | 9 | RP Peri-aortic LN II    | THSD7B  | 2  | 138000124 | C | T    | 235 | 14  | p.P750S  | Missense_Mutation | SNP | 0.06 |
| B | 9 | Hilar LN                | TMA7    | 3  | 48481983  | G | T    | 196 | 0   | p.E35D   | Missense_Mutation | SNP | 0.06 |
| D | 9 | Inferior Liver II       | TMA7    | 3  | 48481983  | G | T    | 232 | 0   | p.E35D   | Missense_Mutation | SNP | 0.11 |
| G | 9 | RP Peri-aortic LN II    | TMA7    | 3  | 48481983  | G | T    | 168 | 17  | p.E35D   | Missense_Mutation | SNP | 0.06 |
| B | 9 | Hilar LN                | TMEM214 | 2  | 27259641  | G | C    | 274 | 0   | p.D299H  | Missense_Mutation | SNP | 0.06 |
| D | 9 | Inferior Liver II       | TMEM214 | 2  | 27259641  | G | C    | 284 | 30  | p.D299H  | Missense_Mutation | SNP | 0.11 |
| G | 9 | RP Peri-aortic LN II    | TMEM214 | 2  | 27259641  | G | C    | 298 | 0   | p.D299H  | Missense_Mutation | SNP | 0.06 |
| B | 9 | Hilar LN                | TOM1L1  | 17 | 53014469  | G | A    | 168 | 0   | NA       | Splice_Site       | SNP | 0.06 |
| D | 9 | Inferior Liver II       | TOM1L1  | 17 | 53014469  | G | A    | 117 | 27  | NA       | Splice_Site       | SNP | 0.11 |
| G | 9 | RP Peri-aortic LN II    | TOM1L1  | 17 | 53014469  | G | A    | 117 | 0   | NA       | Splice_Site       | SNP | 0.06 |
| B | 9 | Hilar LN                | TPTE    | 21 | 10920100  | A | G    | 152 | 16  | p.V385A  | Missense_Mutation | SNP | 0.06 |
| D | 9 | Inferior Liver II       | TPTE    | 21 | 10920100  | A | G    | 146 | 0   | p.V385A  | Missense_Mutation | SNP | 0.11 |
| E | 9 | Chest Wall Subcutaneous | TPTE    | 21 | 10920100  | A | G    | 230 | 4   | p.V385A  | Missense_Mutation | SNP | 0.01 |
| G | 9 | RP Peri-aortic LN II    | TPTE    | 21 | 10920100  | A | G    | 101 | 0   | p.V385A  | Missense_Mutation | SNP | 0.06 |
| B | 9 | Hilar LN                | TRAV17  | 14 | 22465978  | T | G    | 71  | 5   | NA       | RNA               | SNP | 0.06 |
| D | 9 | Inferior Liver II       | TRAV17  | 14 | 22465978  | T | G    | 80  | 0   | NA       | RNA               | SNP | 0.11 |
| G | 9 | RP Peri-aortic LN II    | TRAV17  | 14 | 22465978  | T | G    | 75  | 0   | NA       | RNA               | SNP | 0.06 |
| B | 9 | Hilar LN                | TRAV17  | 14 | 22465979  | G | T    | 74  | 7   | NA       | RNA               | SNP | 0.06 |
| D | 9 | Inferior Liver II       | TRAV17  | 14 | 22465979  | G | T    | 79  | 0   | NA       | RNA               | SNP | 0.11 |
| G | 9 | RP Peri-aortic LN II    | TRAV17  | 14 | 22465979  | G | T    | 79  | 0   | NA       | RNA               | SNP | 0.06 |
| B | 9 | Hilar LN                | TSC1    | 9  | 135779128 | A | G    | 370 | 29  | p.R706R  | Silent            | SNP | 0.06 |
| D | 9 | Inferior Liver II       | TSC1    | 9  | 135779128 | A | G    | 571 | 0   | p.R706R  | Silent            | SNP | 0.11 |
| G | 9 | RP Peri-aortic LN II    | TSC1    | 9  | 135779128 | A | G    | 551 | 0   | p.R706R  | Silent            | SNP | 0.06 |
| B | 9 | Hilar LN                | TTC31   | 2  | 74717590  | T | A    | 91  | 0   | p.V151E  | Missense_Mutation | SNP | 0.06 |
| D | 9 | Inferior Liver II       | TTC31   | 2  | 74717590  | T | A    | 133 | 0   | p.V151E  | Missense_Mutation | SNP | 0.11 |
| G | 9 | RP Peri-aortic LN II    | TTC31   | 2  | 74717590  | T | A    | 76  | 34  | p.V151E  | Missense_Mutation | SNP | 0.06 |
| B | 9 | Hilar LN                | UBAC1   | 9  | 138831581 | C | T    | 44  | 0   | p.G301R  | Missense_Mutation | SNP | 0.06 |
| D | 9 | Inferior Liver II       | UBAC1   | 9  | 138831581 | C | T    | 69  | 0   | p.G301R  | Missense_Mutation | SNP | 0.11 |
| G | 9 | RP Peri-aortic LN II    | UBAC1   | 9  | 138831581 | C | T    | 55  | 15  | p.G301R  | Missense_Mutation | SNP | 0.06 |
| B | 9 | Hilar LN                | Unknown | 15 | 78276756  | G | A    | 229 | 20  | NA       | IGR               | SNP | 0.06 |
| D | 9 | Inferior Liver II       | Unknown | 15 | 78276756  | G | A    | 252 | 0   | NA       | IGR               | SNP | 0.11 |
| G | 9 | RP Peri-aortic LN II    | Unknown | 15 | 78276756  | G | A    | 207 | 0   | NA       | IGR               | SNP | 0.06 |
| B | 9 | Hilar LN                | Unknown | 7  | 121080997 | T | A    | 362 | 0   | NA       | IGR               | SNP | 0.06 |
| D | 9 | Inferior Liver II       | Unknown | 7  | 121080997 | T | A    | 468 | 31  | NA       | IGR               | SNP | 0.11 |
| G | 9 | RP Peri-aortic LN II    | Unknown | 7  | 121080997 | T | A    | 414 | 0   | NA       | IGR               | SNP | 0.06 |
| B | 9 | Hilar LN                | USP31   | 16 | 23116895  | G | C    | 87  | 19  | p.POR    | Missense_Mutation | SNP | 0.06 |
| D | 9 | Inferior Liver II       | USP31   | 16 | 23116895  | G | C    | 106 | 0   | p.POR    | Missense_Mutation | SNP | 0.11 |
| G | 9 | RP Peri-aortic LN II    | USP31   | 16 | 23116895  | G | C    | 106 | 0   | p.POR    | Missense_Mutation | SNP | 0.06 |
| B | 9 | Hilar LN                | USP31   | 16 | 23116905  | G | C    | 86  | 16  | NA       | Intron            | SNP | 0.06 |
| D | 9 | Inferior Liver II       | USP31   | 16 | 23116905  | G | C    | 92  | 0   | NA       | Intron            | SNP | 0.11 |
| G | 9 | RP Peri-aortic LN II    | USP31   | 16 | 23116905  | G | C    | 99  | 0   | NA       | Intron            | SNP | 0.06 |
| B | 9 | Hilar LN                | USP37   | 2  | 219414559 | G | T    | 140 | 16  | p.S134R  | Missense_Mutation | SNP | 0.06 |
| D | 9 | Inferior Liver II       | USP37   | 2  | 219414559 | G | T    | 160 | 0   | p.S134R  | Missense_Mutation | SNP | 0.11 |
| G | 9 | RP Peri-aortic LN II    | USP37   | 2  | 219414559 | G | T    | 160 | 0   | p.S134R  | Missense_Mutation | SNP | 0.06 |
| B | 9 | Hilar LN                | UTRN    | 6  | 145079066 | G | C    | 102 | 0   | p.T2812T | Splice_Site       | SNP | 0.06 |
| D | 9 | Inferior Liver II       | UTRN    | 6  | 145079066 | G | C    | 137 | 54  | p.T2812T | Splice_Site       | SNP | 0.11 |
| G | 9 | RP Peri-aortic LN II    | UTRN    | 6  | 145079066 | G | C    | 93  | 0   | p.T2812T | Splice_Site       | SNP | 0.06 |
| B | 9 | Hilar LN                | VSTM2B  | 19 | 30020913  | C | T    | 547 | 37  | p.A162V  | Missense_Mutation | SNP | 0.06 |
| D | 9 | Inferior Liver II       | VSTM2B  | 19 | 30020913  | C | T    | 546 | 0   | p.A162V  | Missense_Mutation | SNP | 0.11 |
| G | 9 | RP Peri-aortic LN II    | VSTM2B  | 19 | 30020913  | C | T    | 527 | 2   | p.A162V  | Missense_Mutation | SNP | 0.06 |
| B | 9 | Hilar LN                | VWF     | 12 | 6220088   | C | T    | 379 | 0   | p.G89G   | Silent            | SNP | 0.06 |
| D | 9 | Inferior Liver II       | VWF     | 12 | 6220088   | C | T    | 229 | 132 | p.G89G   | Silent            | SNP | 0.11 |
| G | 9 | RP Peri-aortic LN II    | VWF     | 12 | 6220088   | C | T    | 399 | 0   | p.G89G   | Silent            | SNP | 0.06 |
| B | 9 | Hilar LN                | ZBTB9   | 6  | 33423311  | G | T    | 156 | 6   | p.G145V  | Missense_Mutation | SNP | 0.06 |
| D | 9 | Inferior Liver II       | ZBTB9   | 6  | 33423311  | G | T    | 195 | 0   | p.G145V  | Missense_Mutation | SNP | 0.11 |
| G | 9 | RP Peri-aortic LN II    | ZBTB9   | 6  | 33423311  | G | T    | 131 | 0   | p.G145V  | Missense_Mutation | SNP | 0.06 |
| B | 9 | Hilar LN                | ZNF148  | 3  | 125032371 | C | A    | 259 | 0   | p.V38V   | Silent            | SNP | 0.06 |
| D | 9 | Inferior Liver II       | ZNF148  | 3  | 125032371 | C | A    | 201 | 97  | p.V38V   | Silent            | SNP | 0.11 |
| G | 9 | RP Peri-aortic LN II    | ZNF148  | 3  | 125032371 | C | A    | 259 | 0   | p.V38V   | Silent            | SNP | 0.06 |
| B | 9 | Hilar LN                | ZNF277  | 7  | 111970176 | A | -    | 78  | 0   | p.K236fs | Frame_Shift_Del   | DEL | 0.06 |
| D | 9 | Inferior Liver II       | ZNF277  | 7  | 111970176 | A | -    | 132 | 37  | p.K236fs | Frame_Shift_Del   | DEL | 0.11 |
| G | 9 | RP Peri-aortic LN II    | ZNF277  | 7  | 111970176 | A | -    | 108 | 0   | p.K236fs | Frame_Shift_Del   | DEL | 0.06 |
| B | 9 | Hilar LN                | ZNF568  | 19 | 37488383  | G | A    | 210 | 13  | p.G564E  | Missense_Mutation | SNP | 0.06 |
| D | 9 | Inferior Liver II       | ZNF568  | 19 | 37488383  | G | A    | 213 | 0   | p.G564E  | Missense_Mutation | SNP | 0.11 |
| G | 9 | RP Peri-aortic LN II    | ZNF568  | 19 | 37488383  | G | A    | 174 | 0   | p.G564E  | Missense_Mutation | SNP | 0.06 |
| B | 9 | Hilar LN                | ZNF696  | 8  | 144378807 | A | G    | 152 | 0   | p.H321R  | Missense_Mutation | SNP | 0.06 |
| D | 9 | Inferior Liver II       | ZNF696  | 8  | 144378807 | A | G    | 159 | 42  | p.H321R  | Missense_Mutation | SNP | 0.11 |
| G | 9 | RP Peri-aortic LN II    | ZNF696  | 8  | 144378807 | A | G    | 183 | 0   | p.H321R  | Missense_Mutation | SNP | 0.06 |
| B | 9 | Hilar LN                | ZNF786  | 7  | 148771479 | C | T    | 144 | 19  | p.W99*   | Splice_Site       | SNP | 0.06 |
| D | 9 | Inferior Liver II       | ZNF786  | 7  | 148771479 | C | T    | 146 | 0   | p.W99*   | Splice_Site       | SNP | 0.11 |
| G | 9 | RP Peri-aortic LN II    | ZNF786  | 7  | 148771479 | C | T    | 91  | 0   | p.W99*   | Splice_Site       | SNP | 0.06 |
| B | 9 | Hilar LN                | ZNF862  | 7  | 149557878 | C | T    | 342 | 0   | p.L543L  | Silent            | SNP | 0.06 |
| D | 9 | Inferior Liver II       | ZNF862  | 7  | 149557878 | C | T    | 314 | 0   | p.L543L  | Silent            | SNP | 0.11 |
| G | 9 | RP Peri-aortic LN II    | ZNF862  | 7  | 149557878 | C | T    | 222 | 30  | p.L543L  | Silent            | SNP | 0.06 |
| B | 9 | Hilar LN                | ZSCAN21 | 7  | 99654810  | G | T    | 137 | 31  | p.E61*   | Nonsense_Mutation | SNP | 0.06 |
| D | 9 | Inferior Liver II       | ZSCAN21 | 7  | 99654810  | G | T    | 228 | 0   | p.E61*   | Nonsense_Mutation | SNP | 0.11 |
| G | 9 | RP Peri-aortic LN II    | ZSCAN21 | 7  | 99654810  | G | T    | 207 | 0   | p.E61*   | Nonsense_Mutation | SNP | 0.06 |
| B | 9 | Hilar LN                | ZSCAN21 | 7  | 99654811  | A | T    | 133 | 31  | p.E61V   | Missense_Mutation | SNP | 0.06 |
| D | 9 | Inferior Liver II       | ZSCAN21 | 7  | 99654811  | A | T    | 213 | 0   | p.E61V   | Missense_Mutation | SNP | 0.11 |
| G | 9 | RP Peri-aortic LN II    | ZSCAN21 | 7  | 99654811  | A | T    | 204 | 0   | p.E61V   | Missense_Mutation | SNP | 0.06 |
| B | 9 | Hilar LN                | ZSCAN32 | 16 | 3433334   | G | A    | 261 | 0   | NA       | IGR               | SNP | 0.06 |
| D | 9 | Inferior Liver II       | ZSCAN32 | 16 | 3433334   | G | A    | 303 | 41  | NA       | IGR               | SNP | 0.11 |
| G | 9 | RP Peri-aortic LN II    | ZSCAN32 | 16 | 3433334   | G | A    | 334 | 0   | NA       | IGR               | SNP | 0.06 |
| B | 9 | Hilar LN                | ZSWIM2  | 2  | 187702125 | T | A    | 186 | 17  | p.L217L  | Silent            | SNP | 0.06 |
| D | 9 | Inferior Liver II       | ZSWIM2  | 2  | 187702125 | T | A    | 381 | 0   | p.L217L  | Silent            | SNP | 0.11 |
| G | 9 | RP Peri-aortic LN II    | ZSWIM2  | 2  | 187702125 | T | A    | 219 | 0   | p.L217L  | Silent            | SNP | 0.06 |
| B | 9 | Hilar LN                | ZSWIM6  | 5  | 60839345  | - | AAGT | 227 | 0   | p.-951fs | Frame_Shift_Ins   | INS | 0.06 |
| D | 9 | Inferior Liver II       | ZSWIM6  | 5  | 60839345  | - | AAGT | 94  | 50  | p.-951fs | Frame_Shift_Ins   | INS | 0.11 |
| G | 9 | RP Peri-aortic LN II    | ZSWIM6  | 5  | 60839345  | - | AAGT | 198 | 0   | p.-951fs | Frame_Shift_Ins   | INS | 0.06 |

**Table S4. Antibodies Used.**

| Target                                           | Catalog number (Provider)            |
|--------------------------------------------------|--------------------------------------|
| GAPDH                                            | MAB374 (EMD Millipore)               |
| Pan-cadherin                                     | 4068S (Cell Signaling Technologies)  |
| Trop2 (hRS7)                                     | Immunomedics/Gilead                  |
| Trop2                                            | 90540S (Cell Signaling Technologies) |
| Trop2 (EPR20043)                                 | ab214488 (Abcam)                     |
| Trop2                                            | AF650 (R&D systems)                  |
| Alexa Fluor 594 anti- $\alpha$ -tubulin          | ab195889 (Abcam)                     |
| DyLight 488-AffiniPure Donkey anti-Goat IgG +IgM | 109-485-044 (Jackson ImmunoResearch) |
| Cy5- AffiniPure Goat anti-Rabbit IgG             | 111-175-144 (Jackson ImmunoResearch) |
| DyLight 488-AffiniPure Goat anti-Human IgG       | 109-485-044 (Jackson ImmunoResearch) |
